# Supplementary material
Source: PubMed Central journal article supplement (PMC4277214)
Supplement: supp_tpc.114.129965_tpc129965_SupplementalData.pdf [file supp_tpc.114.129965_tpc129965_SupplementalData.pdf]

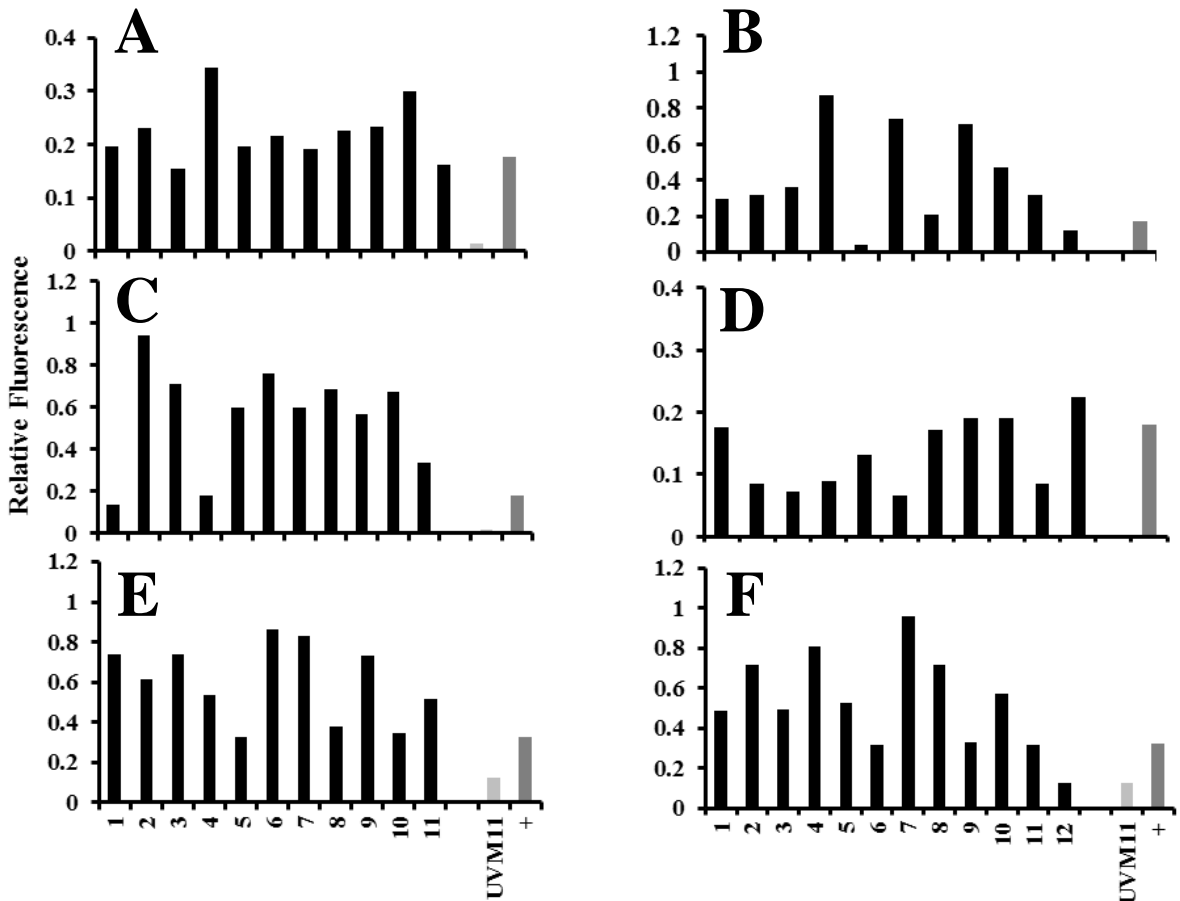

### Supplemental Figure 1. Relative Fluorescence Intensity of *Chlamydomonas* Cells Expressing Fluorescent Fusion Proteins.

Fluorescence of the Venus (**A-D**: ACK1, ACK2, PAT1, and PAT2) and mCherry (**E-F**: ACK2 and PAT1) fusion proteins from *Chlamydomonas* transformants (from 1-12), visualized using a TECAN microtiter-plate reader. The UVM11 strain was used as a negative control while pLM004\_Venus and pLM004\_mCherry were used as positive controls (indicated with '+' on the x-axis). The y-axis represents the relative fluorescence compared to the UVM11 strain, and the x-axis represents individual transformants. Fluorescence from the cells was monitored at 3 different cell densities; the results for the different densities were similar.

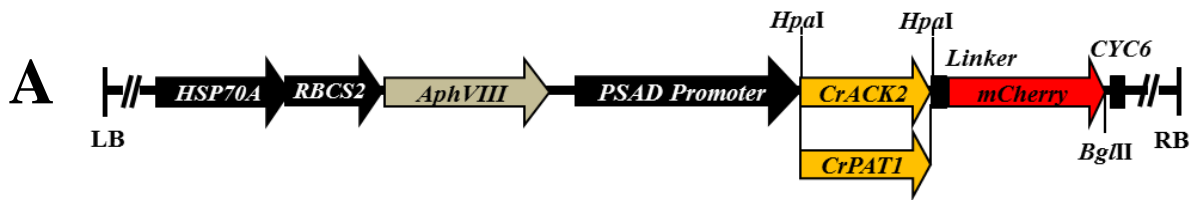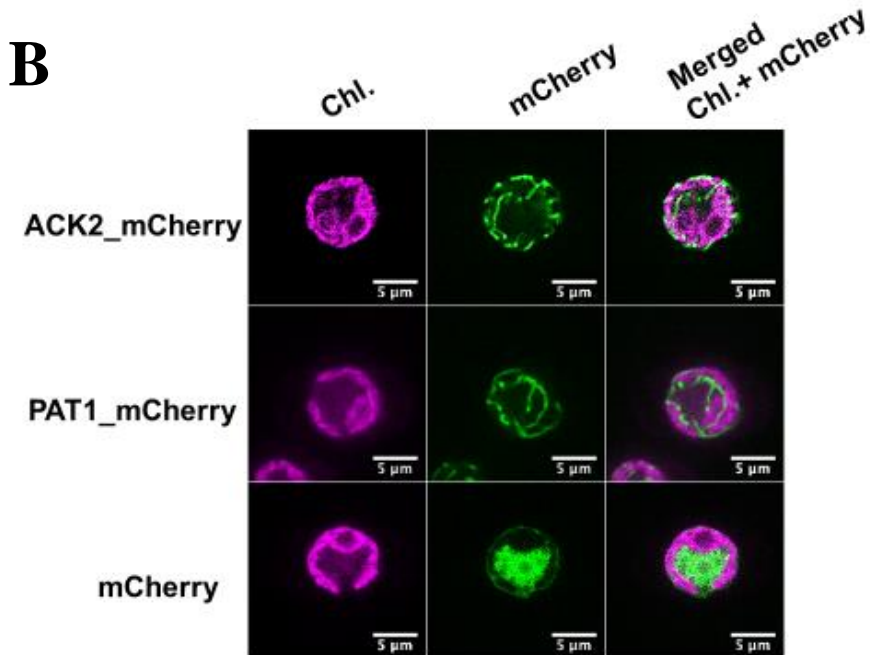

### Supplemental Figure 2. Localization of ACK2 and PAT1 Using mCherry Fusion Proteins.

**(A).** Schematic of the pLM004\_mCherry with the *ACK2* or *PAT1* gene fusions. The black arrows represent the promoters, including the tandem *HSP70* and *RBCS2* promoter driving expression of the *AphVIII* gene, and the *PSAD* promoter driving expression of the genes of interest. The *ACK2* and *PAT1* cDNAs are highlighted in yellow; the *mCherry* gene is in red. The black box in front of the *mCherry* gene represents a small linker region and the black box after the *mCherry* gene represents the *Cyc6* terminator.

**(B).** Localization of *ACK2* and *PAT1* proteins. For all panels, column 1 shows the auto-fluorescence of chlorophyll (Chl.), column 2 the images of the mCherry fluorescence signal (mCherry), and column 3 the merged images of column 1 and column 2. Scale bars are 5  $\mu$ m.

**A**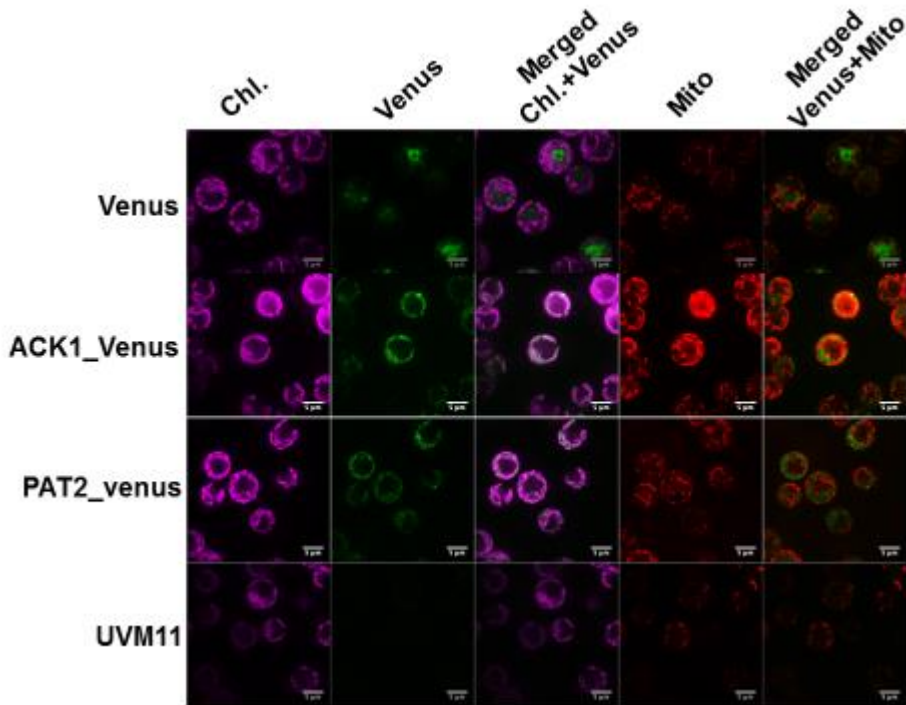**B**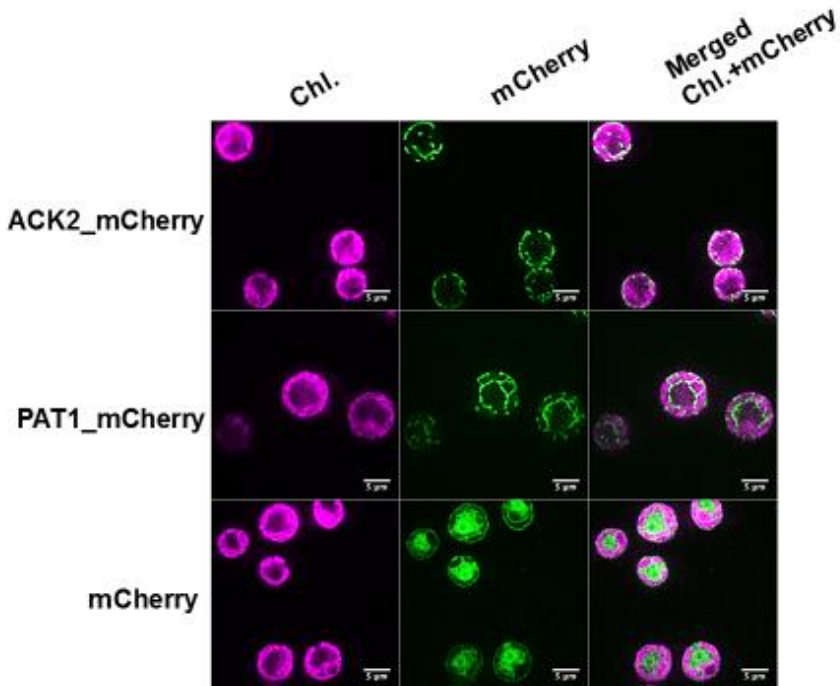**Supplemental Figure 3. Localization of ACK 1/2 and PAT 1/2 in Multiple Cells.****(A).** Localization of ACK1 and PAT2 Venus fusion proteins. Scale bars are 5 μm.**(B).** Localization of ACK2 and PAT1 mCherry fusion proteins. Scale bars are 5 μm. The different columns are the same as in **Figure 3B**.

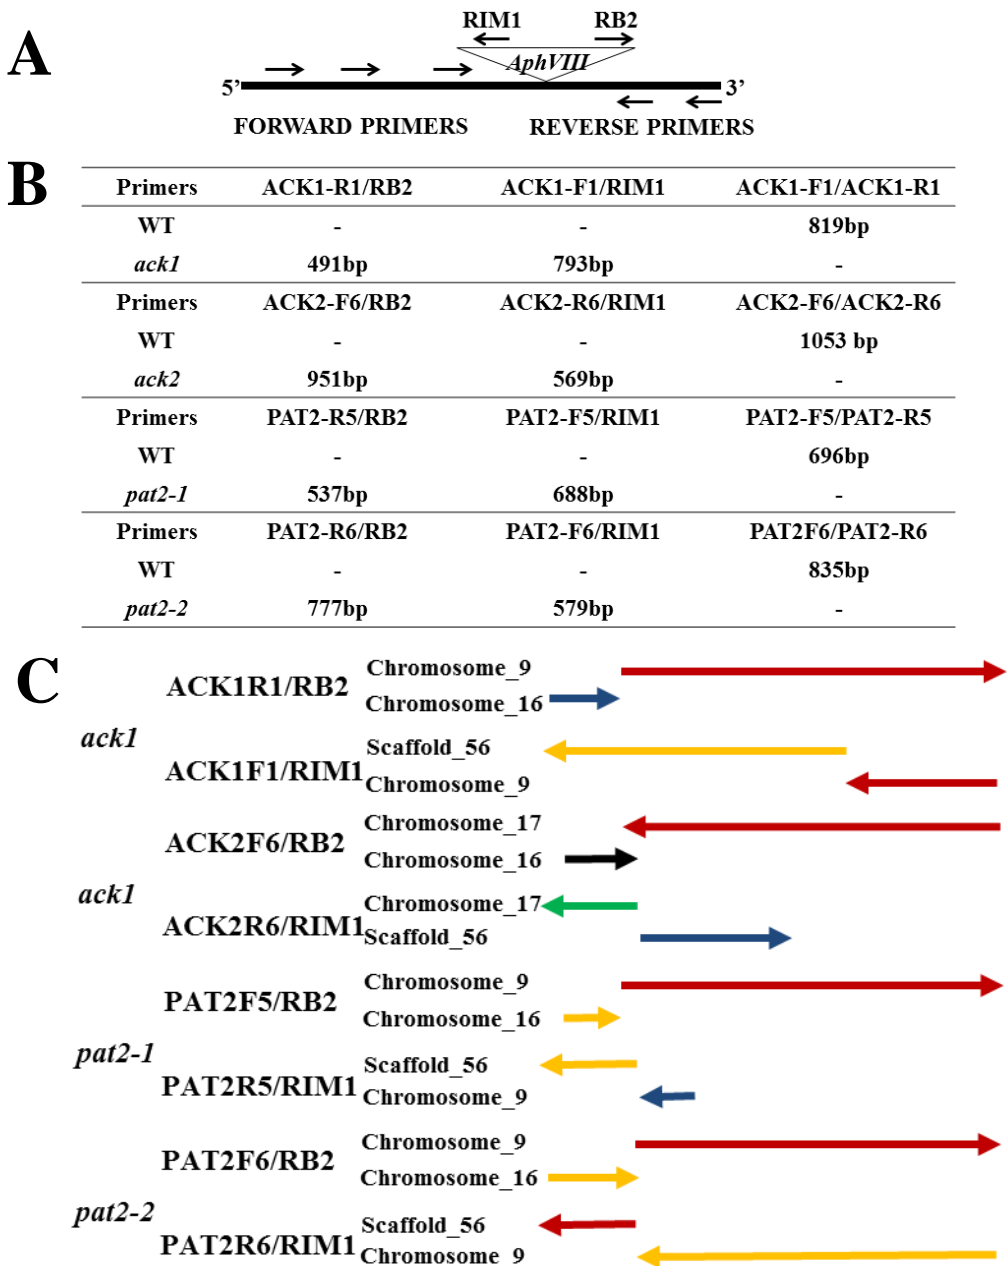

### Supplemental Figure 4. Genetic Analyses of *ack* and *pat* Single and Double Mutants.

(A). Schematic showing the positions of the RB2 and RIM1 primers at the borders of the *AphVIII* insertion with representations of primers within the *PAT/ACK* target gene.

(B). Amplicon sizes from WT and the different *PAT* and *ACK* mutants by PCR.

(C). Junction analyses of the four single mutants by PCR amplification and sequencing. The amplicons described in (B), generated with RB2 and primers for *PAT* or *ACK* sequences represent chimeric products containing the *Cyc6* sequence of the 3' end of the insertion cassette and a region of the *PAT* or *ACK* gene contiguous to the 3' end of the cassette. The amplicons generated with RIM1 and primers for *PAT* or *ACK* represent chimeric products containing the *PSAD* promoter at the 5' end of the insertion cassette and a region of the *PAT* or *ACK* gene contiguous to the 5' end of the cassette. Different colors of arrows represent the lengths of the alignment (the matches are exact). Black: less than 40 nucleotides. Blue: 40-49 nucleotides. Green: 50-79 nucleotides. Orange: 80-199 nucleotides. Red: more than 200 nucleotides.

**Supplemental Figure 5. Genomic and CDS Sequences of *ack1*, *ack2*, *pat2-1* and *pat2-2* Mutants.**

Sequences from the genes are in uppercase while the sequences of the *PSAD* promoter, *AphVIII* gene, and *Cyc6* terminator are in lowercase. Blue nucleotides represent UTR, red nucleotides exons, and black nucleotides introns. The forward and reverse primers for the PCR are highlighted in green, while the RB2 and RIM1 primers are highlighted in pink and yellow, respectively. Newly introduced nucleotides are shown in bold.

***ack1* GENOMIC SEQUENCE**

GATGGCCGACACCATGGTCGTGTGAATTGACATTCCAAGTTGACTTACCGATATCAAAGACGCAAAC  
 ATATACGCGTTATTGGACGAGTCGCACTGTGTGCGAACCCCTGCGAAAATTACGGAGCGACTCGG  
 CCGAACCGAATAGCGAATTTAAGCCTCTTAGTAA**TACCTAGAATGCTGGCTGGC**AAAGTGCCTGTC  
 GGGTCGGCAGTGGCCACCGCGCAACACCGCTCCCTCCGGCAAGGGGTCAAAGGTGCTCGTGGTGAA  
 CGCCGGCAGCTCCAGCATCAAGTTTAAATCTTCCAGCGGACGCTGTTGCCGGCCGGCTGG  
 CCTGTTT**GACCGTATCG**GTGAGGGTTGCGGTGCGGGACATGCGGGGTGCGGGCATGCAACCAATC  
 CGGCACCCGGCGTGTGACGCGTCGTCTTCCGCGACAACAACCATCCCAACCAACTGCCTCTGGATA  
 GATGTGTGGTGGCTGCATGATTGACGGTCATCGACGGCACGGAACCTGTCCGAG**GTGACCCGGC**  
**CAACTGCGTGTGAAGGCTAGCGTGCCCGACGATGGCGGCAAGCCCAAGAAGTTCGAGAAGAAGAT**  
 accaatcgtcacacgagccctcgtcagaaacacgtctccgccacgctctcctctcacggccgaccccgagccctttgcccttccataggccacc  
 gacaggacccaggcgctctcagcatgcctcaacaacccgtactcgtgccagcggtgcccttggctggatcgcttggaaagcgcatgcaagac  
 gaagggcgagcaggcgccctggctggtcgaagggctcggccagttcggtgctcttccacgcgctccacacctaccgatcgtgaa  
 ggcaggcaaatgctcatgtttgcccgaactcggagtcctaaaaagccgtcttctcgt**cgttccgagacatgtagca**gatcgcatgcccctttcc  
 tgacgcgctcggccccatattcggacgcaattgcatatttagcacaattggagcaaatctggcgagggcagtaggcttttaagtgaaggcagagag  
 agcaaatgggacgcggtgattattgtatttacgcgacgcccggcgcttagcggccctccccaggccaggacgattatgatcaatatt  
 gttgctcgggactcgtgagggctcctgcccggctgggaggggatctgggaattggaggtacgaccgagatggcttgcggttgcggttgggaggt  
 ttctcgcggagcaagccagggttaggtgctgcttactcgttgcattctaggaccctactactacaacaagcccatatggacgatgcg  
 ttgctgactgcgggctggtatcccggttgtagtggttggaggatggggcctcggggctggttattcggcttggggtggtggcg  
 gagtggttgcaaggtggcagctctggggccggggtgggcttgggtaggctgagcggtggtggtggcggaggtggggattcccgtacc  
 tctgttggagggtggtgggacgaggggtcctggtggtcaccgaagcggctccggggcgtccggccagtgcgcggtggccgcgggag  
 cagcggtggacgtggcgggtgctcggggctcgtcgtcgcacgcgctggactggagcggtgtccggtcagtcagctcgcggtg  
 acggtgccgagggcccggtgctgctgctgaagggagcgtcactggaggtctggagcagggagcggaaggggtggtcgggggagcggt  
 ctcgccgagctggagcggactcggcctcggacgaggatctggcggttgcacggctacctgtgccggacaacgtgctgctgaccctcgtacc  
 tgcgaggtgaccggctgatcagctggggcggtcggcctgcccggactccgatctcgcgctggtgctgcgagctggcccacgagg  
 aggaccctggttccggccggaggttccggcggcttctcgggagtagcggcgcggtggatggggcggtatcggaggaaaagctggcggtt  
**taccggctggtgacgagttctctg**agatatcgaattctcaggtcgggacatccccgaccagggcgggcggggatgttctggccgatgaaag  
**GTCCCGCCAAGGACCACCTGACGGCGATGCAGGACATCATGAGCTTCATTGACGAGAACGTGTGCA**  
**GCACCTTTGCGAGCGAGGTCTGCGCGGTGGGCCACCGCATCGTGACGGCCTCGATATGTCGCAG**  
**CCCAAGCTGTACGCGCGACGTATCAGATCCAAAGACGCCCTCCATGTTTGCACCGCTGCAC**  
**AACCGCCCACTGCAAGGCATATATGCTTGCAGAAGGTGTTTGGGCCAGACGTGCCCGAG****GTG**  
 CGGGTCGCGCGCTGGCGTGGCGTACGGTGTCTAAGAGGGTGGGTGGGGCGATGCGAATGGAGGGC  
 TGGTGGATGGCCGGGGGACCGACCCACATCACCAGAACC CGCCCCAG**ACTCCTCGCTGTGACAT**  
**GC**CTACTTCACCCGCCAGAACC CGCACACCAGGACACTTGTGCACTCTGCCAAGCCCTTTCCCCCT  
 CTCTCTACAAGCCGGACCACCACTGCAACACCGCACAACACACCTGACGCACGCGTCTCCAAC  
 GCCAACCTCAG**GTGGCTGTGTTT**GACACGGC**TTCCACCAAACCATGCCGCCGAGTCGTACGTG**  
**TACGGCTTGCCGTACGACATGTACGAGAAGCACAAAGATCCGGCGGTACGGCTTCCACGGCACTAGC**  
**CACAAGTACCTGGTGGATCAGGCGCGG**GTGAGCGGCTGGGCGGGTGTGGGACGAGGGGACTGG  
 GAGGGGACTTGGGTAGTCACCTTTAGCTCACGGGGAGTAGGACGGGGTGCATGAGGAGAATTCC  
 ATTGCTGAAATCCCAACGCACCCGCTCACGCCAAATCTACAG**CTATGCTGGCAAGAAGTTTCGG**  
**AGACCAACGTCATCACCTGCCACTTGG**GTGAGTGCAGCGGTGCCGGCAGCAGCGTCGCCCGTTGC  
 TTGGCGATGAGGTGTGTTTGTGTGTGTGTGTGTGTGTGTGTGTGTGTGTGTGTGTGTGTGTGTGTGTGTGTGTGTGTGTGTGTGTGT  
 GTGTGTGTGTGTGTGTGTGTGTGTGTGTGTGTGTGTGTGTGTGTGTGTGTGTGTGTGTGTGTGTGTGTGTGTGTGTGTGTGTGTGTGTGT  
 TGTGTGTGTGTGTCTGATCTTCCAGCGACATCCTCGCACGGGGTACTGTGGTCCGCCCTCCCGCC  
 CTTCTCCTTCTCCTGCTTACC CGCCATGCCACCGGTCCCGCAG**GCAACGGCAGCAGCGTGGCC**  
**GCTGTGCGCGGGGGCAGTGTGTGGACACAAGCATGGGCATGACGCCGCTGGAGGG**GTGAGCGA  
 GCTGCGGGTGCATGAGGAGAGCACGGGGGGGAGAGGGGAGAATCCGGTTGGGGTTTCGAGGTGCG  
 AGGGCGGTCTTAGCGGTGGCATTCTGTGGCAGTGGTCCGACTAGACCACCTTGCCGGCACCCATAT

CGTAAACCCCATCCCTTTCCCCACGACGCCTCGGCCCCCTCCCATAAGTATTATCGCTTGCAAGTAA  
 CGCCTCTGCCTGTGCTCCGCTAGTTTCCAGCTTGGTTAGTTTGGGCTGGTATCTACAACCCCTCCCGC  
 CGCTCCCTCGCCGCCAGGCTGCTGATGGGCACGCGCTGCGGCGACATCGACCCGGCGGTGGTG  
 CTGCACATCCAGAACCAGCTGGGGCTGTGAGCCAGCCTGAGTTTGGGGGGGGCGGACCTACAGGG  
 CAGGGCAGGGCAGGGCAGTGGGAGGTGGGGTAGAGCAATCTCATCCCAGATAAACCAACACCCAG  
 CAGCAGCCCAGGGGGCGAGAATTGAAGGGACAGGCCGGGCCGAGGCTAAGGGGTTGAAAGTCCG  
 AAGAGTGCTGCTAGTACCGGAAACGCGCACGGCACGCCTGACCCATCCTTCTTATGATGGTCTAC  
 ACGTCCCATCCCCGCACTCACGCCATGGACACCCATGTTCCGCCACACCCTCACAGGAAACGGAC  
 ACGCTGCTCAATAAGAAGTCAGGTGGGTGGTGTCCCTGCCAGCCCAATCGCCGCCTGTACCATGCC  
 AGACCATGTGGGGCGCTGAACTGGCCGCTCTCCGCGCTCCCCCACGTCTGCCTTCCAATTTTCGT  
 CTCCAATCATGGAGCTCCTTTGCCCTCTCTGCATCTTCCAACCCCTGCGCCTCCCGCTTTCTAT  
 CCGCGCAGGCTGCTGGGGCTGACCGGCTCCAACGACCTGCGCACGGTGATTGAGGGCGCGGGC  
 AAGGGCGAGCCGCGCTCTCAGCTGGGCTGGACATGTTCTGCGGCGCGTGGCAAGTACATCGG  
 AGCTACATGGCCATGCTGGACGGCCAGGTGGGGAGGCGGAGGGGGGAGGGAGGAGGTGTGGTG  
 GATTGGGGGAAGGTGGGACGTGGATTGGGGCATAGTATCCAGCCCGGGGGGGGGGGGGCTGG  
 AGATGGGATGAGGTGCAAGATGCGCGCGCACACGCACACACACATACACATACGCGCGCACCTA  
 CCGCCCCCTCCCCGGCCACTGCGCCGCCAGGTGGACGCGGTGGTGTCTCCGCGGGGCATCGCGC  
 AGAACAGCGCGCTGGTGGGGGACTCATCTGCGACCCGATGCAGGTGAGGGAGGCAAAGCAGTGG  
 GCAGGGCTCGGCCGGGGCAGCGACACGTGGGCGCAGGCGTGATTGTGGGGGTCTTGGCGCAGGT  
 ACGGTAGTACAGATCTACGGCAGCTGCAACGTGTCTACCGGCTCGCGGCAATCTGTTCTGTGTAAC  
 AGACACCCGACTGACTGTCCCTCGCCCCCTTTCTCATGTGGCACTGCAGGCGCTGGGCATCGCAG  
 TGGACAAGGACGCGAACGCGAGCGGCCGTGGGCGGGAAGCAGGTGGGGTGCTGGCCACGTGTGGG  
 GAATGACGGCGTGCCTCGTGTCTGGTTGCGGTGGCGGCGCGAAAGTGATACGGGATAGCTGGAGG  
 GAGAGGTGGTGGAGTGGCTTCGGCGGCTCGGCCGTCTGTTTTGACCATTGCAAAGGATTGCACGG  
 TCCACTTACAAGCGCACACATGCCGCGCACGTATCGCATGATCCATCCGCGCGCACACGTGCCTGT  
 GCTACAGGCCGACATCTCGGGCCCGGGCGCGCGCATCCGCGCACTGGTTCATCCCACCGATGAGG  
 AGCTTTCCATCGCGCAGCAGACATTGCAGGTGGGTGATGAGGGGCGGGTTGGGAGTCCGGCGGTG  
 GTGGTGGTGGTGGGGGAATGGGGTTTGGGCCCGGGGTGAGGCGCAGGCGGGCAGCTCACTGAC  
 CCTGCTTGATACTGCTTGGTCCCTGCTGAGGTCTAGTTCCTTGGCTTTGCGCCTCAGGTGGTGCGC  
 GCGCGGCGCTGGCCGCTTAGCCGCTGGCACCCGCGTGAACCAGTGACGTACCGCATGTCAGCTTG  
 CACAGAGGCTGCTATTCATCTGCGCAATGCGTCAAGCGTGGCATGGAGCGTGGAGCCTTATGGCTC  
 GATGGAGAAGGGACCTACACTCTGGGGCTGTGGCGGAGGGCCGAGGGCGAAGGCAGGTGATCGG  
 CATTAGCGTGTGAGCTCGGTGGCGTGAGAGACTTGTAGGGTGGAAAGGAGCGTGCGGCATATGGGG  
 TGCCCGGATTCCGGCGGTGCAGCAGCGGCAGGACGCTTCAGGTGACTTGGAGGCAGGGGGCGTGC  
 GTGCGCCAGCGAGGAATCGTGTCTGAGCGGATTGAGTTTATTGGGGTTACATCATGAACGCGTG  
 CAAGAGAACTGGATGGAGCATGGATGTCGCGGGGGATGGTGCCTTGCATGTCGCGGGAGATGGT  
 GCGTTTGCATGTGCGTGGCTTTGCTTGCGTAGTCACGTGAGAACCCTGGTGCATTGCCGGCCCTA  
 TGAGGGGACCTTGGCACGGCGAATCGGATTATGAGCTGGTGGTGTAGCTTGTCTGTTCAAGTCGGG  
 GTACCGCAACGGAACCGCAACGGGACCGCTGACGCGGGGACTGCCTTTGGGGTGGGGTGGG  
 CTTAAGCCTGGAATGGCAGCATGGCGGATCGGTCCCAACCAGCCACCCTGGCAATGGAAGTGAAGA  
 CAAAATATATATTGCAGACTTGATATTAAGCTGCTGTATTGAACAACGTTATAGACGACGTATCTTGA  
 AGCATGCGTTTTGACTTCGCCACCTTCCCGGGCGTCTGCGTCGTCAGACAAGGCCCTGAG  
 CCTTACCAGTGTGTAGCTCGGATAATT

### **ack1 CDS SEQUENCE**

ATGCTGGCTGGCAAAGTGCCTGTGGGTGGCAGTGCCACCGCGCAACACCGCTCCCTCCGGCAA  
 GGGGTCAAAGGTGCTCGTGGTGAACGCCGGCAGCTCCAGCATCAAGTTTAAATCTTACAGCGGA  
 GACGCTGTTGCCCGGCGCCGCTGGCCTGTTGACCGTATCGGTGACCCGGCCAACCTGCGTGTGAA  
 GGCTAGCGTGCCCGACGATGGCGGCAAGCCCAAGAAGTTCGAGAAGAAGATaccaatcgctcacagagccct  
 cgtcagaaacacgtctccgccaacgctctccctcacgpgccgaccccgagccctttgccccttctaggccaccgacaggaccagggcgtctca  
 gcatgcctcaacaacccgactcgtgccagcgggtgccctgtgctggtgatcgcttgaagcgcgatgcaagacgaagggggcggagcagggcggc  
 ctggctgttcaagggctcgcgcccagttcgggtgcctttccacgcgcgctccacacctaccgatcggtgaaggcaggcaaatgctcatgttgc  
 ccgaactcggagtcctaaaaagccgctcttctgctcgttccgagacatgtagcagatcgagtgccaccttctgacgcgctcggccccatattc  
 ggacgcaattgtcattgtagcacaattggagcaaatctggcgaggcagtaggctttaaagttgcaaggcgagagagcaaatgggacgcgggcgt  
 gattattggtattacgcgacggccggcgcttagcggccctccccaggccaggacgattatgtatcaatattgttgcgttcgggcactcgtgcg

agggctcctgctgggctggggagggggatctgggaattggaggtacgaccgagatggcttctcggggggaggttctcgcgagcaagccagg  
 gttagggttgctgctcttgactcgtgtgcattctaggacccactgctactcaacaagcccatatggacgatgcgttgcgtgactcggggctcgt  
 atccccgttgtagtgggttggaggatggggcctcggggctggtgtttatcgctcgggggtggtggcgggaggtgttgcaggtggcagc  
 tctggggccgggggtgggttgggtgaggctgagcggctggtgtggtggcggaggtggggattcccgtacctggttggagggtggtgggg  
 acgagagggctcctggttgctcaccgaagcgggtccggggcgtccggccagtgccggtggccgaggagcagcggctggacgtggcgggtg  
 cgctcggggctcgtcgtcgtcgcacgcgctggactgggagcgggtgctccgttcgatcgcagctcgcggtgacggtgccgaggcggccgtg  
 ctgtcgtgaaggagcgtcacttgaggatctggacgaggagcgggaaggggtggtcggggagcggcttctcggcga gctggagcggactc  
 ggctcgggacgaggatctggcgggttgcacggctcacctgtgccggacaacgtgctgctcgcacctctgacctgaggtgaccgggctgatc  
 acgtggggcgggtcggcgtcggaccggcactccgatctcgcgctggtgctgctgagctggcccacgaggagaccggctggtcggggcgg  
 agtgttccgcggcgttctcggggagtacgggcgcggtgggatggggcggatcggaggaaaagctggcgtttaccgggctgtggacgagttctt  
 ctgagatctgaattctcaggtcgggacatccccgaccaggggcgggggtggtgctggccgatgaaag**G**TCCCGCCAAGGAC  
 CACCTGACGGCGATGCAGGACATCATGAGCTTCATTGACGAGAACGTGTGAGCACCTTTGCGAGC  
 GAGGTCTGCGCGGTGGGCCACCGCATCGTCACGGCCTCGATATGTCGACGCCAAAGCTGCTCAC  
 GCCGACGTCATCAGATGCATCCAAGACGCCCTCCATGTTTGACCGCTGCACAACCCGCCACCT  
 GCAAGGCATATATGCTTCGAGAAAGGTGTTTGGGCCAGACGTGCCGAGGTGGCTGTGTTTGACAC  
 GGCCTTCCACCAACCATGCGCCCGAGTCGTACGTGTACGGCTTGGCGTACGACATGTACGAGAA  
 GCACAAGATCCGGCGGTACGGCTTCCACGGCACTAGCCACAAGTACCTGGTGGATCAGCGGCGG  
 CTATGCTGGGCAAGAAGTTTTCGGAGACCAACGTCATCACCTGCCACTTGGGCAACGGCAGCAGCG  
 TGCCCGCTGTGCGCGGGCAGTGTGTGGACACAAGCATGGGCATGACGCCGCTGGAGGGGCT  
 GCTGATGGGCACGCGCTGCGGGACATCGACCCGGCGGTGGTGTGCTGCACATCCAGAACCAGCTGG  
 GGCTGTCAGCCAGCGAAACGGACACGCTGCTCAATAAGAAGTCAGGCCTGCTGGGGCTGACCGGC  
 TCCAACGACCTGCGCACGGTGATTGAGGGCGCGGGCAAGGGCGAGCCGCGCTCTCAGCTGGGCT  
 GGACATGTTCTGTCGGCGCGTGCAGCAAGTACATCGGAGCCTACATGGCCATGCTGGACGGCCAGG  
 TGACGCGGTGGTGTCTCCGCGGGCATCGGCGAGAACAGCGCGCTGGTGGGGGACTCATCTGC  
 GACCGCATGCAGGCGCTGGGCATCGCAGTGACAAGGACGCGAACGCAGCGGCCGTGGGCGGGA  
 AGCAGGCCGACATCTCGGGCCCGGGCGCGCATCCGCGCACTGGTCATCCCCACCGATGAGGAG  
 CTTTCCATCGCGCAGCAGACATTGCAGGTGGTGCAGCGCGCGGCGCTGGCCGCTTGA

#### **ack2 GENOMIC SEQUENCE**

CAGCTCCGCTTCTCTCGCTGCAGCTGCTACTTCTTAGGACAGTCCAACCGATCTGCCACTTTCTC  
 CAGGGGTGCACCTCATTCCATACCGTACATGGGCGCACGCATGTGCGCCGGTGTGCATGCACTGG  
 GTGGCACTGTCCATTGTGTCTAACGACTCGCTGAGCAGGCTAATCCTCGCCAATTGCCACCGTATCG  
 TATCCTACCGTAGGGGGTATTGATATAACAAGAGGTATCGCGAGAAACGATGCAACGCGTCTTGTTCC  
 TGAACGCGGGCAGCAGCTCGCTTAAGTTTAAAGTGTTCACAGCGGCCGGTACTTCTCTTGAGAAAG  
 CAGGCCTTGGTGGGCAGTTCGATCGTATTGGCGATGTCGCGAATTGCACCCTCAAGGCAAGCCAGC  
 CTGGCGCCGCGCCGGGCATGAAGCCGCGCAAATGGGAGCTCAAAGTGCCGGCGCAGGATCACGT  
 GGGCGCCATGAAGGTGAGAGAGCGTCGCTCGGCAGACAACCGCTTAAAGTTCAAGGCTCCCCGCG  
 CCCTGCACCCCTGCTGTTCTCCGCACCCCACTCCCTGCTTTTACTGCTCCGGCACCGGCTGAG  
 GCTAACTTCGTAATCCAGGATGCTCTGTAGTATTTGCTTGTATAGCCGCTGCGTGCCACCTGTGCG  
 GGGCTCACTGGGCGCCAGCTACGTTGCGAACTTCTAATGGCGCAGGGAAGGGAGTGGGGGCTGC  
 TGGTGCCGCACCCCTGGGGTCTGGGACATCGCGTGCAGTGCATGTGCGTCTCGCGAACTAGTGAA  
 TGCTGTAGAAGCTTCTGTCGTCGACTCGTAACCAAGGCAGTCGGCCTTGAGTTGCACCCGCGCG  
 CACGTGCCACACACGTTTGTAGCAGGGCATCCTGGATTTTCATCAAGGAGAATGTCTCGGCGACTTTTG  
 CGAGCGAGGTGGTGGCTGTGGGTGAGTGGGCAAGGGCGGTAGATGTTTGGGCCGAGAACAGCTA  
 AACCCCTGTGCGGCGGATGCCAGAGGGTCAGGCAACACCGCTTGGCCGGCGACGCCTTGCCATCA  
 CACTCCACCTGTTGCTGACACAGCGGATGCTGTTGCTGCTGTTGCTGCTTGTTCATATTGAAGTTA  
 TGGCATTGCTGTTGTTGTTGCTACTGCTGCTGTTAGTACTGCTTGATTCACCTTGGTACGGCGCTGCA  
 CGCCGCGCAGGCACCGCATCGTCCATGGTCTGGACCTGAGCCAGCCGGTGGTGGCGACTGGAGCCG  
 TTCGCGGCAGCTTACGCTCGACTGACAGGGCAGGGCTGGGGCCGGTGGTGGCGACTGGAGCCG  
 GCTTGTCCGAGCCACCAGCCAGGGGCTCAACTGTACCTGTTTTTAAATGCGCGGCCCTGTAAGTCC  
 GCCAACCAAGTAGTTATAGTTGTAATGTGCGGATGAGACCCCGACCCTGCACCTGTACCCCTGGG  
 CCAGGTGCTGCTGACGCCCTCCAGCACGGCCACCATCAAGCAGGCGGCTGTGCTGGCGCCGTTGC  
 ACAACCCGCCCCGGGCTGCAGGGCATTGAGGCGGCCACGGAGGTGTTACGCGGCGTGGCCGAGGT  
 GGGGTCACATTCATGATTAGTTGAGGAAATGAAGGTGTAGCCAGCAGGCACAGTGGTACAGCAGGC  
 GCGTCTTACCCATGTCCATGAGGTCCAGCGGCCAGCTCCAGCGCGTAGGCCCTCCGAAGGCTGC

TGCTCTCCCATTTGTCCTGAACTATTCAATGTTGGTTGATCATGATTAAGTACAGCGGTTCGCGTAAA  
 GCTCAGCAGCGCTCGGATGCATATGCGGATGCTCGGGCAACGCTGCCGCCGCTGAACTTTCTGAA  
 CCGGGCTTGCTTGTCTCATCTGCTTGCCGCAAGCTGGGGCGGGTTCGGGGTGGGGCGGAGGTTG  
 GGGCGCGGTTCGGAGGCACGGGTGCGCTTGGTGCATGTCATCTCTGGCAGGCGTGAAGGGAGGG  
 GAAGGGAGACCGTCAAGGGAGGAGCGGGCGGGGCGGATGGGGGAGTTTTTGTGGGATGGGGGTG  
 GTGTGGGGAGCATCCGCTGTGCGTAAGCGGAAGGCCAGGGGCACGCAGGTCGATGTGCAGCGTTG  
 CGCCTCCCCTTCCCCTCCCCTGTACTCCGGGGGAGGCCAAAACAGCTTACCGTCGCTTTGCCCTGGG  
 ACCCTCAGACAGGCTGTAGCACGGCCTTACAGGGCTCTGAAGCAGGACATGCACGCACCCACTTGT  
 TTGGCAACAAACATATGCACACATACGTACGCACATATACGGTGGGGGAATCGAGCCCTTACACCAG  
 GCAGAGTGTCCCGCATGGCCGCTTGCGCATTCAAGCACGCACCTGCGCCGCCCCACGTCCCGCC  
 GCAGGTTGCTGTGTTTGACACGGCCTTCCACCAGACCATGCCGCCGCACGCTACATGTACGGACT  
 GCCATACGAACTGTACGAGAAGCACAAGATCCGGCGGTACGGCTTCCACGGCACCCAGCCACAAGTA  
 CCTGGTGGAGCAGGCGGGGGTGTAGCGGCGTGGCGGAAGGCTGGGGTGGCGGGGCGGGGGCGG  
 GGTGGGGGCAAGGGCGGGGGCATGCATGCGCACATGCATTGCGGCTGCACAGGTGGAATGCACA  
 AAGAGGCGATGCGGTGCGGCTACACTCTCGTGCAAGGCATTGTAACAAGCTGCAATATCACCG  
 CCAGCGCAATGGAAGGAGTTGTGTTCTGTCCTGTGTCGCTTGTGTTTATGCGTCCCTTGACCC  
 CGCCTCTTCTGCGCCGCTTCCCCTCTGCACCCGCACCTGTGACGTCTGCAGCCATGCTGGGCAA  
 GCCCGTGTCTGACACCAACGTCATCACCTGCCATCTCGTGTGCGTTCATCTGGGCTGTTGCAAACAC  
 GAATACACCGTCATTCCGCCTCAATGTTGCTTCGGTCATCGCCTAGCCAGGGCTGTGTAAGTCCGTC  
 TCCAGGAATCCTGCACGCCATACTCACGCGACCGCAACCCGTACAAGCAGCTCCTCATAACGCGCC  
 GCTCCTGCTGCTGTTACCCGCTGGGCTGCTGCTGTTGCTTGTGGGCTGCAGGCAACGGCAGCAGT  
 GTGGCGGCGGTGCGCGGGCGGCAATGCGTGGACACGAGCATGGCCCTCACGCCCTGGAAGGT  
 GAGCGAGAGAGCGCGGCAGTGGGGCCTGTTCTTACCATTCAAGATATCACCCTAAAAACACCAGC  
 GACGCAAAGGGACAGGCCGGGGACTGAAAGTTGCAGGGGTGCTCGAGTCGGCCGGCCCATGTGTG  
 CTACACGATCCCCGGACGAATTTGACGTCAATCCGGTGTGATGGGCACGTAGCAACCCTCTTCCC  
 GAAACCTCAATACTCTGCCCGGTATCAGTTGCTCACCACCTGCTGCCCTCAGACTGCTGATGGGC  
 ACGCGCTGCGGCGACATGGACCCCGCGGTGGTGTGTCACATCCAGAACCAGTGCGGCCTGAACGT  
 CAAGGTGTGTGCATGTGTGTGTTAGCACAAAGGGGATAGGATGTGGGGCTGGCAGGAACCGGTGCA  
 AGTCAAGTCCCTTGACCGCCCGTGCCTGCGGGTTTTGTGCCGTACAGGAGACCGACACGCTGC  
 TGAACAAGAAATCAGGTGGGTGGGCTGGCGGCTGTCGTACCGTGCAGCAGGGGGCAGCAGCATGG  
 CTGGGCAGCCGGTGCACCTCGTTGGGTTTCGGCTGCAGTACCATGCCTCGCCGTGCCATTCTCA  
 CCGCTTCCCTCCCCATCGGTGTGATGTGTCACGCTGTGACCACCGCGTTGCCAGTACCCTGCTC  
 ACCCTGGCAGCCGCTTGGGAATAAGCTTGTACGGCGTCAGAAGCCTCGCACGATGTCATTAGAAA  
 GCGCCACAGCTTACAAACCTGGACCTCCATTGAACAGTCCCTGAGGTGAAGGTGAATAGGTGAAAC  
 CACTCAAATGAGTGTGCATCACCTATTTGTCCACTGTTGAAGTGAGATCGAACCTGCCATGCGGAC  
 TCGTTTCGCAACGACATGGGGCTAGCTTTTCCACAGTTGTGATGGGTTCCCTCACTCCCTACCCG  
 CCCAGGCTGTGGGCTGACCGGCTCCAACGACCTGCGCGCCGTGATCGAGGGCGCGGGCAAG  
 GGCAGCTGCGGTGCGAGCTGGGCTGGACATGTTACATACCAGCGTGCAGAGTACATCGGAGC  
 CTACACCGCAGCCCTGGACGGCAAGGTGCGCGCATTAGCGTTCATTATTGAGCTCGCTGTGCGT  
 TATGAGACTGACGATTGGACTGCCGCTACTGCTGCTTCCCGGGGCTCGTGTGATGTAAGGAGAAGCG  
 AGCCGAAGGAAGCACGGTAGTCCCGCTGTGCTTGTGTGGCTGCTCGATCGCCTCCGCCCCG  
 CTCCCTTGTCTAGCACGCTCTTAATCTACACGGCCTGCGGCGATGAATGTTGCTAGTACACGCTGC  
 CCACACACCATACCCACAGGTCGACGCGGTGGTGTCTCTGCGGGCATTGGTGAGAACTACCCT  
 TCATCCGCAAGCTGATTGCAGAGCCACTCCACGTAAGTGTGCAGCTTATAAGGGCCATCGTGGTGC  
 TACTCAGCAAACATTGCGTGGGTGTATGGCCTTGTCTTCCAAACTGGCGGCGCTGCACAGCGTA  
 GAGCGCGGGAGCCGCAACACCCGTTTGCCATTACGTACATAAACACCCGCCGACCACAGCACT  
 CACGGCAGTCACTGCCGCAGCCGTCTTCACTAGCCGCACTCTTACTGCCTCCCTGCATCTCTGA  
 GGCACGCTGTGCACCGTAAACACCAACCCTAGCCTCGGGCTCACAACTGCACGGCTTACATTCC  
 CGTTTCCCATACTGTCGACCCGTCCAGGCCAgaaggtagccggctggttaggggaggggaccagcccataca  
 gggctgactcctaagctatagaagtctctgagcaggtgtcgccatattgctgctgaaaaggaggctatggcgggtagggtgggaggggcat  
 gaggcgctcttgccggcctgtgaggccggctgtgcccaggaggagcaccggctgagcgcgctggtgctgctctagcctcaggcca  
 ggcgtgcccggctgggaggggtgagctagctggccagtgagcgtccatgctccagctgctgctgcaacaggcccgtgctcactggcaccggtt  
 ggcgttaggagcaggcgtccggctcaggcaggtgagccgctcttccggcaggggctggtggggaaggcagggagcaggtctaggagg  
 ttagctgagagggaagctgctgctgcccggcggacccgctggcagtgccgctctgacgctagctgctggtggcagggtaggtcagctgcccac  
 gtcgcttctgctcggggcctcgcggtgaggtgagctgagcagggcggcggctgagcggcctgagggccttggcgaagc  
 cactggtgtgctcgggagagcaggggtggtgggaaggtgtgtgctccatgcccctaggggtagggcgggtggtgctgcccagctcggaggt



gggtgtcgggtggggccgggggtctcgacggtggaactgtttgttgagggcggtgggtgggctcggctatttgggtcgggggctccgggtagg  
 aggtgttgggtgagtggtggccctatggctgggctgacgtgcgttgctgtagcaggatatacccgaacaacactcatcgtcaccaggatcttac  
 gtgtgctcagttctcgcgttggttgaccgaacgagccgctccttgagggggctcgtcgttagagccagcatggaggtaagggtctag  
 ggggaggggtcggcgtctcgggagcgtctcagggctgctgtgtataactatgtattagcagggaccggaccctcccggcgattgcgcg  
 gccggcagcgcattatggttattagtcggcgcaggggtgaaacgagagagcgaacgtgaaatctcggtgacggagcgggtctaaacgaggtt  
 aacacgatgttactgttaacgcaggttataccccggctcgcgcagctcctccaccgtgacgctagacgattgtacagagccttgcgtgtcttcgc  
 cgaaaaattcctgaggctcaagcccgttactcgtaaacggacggaagtgcgtagccatccacacctccgcgccacctcttcctgggctga  
 ccgctcggggaagctgtcggctcggcgagcaggcggggaagcagaagcgtacgcaaggttcgctagtggtcgtgtcccgtggcgaccg  
 tgctcatgccaacaactccgtacgactctcgggaccaggacagccaccggatccttcccgtttcccgcagccccagccggcactctccctc  
 gcaccgcctcgcacaaagactgctcccagcagcactgtaacca**TAAATGGGCATGCAGCTGGACCACGCCGCCAACG**  
**ACACGGCCGTGGGGCGCGCCGGCGTCATCTCCACCCCGGCAGCCCGCTGCAGCTGCTGGTCATT**  
**CCCACGGACGAGGAGCTCAGCATTGCGGAGCAGCCCTGCAGCTG**TGTGTGTATATATGTGCGTGT  
 ATGTGCGTGTGTGTGTGTGTGTGTGTGTGTGTGTGTGTGTGTGTGTGTGTGTGTGTGTGTGTGTGTGTGTGTGTGTGTGTGT  
 GCAGAGCGGGTGGCTGGCGGGCGGGGGCCGACCCGACAGGCAGCGCTTTGCCTCACGGCGAG  
 CATGCGGTGTGCGGCCCGCTGGGTGGGTGGGCCCAAGAGGATGACGAGCACAAAGGGGAAAGCG  
 ACCGGCGGTGTGTGTGTGTGTGTGTGTGTGTGTGTGTGTGTGTGTGTGTGTGTGTGTGTGTGTGTGTGTGTGTGTGTGTGT  
 GATTGCGAGAGGAGCTGGCCAATGGTTGTGCTACTGTGTCCCATGCACGCGTTCCAGGTTAATCAA  
 GCGCGTAGATAGCTTTCATGCGCAGGTGTCTCGAGCTACCCCTGAGCCGACGCGCCACTGCTGATT  
 GTGTGTTTTGCAG**GTCGCGAAGGGCGCCTTGGGAGCCGACGCGCATAATCCGCCGCGCAGCGAA**  
**TCCGCCGCTCGAACACGACAAGCTGCAGGGCAATACCCGGCGTCTCTGTGCGCAAGCTTATTAGAC**  
**ATAAGGTCAGGGCATGGCTGTGGTGTGCCTGTGTTGTTTCGACTGTCCCTTCTTTCAATGTTGGTTTT**  
**AGTAAACGCTGGGTGTGCGCCCTGAGCGACTGTGTGCTATCAACAACCTAGGTTGCGTCGGACGGT**  
**GGACCGTGGGGCGCCATTGCATGTGGTAGGAACGTACATGGGAGGGAAACGTATGATACCAGCA**  
**GATAACGCCACGATGCGCAGGCAAGTAGTGAGTTCGAGTGCCTTTGCCAGCACGACATGGCGCATC**  
**GTGTGCGTGAGTCAATGTGACAGGGCAAGGAAGCAAGTGGCTCAGTCCAAGAAACACATTGCTT**  
**CCGGCCGTGCGGGTCCGGGGTCCCCGAGGTTTCTTACGCGGAATGTGGGTGGGACTGCCAGAT**  
**TTCACCTCCGTGCCAGAAGTCCATCCAAACGCTCCGCTCCACAGCGTAAGCACTAGCATAACATTA**  
**GCATGTGCATACTAGAGCATTTGCAGAACGTTTGGCTTTGAATAACTGCGGCTGCAAGTCCGTCCAC**  
**ATCGGCATCCAAGTAGCGTAGAGCTGTGTCTCTGCTGTCTCTCACTGATGGCATGGAGACTGTGCG**  
**AGCTGAAGCTAACCCGTAGTGGTCAAGGCTTAGTGTGGTCTGACAACGCCGGCCCTTACGCTG**  
**GCCACCGCGTCAACCAGGATCCCGGGATGCACTGATCCCGCGAGAACTCGATCAATCTCTTTCGG**  
**CACACAATCCCGAACATCATATGGATGAGCGCAACTGCAAGCGTAAGCGCACGTGCAAACAGTCCC**  
**ACAGTAGGGTCCGTGGTTGGCCGTGGGCAGGATGGACCTATGTGGCCTGGCTAG**

### ***ack2* CDS SEQUENCE**

**ATGCAACGCGTCTTGTCCTGAACCGGGCAGCAGCTCGCTTAAGTTTAAGCTGTTACAGCGGCC**  
**GGTACTTCTCTTGAGAAGCAGGCCTTGGTGGGCAGTTCGATCGTATTGGCGATGTCGGAATTGC**  
**ACCCTCAAGGCAAGCCAGCCTGGCGCCCGCGCCGGGCATGAAGCCGCGCAAATGGGAGCTCAAAGT**  
**GCCGGCGCAGGATCACGTGGCGCCATGAAGGGCATCCTGGATTTTCATCAAGGAGAATGTCTCGG**  
**CGACTTTTTCGAGCGAGGTGGTGGCTGTGGGGCACCGCATCGTCCATGGTCTGGACCTGAGCCAG**  
**CCGGTGTGCTGACGCCCTCCAGCACGGCCACCATCAAGCAGGCGGCTGTGCTGGCGCCGTTGCA**  
**CAACCCGCCGGGCTGCAGGGCATTGAGGCGGCCACGGAGGTGTTGAGCGGCGTGGCCGAGTT**  
**GCTGTGTTTACACGGCCTTCCACCAGACCATGCCGCCGACGCCTACATGTACGGACTGCCATAC**  
**GAAGTGTACGAGAAGCACAAGATCCGGCGGTACGGCTTCCACGGCACCAAGTACCTGGT**  
**GAGCAGGCGGCGGCCATGCTGGGCAAGCCCGTGTCTGACACCAACGTATCACCTGCCATCTCGG**  
**CAACGGCAGCAGTGTGGCGGCGGTGCGCGGCGGGCAATGCGTGGACACGAGCATGGGCCTCACG**  
**CCCCTGGAAGGACTGCTGATGGGCACGCGCTGCGGGACATGGACCCCGCGGTGGTGTGCACAT**  
**CCAGAACCAGTGCGGCCTGAACGTCAAGGAGACCGACACGCTGCTGAACAAGAAATCAGGCCTGCT**  
**GGCCTGACCGGCTCCAACGACCTGCGCGCCGTGATCGAGGGCGCGGGCAAGGGCGAGCTGCGG**  
**TCGCAGCTGGGCTGGACATGTTACATACCGCGTGCGCAAGTACATCGGAGCCTACACCGCAGCC**  
**CTGGACGGCAAGTTCGACGCGGTGGTGTCTCTGCGGGCATTGGTGAGAACTCACCTTTCATCCCG**  
**AAGCTGATTGCAGAGCCACTCCACGCCA**gaaaggtagccgggtcgtttaggggagggggaccagcccctacagggctg  
 gactcttaagctatagagctctttagcaggtgtcggccatttgcggctgaaaaggaggctatggcgggtaggggtgggaggggcatgagggg  
 gtcttgcggcgcttgcagggcgggctgggtgccaggaggagcaccggctgagcgcgtggtcgcgcttagcctcagggcaggcggtg  
 ccggctgggaggggtgacgtagtcgggccagtgagcgtccatgctcccagctcgtcgtgcaacagggccggtgcccactggcaccggttggcggt

ctaggagcagggcgtccggctcagggcaggtcgagccgctcttcggcgagggggctggtggggaagggcagggagcaggtctaggaggtcagct  
 gcgagggagagtcgctgctgcccggcgagccgctggcagtgggcgtctgacgctagcttgcctgtggcgagggcaggtcgcgacgctcgtt  
 gctcgtcggggcgtcgcggtggcgggtgaggtcggcgagggcgccggtggcgctgaccggcctgcccccttggcgaagccactgg  
 ttggtccgtgggagagcaggggtggtgggaggtgtgtgctccatgcccttaggggtggagggcgggtggtggtcggcgagtcggagtggtgtt  
 cgggtggggccgggggtctcgacgggtgaaactgtttgtgagggcgggtggtgggctcggctattgtggtcgggggtcggggtaggaggtgtt  
 gttgggtgagtggtggccctatggctggggcgtcacgtgctgtgtagcaggtatacccgaacaacactcatcgtcaccaggaatcttacgtgttc  
 tcagttctcgttgtgattgggaccgaacgagccgctccttggaggggggctcgttcgtagagccagcatggaggttaaggggtcagggggag  
 gggcggggcgtcctcgggagcgtgctcacgggcttgcgtgttataactatgtattagcagggaccggacccccctccggcgattgcgcgccccg  
 cagcgcattatggttattagtcggtcgcaggggtgaaacgagagagcgggaacgtgaatttcggatgacggagcgggtctaaacgaggttaacacg  
 atgtttactgttaacgcaggctataccccggctcgcgacgtcctttccaccgtgacgctagacgattgtacagagccttgcgtgttcttcgcca  
 attcctgaggtcaagcccgttctgactcgtaaacggacggaagtgcgtagccatccacacctcgcgacaccttctcgtgggtgaccgccc  
 tcgggaagctgtcgtccggcggacgagggcgggaagcagaagcgtacggaaggttcgtagtggctggttcccgtggcgaccgtgctcatg  
 cccaacaactccgtacgactctcgggaccaggacagccaccggatccttcccgtttcccagcggccagcggcactctcctctcgcaccg  
 cctctgcacaaagactgtcccggagcacactgtaacca**TAAATGGGCATGCAGCTGGACCACGCCGCCAACGACAC**  
**GGCCGTGGGGCGCGCCGGCGTCACTCCACCCCGGCAGCCCGTGCAGCTGCTGGTCATTCCCA**  
**CGGACGAGGACTCAGCATTGCGGAGCAGACCCTGCAGGTCGCGAAGGGCGCCTTGGGAGCCGC**  
**AGCGGCATAA**

### ***pat2-1* GENOMIC SEQUENCE**

**CAGACTACCAAGCGATCTACACATATAACAACGGCCGTCAGTACTAGACTAGGACACCGTGCCTCAA**  
**TTACCGCAGCAACAGTCTGCCGCGTTTGTGTTGACCGATTGGTGCATCTGACTGCATCTTCAGCAGT**  
**TATACATAATAAAGTGGAGGATCAACGTGAAACACCAGCCACACGATAATCGAATACTTTTCGGCTCG**  
**AAGCGGCCACAGAGCAACTTCCAGCTCCGACAAAAGCTATCGGAGTATGTCTCTGAACAGTAGCACT**  
**ATGTGCGCCCGGAGGCGGTGGCCGGGGCCCCGGCAGTGGCGCCGTTCCGACACGCCGGGTGG**  
**GTGCTGGATCGCCTGGGAAGTGGGTGGGCGCAAGTGTGAATGTGCAAGACGATGCTGTGATGAAAC**  
**AAACGATTCTAGGCTGCACGTGAGCCAGCGCTTGTGGTTCGGTCTGGCCACCTGCTTGGGGGTT**  
**CTAACTCGAAACGCCGACTGAAAGCAAGCTCTATCACTTGAAGCGGGTTTCGCAACGATCATCCTT**  
**TAAACCAGCCGATGGGTGTTGCGAAACATGTCCACGATTCTAACTTGCCTAACGTCTGCCGGCGAC**  
**CCTGCTGCACAGGCTGTTCCCGCGCTCAGGCTCTGCGCGAACCGCCGGGTGGCGCGTGTGGCG**  
**CCGAAGGCAGCGGGCAACGGCAATATCGCACAGGGCGAGCAGGGCTTTGACACCCTCTTCTCTC**  
**GGACATCTCCCTAGTGGGCCAGCGCACGCCTCTGCTGCTGGGCTTCTTCAACTACTTCGAGCGCCA**  
**CCTCCCGCATGTGGGCTTCTTTGAGCCCATGCCCGGAGCGCTAGCGTCTGCGGATGCGTAT**  
**TGACCGCCACGTTGAGCTGTGAGCGCAGGGGAGGTGCACGGTATACCGGCTGCAGCCAGTCAACC**  
**CAAAGCAGGCGCGGGGCCAGCTATATGCATTGCGTGCGGGTGTTCCGCGGGCGGCTCCACCACC**  
**GCGTGTGCTGCGCTTCCCTGCGTTCCATACGGTGTGCCACCCTGCCACACCGCCACCCAGCG**  
**GCACACAGGCCCCATCCCCAATCCATCCAGGCCGCTTTTCATGCCCTCGCCTCCTCCTCACGCGA**  
**CCCCCTCGCCCCCTCCCTGTATCCAGAGTGTACAAGGTGTTTAACTCAAGGGCGACGTGCGCGCC**  
**ATGACGGCGTGCAGGACGCCGAGGCCGCGCGG**GTGAGCACTGGGTGCTGGGTAGTGGGTGCTG  
 GGTAGTGCGGTCTGGATATGTAGCGCGGGCGGGCGCACACTGGAATGACTGCGACGACATAGGCC  
 GCAGCGCATAGCACCAGCACACCAGTGAACATCCGAAGGCATCCACACCACGCCACCTCGGCGCG  
 CCGTTTATGAACCTTACGCTTTTTTATCAATTGCTGCCGGTGCAG**ATGATCGCCAACGGCCAGCA**  
**CAGCGAGCTGCTGGACAAGATCTACAGCCAGTACGCCTCGTACAAGGAGGGGCGAGGACCTGGTGC**  
**TGGTGGAGGGGCCAGGCCGCTCATGGGCGGCACGGAGCTGGACGCGCAGGTGCGGGCGGGAG**  
**GGGGGGGAGAGTGGGAGCGGGCCTGCGTTCGGGGGAAAGGCTGGAGGTAGGGATGGGGTGAAGTA**  
**GGTTCCAAGAAGCAAATGAAGGGGCGTATGTGCCCGCAAGCACGCAACTCTCTACGCCCGCCTCA**  
**CCCTGCAGATCGCCGCGCCCTGAACGCGCCCGTGTCTCATGACTATGACCGGCCAGCCCAACGCG**  
**ACCGTTGCCGACTACTACAACCGTGCG**GTGAGGGCCCGAGAGGACTGGGCGCCAGTCCATCAGTC  
 AGCAGGGCTGCGGGGCAGGCGCTTTGGGGTAGCAGTCGCCGCTGCTCACAGTGGCGGCTCCATCC  
 ATACCCTAGGGTGTAGCATTGCAAGGACTGGCTGCAGGGAGTTTCGGACCCCGACATGCCCTCGCC  
 TGTTCTTCCCTGCCTCCACCTGCCGCCACCTACCTCTACCTGCCCTCGTCTGCCTCCACCTTCCCC  
 ACGTGCAG**ATGGTGAAGCGGCAGGTGTTCTGGACCACCAGTGGAGGTGCTGGGCTGGTCA**  
**AACGGG**GTGAGAGCCATGGGAGGGGGGGGGCACGGGAATGGAATGAAGTGCGGCATGAGAAGCA  
 GCAGCAGGGCATGGGCATGAGAGGGGCTACCGGGTGTATGCCGGATGGGGAACACTGCACTTAAT  
 GCTGTTGGGAGTGGGGAATAGGAGAGGGTTATTTCCGAGGAGGATGCGGGGCAGAAGGTTGCACC  
 GGGCACAGCTGGGGAGACGCGGTCAAGGAGCCGTCGGGGGCACTTGCATGGGTACGCGGGCCGG

ACTGTGGACGCGTGGTGGTTGACAACGACGGCGGCGCCAACCCGGTCTCACCCGGGACGTGCCCA  
 TACACGCGGCACCGTCCAAGGCCAAACCATCCCAAGTGCCTATTCATGACATATGTATGTTATGAA  
 TAGCTGTTATGGGCCCTGGCGCGGCCTGTCCGCTCGCCGAGCTCGCGAAATGCAGCTGCATGCC  
 CGACATTTTGC CGGAAGAGCTGCTTTAGCCCCGCTAGAGACTCTCGAGCATCTACCTATAGGCAG  
 GCAACGTTGAGATATTGAGGAAATGGCTGCTTGGGGACCTCGGTGCGGAAATGGCTGGTCGGCC  
 ATTCTCGCATTTTGTCTCCGGGATACATTCAAATGCGGTATAATGTGTCTAAATAGCATGTTGAGTGAG  
 TTTATGCCCCCTCCAGCACGTTTCCGCTCGACCGTGCCACACGTACCCATCGAGCTCGCTGGCTC  
 GCTGGCCAAAACAGTCCATTTCCGACCGCAGGCGAGCGTGGACCGCCCTGCCACTCAACCAGCAA  
 GTCAATGCTATGTATGAGAAGTGTCTGAGAGCACGAGGGAGTCAGGGGTGACCTTTTTGCCATCGG  
 GGAACCCCTATCTGCCCCAAGACCCCGCACGGAAGGGCCGTACGGCACTGGGGCAAACCT  
 TCGGACTACGATTTGACATGCTGGGTGCGCGTTAGATTCTAGTCGGACGTTTCCCCGACCG  
 GTTTTGCGGGGTTGAAGCGAGTGCAAATTTGGACGGTGCCACAACGCGGGTGAGACCGGGTTG  
 GCGGCGCACACAGCTGGGCTAGAGCGGGGAAGCGGTCAATGGGAGTGCAGGGCTGTGACGAGCG  
 AGGACAATCGTGAAGCATCGATTCGTTGGAGAGTACGCGGAGGCGTGGCTGGCAGCTTTTCT  
 GCGTTTCGTTGAAGTACAACAATGACATGCGGCCAGTGGCAGGTAGC**TGGAAGCTGTAGAGGGG**  
**AAA**CAAGTGGCGTTTCCACCACACCCGATGCACGCGGCCATGTGCTCACCTACCCCGCCTGTG  
 CCTCTCCTGGCTCCGCAG**CTGCCGCGCCAGTCTCACGCCATCCTGTCCGGCCAGCTCCGGGACA**  
**AGTTCGCGGCGGCGGGGCTGCCCTTCGCCGGCGCCATCCCCACCGACATCATGCTGCGC**CCCTC****tg  
 tgtggaattgtgagcggataacaattcacacaggaacagctatgacatgattacgccaagcgcgaattaacccactaaagggaacaaa  
 gctgggtaccgggccccctcgagcacacacctgtcagaaacacgtctccgccacgctcctctcacggccgaccccgagccctttgccctt  
 tctagccaccgacaggaccagggcgtctcagcatgcctcaacaaccgtactcgtgccagcgggtgcccttgtgctggtgatcgcttgaagcg  
 catgcaagacgaaggggagcagggcggtgctggttcaagggctcggccaggtcgggtgctttctccacgcgcgctccacaccta  
 ccgatgctgaaggcaggaatgctcatggttcccgaactcggagctctaaaagccgcttctgtcgt**cgttccgagacatgtagca**gatcgc  
 agtgcaccttctgacgcgctcggccccatattcggacgcaattgcatgtagcacaattggagcaaatctggcgaggcagtaggcttttaagtg  
 caaggcgagagacaaagtggaacgagcggcgtgattattggtatttacgcgacggccggcgcttagcggccctccccaggccaggacgat  
 tatgtatcaatattgttcggtcgggactcgtgagggctcctcgggctgggagggggatctggaattggaggtacgaccgagatgctgct  
 cggggggaggttctcgcgagcaagccagggtaggtgtgctcctgactcgttgcattctaggacccactgctactacaacaagccat  
 atggacgatcgttgcgactcggggtcggtatcccggttgagtggtggttggaggatggggcctcgggggctggttattcggctcgg  
 ggtggtggcgggaggttgttcaaggtggcagctcggggccggggtgggcttgggtgaggtgagcggctggtggttggcggaggtg  
 ggattccgtaacctcgtgttggagggtggtgggacgagaggtgcctggttggtaaccgaagcgggtccggggcgtccggccagtcgcggt  
 ggcccgaggacagcggctggacgtggcgggtggcgtcgcggggctcgtcgtcgtcgcacgcgctggactgggagcgggtgctgctgatcg  
 agtctcgggtgacggtgccgagggcggccgtgctgctcgtgaaggagcgtcgcactggaggatctggacgaggagcgggaaggggtggtcg  
 ggggagcggcttctcggcagctggagcggactcggcctcgggacgaggatctggcggttggccaggtcacctgtgccggacaacgtgctgct  
 cgacctcgtacctcgaggtgaccgggctgatcagctggggcgggctggcctgctcggaccggcactccgatctcgcgctggtgctgcgcgag  
 ctggcccacgaggagaccggtggtcggcgaggttccgcggcgttctcgggagtagcggcgcggtgggatggggcggtatcggag  
 gaaaagctggcgtt**laccggctgttggacgagttctctc**agatatgaattctcaggt**AAAACGTCGG**TGAGTTTAAGGCCTT  
 TCTCGTGGCCGGCCGGTTGAAGCACGGGCAAGTGACGCCATCCCCAACAAACCTTCCATACCCGT  
 CGCCCACACCTGATACGCAACCCTTCCCTCCCTGACAAGTTGCAACCCTTCTCCCCTGCCCGC  
 GCTGCGCAATAATTAACGCAGC**CTGGACGAGTCCAGACCCGATGGGTGCCAGCGGCTGTACG**  
**GCGACACCTGCTGACGGACGCTGGAGTTCCAGCAGCAGTGGTGGTGCCAGCCAGCGCCTGGAGGA**  
**GCTGCTGGAGATCCTGGCGGAGAGGCCATGGGCAG**GTGCGCGCGGGCGGGGCGGGTGGTGAT  
 GGTGGTGGTGGTGGTGGATTGCAACCCTGCCAGGATCAAGCGTTATAAACCAGGAGGCGCAATTG  
 AAATTACCGAGACGCGTGGGGGAACGCGTAGAGGGCAGGAGGGGCGTTGCGGAGTT**GAGTA**  
**GACGAAGCGGAGCAC**CAGGTGGGGCACGAGGGAAGCGAGAGGTCTACGTGCACCTTTATGAAAA  
 TGAGGCGGGGCGACAATGTCAAATGAAGATGCGCCGCTCATGCGTGTGCCCTTTATCCGTACCA  
 TGCCCTCGCTCACTCCACTTCCCCTTCTACTTCCCCTCGTCTTCAACCCACCGCCATTTGAC  
 AACCCACCTGCTCCTCCTCCTTCTTCTTCTCCTCCTCCACCCGCGTCTTCAG**GCCACTCGTG**  
**GTCACCTCCGCGACCGCCTGGACATCGTGCTGGGGCTGCTGGCGGCACAGCTGTCCGTGTCCGG**  
**CCCCGGCGTGGCCGGCATCCTGCTGACGCAGGCCGGCTCCGCCCGCTCCGGCCGCAACTACGCG**  
**CGTGACACCATCGACCGCATCTTCGCCGGCCTGTCAAGCAGCGGCCTGTACAAGGGCAGCCTGCT**  
**GCCG**GTGAGGCAGGAGGGGGGAGGAGTTGCGGGGCGCGGCTGCGGGGCTTGAGGCGGGCTTC  
 GGGAGGACTGTGGGTGGTGGTGTGGGCATATTCGGGGCGGCCGTGAAGGTATCTGCTGTGAACC  
 CCACAATTCCGCGACTCCCGTGCATCTAGCAGCACCAGCACCAGACTGACACGCCGTGAATGCAT  
 ATGTGGTTGTTTCCGGCTGTGTATCGGCCAG**GTGCTGGTGACGGACATGCCGCTGCGTGACGCCA**  
**TCAGAAAGCTGGACAACCTGGACGCCGATCCTGCCCTCATCCACGCGCAAGATCTCGCAGTGCA**  
**AG**GTGCGGCCGCGGACATGCTGTGGTGGCATAGAGGGCAGAGAAGGGGTGAGAGGGAGGGGTT

GGAGACGGGTAGCGAGGGCCGGTGCAGATACATCAGTTGTTGTGGCATGTCAAGGATGGGCTAC  
 CTCGCCCCACCTCATGCTCGCGACCTCTGTCCCTCGAACCCCCCTTTGCCTCCTTGCCCCCTCTTT  
 TCCCGCAGCGCCTGTTTCGAGCAGTACGTGGACGCCAACGCGGTGGTGGCGCGGCTTCAGAACATG  
 GTGCGCCCCAACCGCATGACGCCAACAGATGTTTCATGCACACGCTCAAGTCCATGTGCAAGTGAGTG  
 CGACGAGGGCCGGGGCTGCGAGCAGTGGGCAACATTGGGGTCTAGAGAAATCGAGTGAGCGGTGC  
 TCAACCGTGGCGGGGGCGAGGGCTGCTGAAGGACTCGGGATGACAACGTGGGCGGCAATAGAGT  
 CCGCGCCGGGCTGACCCTGCCCGTCCACCACATGCCATACCTCCACGCGTCACCGCACCATGTCA  
 CCGGCACACGCCGCCCGCCCCACCACAGCGCCACGCCCCAGCACATTGTGCTGCCCGAGTCGG  
 AGGACAAGCGCGTGTGGCGGGCGGGCGGACGTGGTGCAGCGCGGCTGGCCAAGATCACGCT  
 GCTGGGAGACCCACCACCATCTGTGAGGGAGGCAGAGGCAGGGCGAGTGGGCCCGCGGTCT  
 TGGGCTACTGGGTGGGCTGGGCGCAGCCGCAGGGTTGTGCCGCTGTCGTGCTTTGATGTGATGTG  
 GGGGTAGCTATGTCCAGCCGCCCGCATGCTGCAGAACATGCTTCTGTCACCTGTGTGTGACGG  
 CCTGACAAAAGCAACCTAGCCAGCCTGCCCTGCACCCCTGCTTCCGCCACCGCCGCCACCAGG  
 CCGAGGCGCCAAGCTGGGCTGGACCTGTCGGCTGCAACATCCACAACCCCAACGTGGGTACC  
 GGGCCGACCGGTGGTCCCTGTGGCTGTCCATGGATGGTCTCTGAAATGTGCCGATGTCTCCCT  
 GGGCTGCGCTCCTCACTCCTGCAACTCCTCCTCTTCTCTTCTCGTCCCGCCCTTCTCACTGCAGAC  
 CTCGGACCGGTTTGACAAGTACGTGGACATGCTGGTGGAGGCGAGGAAGAAGAAGGGCATGACGC  
 GCGAGGTGGCGGCCGACACGCTGCACGGTACGCGGGTGCGGGGCAGGTGACCCGAGTTGAGGTG  
 GAACGGGGTGGAGCAGTGGCAGGACTGCAAGGTGCTTTTTCACTTCGCTCCGTAGCGTTTCGGCGTC  
 GCAGGGTGTACACTGTGCGAGTATGCCGAGTTGTATAAACTTTGGTTTCTTACACGTCAAACAAAC  
 GCACACAGGCGACGTGAACTTCTTTGCCACCATGATGATCGTCGCGGGCGACGCCGACGGCATGGT  
 GTCGGGGCGGGTGCACACCACCGCTCCACCGTGGCCCCGCGCTGCAGGTGCGCCGTGCTCTCT  
 GGGACTTCGCCCTGCTTGGCCTCCACCACTTGGAGGGCCGCGCTGTTGGCATGTTGGCGGATTTGT  
 GGCTGTGCCCTGTTGCTGCACGTTTACTCTCTCCATCGGCTTTCGCTGGCGCACGCGTTCTCAA  
 ACAGGGCATAGAACAATGCACACACGCTCTCATGCACACTACCGCAGGTGCTCAAGAGCCCCGAC  
 ACCCCGCTGGTGTCTCGGTCTTCATCATGTGCTGCCGACCGAGTGGTGGTGTACGGCGACTGC  
 GCCGTCAACGTCAACCCCTCCGCCGCCGACCTGGCGCAGGTGCGTCCGCAGCCGCGACGACCGGT  
 GTTGCCCCTGCACATTAACGAACGGGCGCCCTGCGCTGCACGCACGGACTTGAGGAAAGCAAGTA  
 CCGTTTGGTCACTCCGTTGCTCTACAATATTCTCACAGTTTTTGGGCTGAGCCCCCCAGCGAAGCG  
 TTCCAGGGGGGGGGCGAAGCCCCCAGGAACACCCTGTCCGTGCGTGCCTGCGTGGTGTCCGGC  
 AAAACATAGCATACTGGCACAACCCGCGACTGCTACGTAAGTATTTGTTAATGCCTATTGCATGTA  
 AATAGGTGGCAGGGAAAATTCGGGCGGAGCGAGAAGTGCCTTCGCGCGTCCATGGAAATTGACTTT  
 CGCGAGGTCGCGAGGAAAGCATCCGGTGCCTGCCGATATGCAGTCTATAAGGCAAATGTTGGC  
 GGCAAGCAAAGCGGGGAAGTATATCGAAAGTCTTTGAGCGACTTGCCTGCCATGCCTGCCGACGC  
 GCCAGAATGCCGAGAAGCCCCGAGGTGCCCCCCGCCCGCGCCTAGCCCTTTGAGCGTGGGGCG  
 CCGGGGAGGTGTTGAGTATGGCAGGAGGCGAAAGAAATGCTTGGGGTGTGGGAACGTGACAAG  
 GCACGCATGTGGCGCGGCCCAACCCGAGTGTCCCTAGCCGATGCGCCTGCGCGTCTGAGCGGCA  
 TGGAGGCTCTGACGGGGCGTTACACGCCTATTAGCTCCCAAGCGTACGGGGGCTCAGCCCATTTTC  
 CAGTGTACAAAGCTGACACCCCTTGTGGTGGCTGAGCCCCCAGCGAAGCGTTCCAGGGGGGG  
 GGGGCGAAGCCCCAGGAACACCCCTGTCCGTGCGTTTCAAGAAAAGCGTGCAGGGCCGGGGA  
 GGGGGAGGCCGAGGAGGGGAGGTGACGGGCAAAGGGTTTTAGGGGCGAGGCAGACGTGAGAAC  
 GGATAGCAAATGTGAATGAAAAGCAAAGAATATGTAGCGGGCGCAAACCCGCGCAAAGCGATCGTC  
 GGCAAACATAGCATACTGGCACAACCTGCGACTGCTACGTAATAGTATTTGTTAATGCCTATTGCAT  
 GTAAATAGGTGGCAGGGAAAATTCGGGCGGAGCGAGAAGTGCCTTCGCGGTGCCATGGAAATTGAC  
 TTTCCGAGGTCGCGAGGAAAGCATCCGGTGCCTGCCGATATGTAGTCTATAAGGCAAATGTT  
 GGCGGCAAAGCAAAGCGGGGAAGTATATCGAAAGTCTTTGAGCGACTTGCCTGCCATGCCTGCCGA  
 CGCGCCAGAATGCCGAGAAGCCCCGAGGTGCCCCCCGCCCGCGCCTAGCCCTTTGAGCGTGGG  
 GCGCCGGGGAGGTGTTGAGTATGGCAGGAGGCGAAAGAAATGCTTGGGGTGTGGGAACGTGAC  
 AAGGCACGCATGTGGCGCGGGAATCCCGCACGGCCCCAACCCGAGTGTCCCTAGCCGACGCGCA  
 GGCGCATCGTAGCGGCATGGAGGCTCTGACGGGGCGTTACATGCTTATTAGCTCCCAAGCGTACGG  
 GGGCTCAGCCATTTTCCAGCTGTACAAAGCTGACACCCCTTGTCTTGCCTGGTGTGGCCGTGCC  
 CGGCTGCTGTTGCGCAGATCGCCATCACCTCCAACGACACCGCCGCGGCTTCGGCATCGAGCC  
 GCGCGTGGCCATGCTGTCTACTCCACGCTGGGCTCCGGCTCCGGCCCCGACGTGAGTTGCTTG  
 ACGGGGACTGGGGCTTCGGAGTTTGGGGAGGCGTGGGGAAAGTCCGCGTGATAGTGCGGCAGGG  
 AGCCTGAGCGGGGTGGGCGTGGATTGGCTAAGATTGGCATGACCTGTGCGGCCATTGAAACAAGG  
 CTCCTTCCGCGTTTTATCTTACCGCCACAGGTCCAGAAGGTGAGCGAGGCTGTGGCCATCGTGA

AGCAGCGGCGGCCGACATCAAGGTGGAGGGACCCATCCAGTACGACGCTGCCATTGACCCCAAG  
 GTGCGTTGCGCGGCATTTATTTTCGGGGTTTACTATCTTGTGAAGGGCTTGCCTGGCTTGATGAT  
 ACCGGTATGGAATGAAGCGCGTGGATGAGGCGGCGGTAAGTTTGGCACTCTGCCGGCGAACGAGC  
 ACACGCACATTGGTACTGGCTTGGTGTGTCCACTATGCAAGTTCCTCTCCCTAATGTTGGTGTGG  
 CACGCGTGCCTGTGCAGGTGGCGGGTCAAGGTGCAGGGCCTAAGCGAGGTGGCGGGCAAGG  
 CCACCGTGTTCATCTTCCCCGACCTCAACACCGGTGCGTGGCGGCCAAAGGGAGGCCACTGAAAG  
 GGGGTGGCGGCCGCTGCCTGTGTATGGTTATCTGCTTGCCTGGGCTACACAAACGGCAATGT  
 CACTGTGCAATGCCGTTGCGCTTTCGCCCGGTGTTCTGGCATCCCCACTAACCATCATGCCGCT  
 GCCTCGTGCCTCCTTACATGTCATGATATACGCAGGCAACAACACGTACAAAGCGGTGCAGCAGT  
 CCACGGGTGCCATCGCCATGGGCCCGTGCATGCAGGTGCGGGCGTGTTCCTCGAGTGCCGGTTGG  
 GATTCTGCTTTTACCTGTTGAACCAACTGGGCTCGGGTGCATGTGGGAACCAGAGCCAGGTGCATGTT  
 GGCATCACCGTGCAGTGTGGGGCTGGCCGAGAAATCAGTCGTGCTGCCAGACCCACATTAGACATC  
 CGGCTGCTGACGCACTTCTTTCTTCCATCCGCCCTCGCCGCGCAGGGTCTACTCAGGCCCGTG  
 AACGACCTGTCCCGCGGCTGCACGGTGCACGATCATCAACACCATCTGCGTCCATCCATCCG  
 GCCTCCCGCATGTCATCCGCGCTCGCGCGGCTGCCAAGGCTGCCGTCGCGGCCGCTTTAAGG  
 CAGCAGCAGCAGCCGCGGGCAGCAGCGGGGCGAGCTAGTTGGGTGGGCATTGACAGACAAA  
 GCGGCCGGAACAGGGATATATGCGCGCGAGCCGTTTCGCTGGCTGAGCAAGCCAGGAGGCAGG  
 GTCACAGGTTGTGCCGGCGAAACGAGCGCAGGCAAGAGGCGGCCGGCGTGAACGCTGGCTGG  
 TGTTGGGCTGATGGGGCTGATCATGGAGCAGTGCCGCTTGCATCTTCGGGGAGCAGTGCCGCTTG  
 GCCAATGACAGGGCGCTCTTGGTTGTGTAGGGCGGGCGCTTGCCTGCGCGGTGACCGGGCGGT  
 GCTGAGGGGACGACGTGGTAATAGCACATGGCAATTCATAGGTCGAGTGCTTCATTAACAGGTTTGG  
 TTTTGTAGTGTGCTGCTTGGGTTATATGTTTGTGCTGGCGCGCAGGGCACTAAGGCTGAGCTGG  
 TGGCCTAGGTGGTGTGAGTCTGGTATGCCGGGTGTCGTGAGATGAGAAGGGCGGTGGCGGTGG  
 ACAACAGCAGGTAGAATACCGTACAGCCGCCATGATGCAGATATCACGAAGATAATAAGGAACCTTG  
 GCCCGGCCACGTCCGGCTTGGTGTATGTGTTTGCATTATTTTTTGGTGTGCAAGGTTGCCGAAAA  
 GCAAGCCATGGCTTTGCGCAGTATGACTTCTGTACGTGTAATGTGCTACAAAGACACAGCAGACG  
 GCGAGCCGTCATAAAGAGCCTGTCACCGTTGTCCATTTCTGTAGCGGCTCGCTCTCACGCCTCTTTC  
 TTCTGGTCCGAGCGCAGACCTGCTACAACCTGCGGGTGTGAGGAGATGGCCATCAAGCGGCTTGG  
 GGGGTGAAGGAGGGGCGAGCGGCCCTGGTCAGTCAAAGTCTGCAACGACTGCTTGACGACCTGGG  
 TGAGGACCGTGCATGTGCGGGGACGGCTGGGCACTGGGGACGGATTGATTGACAGGTTGACGGTT  
 GAAACAGCTCATGTGCGCTCTCTTCTTCTCCCGTTCCCATCCCCAGAACCAGCGACGTCTCCGCC  
 GCCAACGTGATCCGTGTGCTCCTGCTGAAGCTGATGGGCTTCGAGCGGCCGACCAAGCTGCAG  
 CGGCCACCATGGCCGCCGGCGGTGGCGGGGCGGGCTGAGAGCCTGAACGGCGCTAGCAGGGC  
 GTGGGGCTGAGGGTGCACGTGCCGATTGGCGGCGAGTGACGTGACTAGTTTGTAGCTGCGGGTT  
 AGCACGGACTGTGCACCCACCCAACCGGCCACGTCCGGATTTGCGGGGATGCCAAAGGCCCCCA  
 ACATAGAGGCGTGTGCTTAGTAGGCGCCGCGTCAAGGTGGCGGGGTTAATAACGACCCGGGATC  
 AGCCCTTTTCTGCCATAAAGGCGACCCACCTCCTTGTGGTGTGCAAAAGAATGAATGCAATAAATG  
 CCAAATTATTGCATGCGGGTGCAGGACCATGATGGTCAGGGATGGCCGACACCGTACGTGGTCA  
 TGTGAAGTGACATTACAAGTGTGATGGCCCTTACGTGGCTCTTCCACTGATGAGTGTATGTAGT  
 GGCATGACTGGGATGAAGTGTCTACCAGCTGTGCAATCCGATAGAAAGAGACGAGCGTGCAG  
 GATTGCATCGGAGCGCCCTGCATTGGTGCCTTGCACAGGCATCAGGGCTGGGGGAGCGAGCTGC  
 CTTGAGGGAAGGGCGTGGATGTTGTTGGGAAAGGCATCACCGGGTAAATTGTGTCGTGTAACAAT  
 TGAAACGG

### **pat2-1 CDS SEQUENCE**

ATGTCTCTGAACAGTAGCACTATGTCGCGCCGGCAGGCGGTGGCCGGGGCCCCGGCAGTGGCGCC  
 GTTCCGACACGCCGGGCTGTTCCCGCGCGTCAGGCTCTGCGCGAACCCGCCGGGTGGCGCGTGTG  
 GCGCCGAAGGCAGCGGGCAACGGCAATATCGCACAGGGCGAGCAGGGCTTTGACACCCTCTTCT  
 CTCGGACATCTCCCTAGTGGGCCAGCGCACGCCTCTGCTGCTGGGCTTCTTCAACTACTTCGAGCG  
 CCACCTCCCGCATGTGGGCTTCTTTGAGCCATTGCCGCCGAGGCGCTAGCGTCTCGGAGCTGC  
 GTATTGACCGCCACGTTGAGCTAGTGTACAAGGTGTTTAACTCAAGGGCGACGTGCGCGCCATGA  
 CGGGCGTGCAGGACGCCGAGGCCGCGCGGATGATCGCAACGGCCAGCACAGCGAGCTGCTGGA  
 CAAGATCTACAGCCAGTACGCCTCGTACAAGGAGGGGCGAGGACCTGGTGTGTTGGAGGGGCCAG  
 GCCCGCTCATGGGCGGCACGGAGCTGGACGCGCAGATCGCCGCCGCCCTGAACGCGCCCGTGTCT  
 CATGACTATGACCGGCCAGCCCAACGCGACCGTTGCCGACTACTACAACCGTGCATGGTGAAGCG

GCAGGTGTTCTGGACCACCACGTGGAGGTGCTGGGCCTGGTCATGAACGGGCTGCCGCGCCAGT  
 CTCACGCCATCCTGTCCGGCCAGCTCCGGGACAAGTTCGCGGGCGCGGGGCTGCCCTTCGCCGGC  
 GCCATCCCCACCGACATCATGCTGCGCCCTCgtgtggaattgtgagcggataacaatttcacacaggaacagctatgac  
 catgattacgccaagcgcgcaattaaccctcactaaagggacaacaaagctgggtaccgggccccccctcagcacacacctgtcagaaacacg  
 tctccgccacgtctccctctcacggccgaccccgagccctttgccccttctagggcaccgacaggaccagggcgtctcagcatgctcaaca  
 acccgactcgtgccagcgtgcccctgtgctggtgatcgttgaagcgcagcgaagacgaaggggaggagcagggcctggctgtcgaag  
 ggctcggccagttcgggtgcctttctccacgcgcgctccacactaccgatcgtgaagcaggcaaatgctcatgttgccgaactcggagt  
 ccttaaaaagccgctctgtcgtcggtccgagacatgtagca gatcgcagtgccaccttctgacgcgctcggccccatattcggacgcaattgtca  
 ttgtagcacaattggagcaaatctggcgaggcagtaggctttaagtgcgaaggcgagagagcaaatgggacgcggcgtgattattgtattacg  
 cgacggccccggcggttagcggccctccccaggccagggacgattatgtatcaatattgttgcgttcgggcactcgtgcgagggctcctgcgggc  
 tggggaggggagctgggaattggaggtacgaccgagatggcttgcctgggggaggtttcctcgcgagcaagccagggttaggtgtgctct  
 tgactcgtgtcattctaggacccccactgctactcacaacaagcccatatggacgatcgttgcgtgactgcggggtcggatccccggtgtgagtg  
 ggtgtgtggaggatggggcctcgggggctggtgttatcggctcgggggtggtgggggaggtttttgcaaggtggcagctcggggcgggggt  
 gggctgtgggtgaggtgagcggctggtgtggtggcgagggtgggattcccgtacctcgtgtgtgaggggtggtggggacgagagggctcgc  
 tggttggtcaccgaagcggctcggggcgtccggccagtcgcggtggccgcgggagcagcggctggacgtggcgggtgctcgcggggctc  
 gctcgtcgtcagcgcgtgactgggagcgggtgctcgtcagtcgcagctcgcggtgacgggtccgcaggcggcccgctgctcgtcgaagg  
 agcgtcgaattggaggatctggacgaggagcgaaggggtgctcggggagcggcttctcggcagctggagcggactcggcctgcggaagcga  
 ggtatcggcgggttgccacggtcacctgtgcccggacaacgtgctgctcgcacctcgtcaggtgacgggtgaccgggtgatcggcgtggtggcggt  
 cggcctgcgggaccggcactcagatcgcgctgtgctgcgcgagctggcccacgaggaggaccctggttcggggcggaggttccgcggcg  
 ttctcggggagtagcggcgcggtgggatggggcgggtatcggaggaaaagctggcgtttaccggctgtggacgagttctctgagatatcgaatt  
 ctcaggtAAAACGTCCGCCTGGACGAGGTCCAGACCGCCATGGGTGCCAGCGGCTGTACGGCGAC  
 AGCCTGCTGACGGACGTGGAGTTCGACGACGTGGTGGTGCCAGCCAGCGCCTGGAGGAGCTGCT  
 GGAGATCCTGGCGGAGAGGCCCATGGGCAGGCCACTCGTGGTACCTCCGCGGACCGCCTGGACA  
 TCGTGCTGGGGCTGCTGGCGGCACAGCTGTCCGTGTCCGGCCCCGGCGTGGCCGGCATCCTGCT  
 GACGCAGGCCGGCTCCGCCCGCTCCGGCCGCAACTACGCGCTGACACCATCGACCGCATCTTCG  
 CCGCCTGTCAAGCAGCGGCCTGTACAAGGGCAGCCTGCTGCCGGTGTGGTACGGACATGCCG  
 CTGCGTGACGCCATCAGAAAGCTGGACAACCTGGACGCCGCCATCCTGCCCTCATCCACGCGCAAG  
 ATCTCGCAGTGCAAGCGCCTGTTTCGAGCAGTACGTGGACGCCAACGCGGTGGTGGCGCGGCTTCA  
 GAACATGGTGCGCCCAACCGCATGACGCCAAGATGTTTCATGCACACGCTCAAGTCCATGTGCAA  
 CGCCACGCCCCAGCACATTGTGCTGCCCGAGTCGGAGGACAAGCGCGTGCTGGCGGGCGGGCGG  
 GACGTGGTGCAGCGCGGCCTGGCCAAGATCACGCTGCTGGGAGACCCACCACCATCCTGGCCGA  
 GGCGGCCAAGCTGGGCCTGGACCTGTCCGGCTGCAACATCCACAACCCCAACACCTCGGACCGGT  
 TTGACAAGTACGTGGACATGCTGGTGGAGGCGAGGAAGAAGAAGGGCATGACGCGCGAGGTGGCG  
 GCCGACACGCTGCACGGCGACGTGAACCTTTGCCACCATGATGATCGTCGCGGGCGACGCCGA  
 CGGCATGGTGTCCGGCGCGGTGCACACCACCGCCTCCACCGTGCGCCCGCGCTGCAGGTGCTCA  
 AGAGCCCCGACACCCCGCTGGTGTCTCGGTCTTCATCATGTGCTGCCCGACCGAGTGGTGGTGT  
 ACGGCGACTGCGCCGTCAACGTCAACCCCTCCGCCCGGACCTGGCGCAGATCGCCATCACCTCC  
 AACGACACCGCGCGCCTTCGGCATCGAGCCGCGGTGGCCATGCTGTCCTACTCCACGCTGGG  
 CTCGGCTCCCGCCGACGTCCAGAAGGTGAGCAGGCTGTGGCCATCGTGAAGCAGCGGCGG  
 CCGACATCAAGTGGAGGGACCCATACAGTACGACGCTGCCATTGACCCCAAGGTGGCGGCGGT  
 CAAGGTGCAGGGCCTAAGCGAGGTGGCGGGCAAGGCCACCGTGTTCATCTTCCCGACCTCAACA  
 CCGGCAACAACAGTACAAGCGGTGCAGCAGTCCACGGGTGCCATCGCCATGGGCCCGTTCATG  
 CAGGGTCTACTCAGGCCGTGAACGACCTGTCCCGCGGCTGCACGGTGGCCGACATCATCAACACC  
 ATCTGCGTCACCTCCATCCAGGCCTCCCGCATGTCATCCGCCGCTCGCGCCGCGGCTGCCAAGGT  
 GCCGTCGCGGCCGTTAA

### **pat2-2 GENOMIC SEQUENCE**

CAGACTACCAAGCGATCTACACATATAACAACCGCCGTCCTAGACTAGGACACCGTGCCTCAA  
 TTACCGCAGCAACAGTCTGCCGCGTTTGCTTGTACCGATTGGTGCATCTGACTGCATCTTACGACGT  
 TATACATAATAAATTTGAGGATCAACGTGAAACACCAGCCACACGATAATCGAATACTTTCCGGCTCG  
 AAGCGGCCACAGAGCAACTTCAGCTCCGACAAAAGCTATCGGAGTATGTCTCTGAACAGTAGCACT  
 ATGTCGCGCCGGCAGGCGGTGGCCGGGGCCCCGGCAGTGGCGCGGTTCCGACACGCCGGGTGG  
 GTGCTGGATCGCCTGGGAAGTGGGTGGGCGCAAGTGTGAATGTGAAGACGATGCTGTGATGAAAC  
 AAACGATTCTAGGCTGCACGTGAGCCAGCGCTTGTGGTTCGGTTCGGCCACCTGCTTGGGGGTT  
 CTAACCTCGAAACGCCGACTGAAAGCAAGCTCTATCACTTGAAGGCGGGTTTTCGCAACGATCATCCTT

TAAACCAGCCGTATGGGTGTTGCGAAACATGTCCACGATTCTAACTTGCGTAACGTCTGCCGGCGAC  
 CCTGCTGCACAGGCTGTTCCCGCGCGTCAAGGCTCTGCGCGAACCGCCGGGTGGCGCGTGTGGCG  
 CCGAAGGCAGCGGGCAACGGCAATATCGCACAGGGCGAGCAGGGCTTTGACACCCTCTTCTCTC  
 GGACATCTCCCTAGTGGGCCAGCGCACGCCTCTGCTGCTGGGCTTCTTCACTACTTCGAGCGCCA  
 CCTCCCGCATGTGGGCTTCTTTGAGCCATTGCCGCCGAGGGCGCTAGCGTCTGCGGAGCTGCGTAT  
 TGACCGCCACGTTGAGCTGTGAGCGCAGGGGAGGTGCACGGTATACCGGCTGCAGCCAGTCAACC  
 CAAAGCAGGCGCGGGGCCAGCTATATGCATTGCGTGCGGGTGTTCGCCGCGGGCGGCTCCACCACC  
 GCGTGCTGCCTGGCGCTTCTGCGTTCCATACGGTGTGCCACCCTGCCACACCGCCACCCAGCG  
 GCACACAGGCCCCATCCCCAATCCATCCAGGCCGCTTTCATGCCCTCGCCTCCTCCTCACGCGA  
 CCCCTCGCCCCCTCCCTGTATCCAGAGTGTACAAGGTGTTTAACTCAAGGGCGACGTGCGCGCC  
 ATGACGGGCGTGCAGGACGCCGAGGGCCGCGCGGTGAGCACTGGGTGCTGGGTAGTGGGTGCTG  
 GGAGTGCGGTCTGGATATGTAGCGCGGCGGGGCGCACACTGGAATGACTGCGACGACATAGGCC  
 GCAGCGCATAGCACCAGCACACCAGTGAACATCCGAAGGCATCCACACCAGCCACCTCGGCGCG  
 CCGCTTCATGAACTTTACGCTTTTTTATCAATTGCTGCGGTGCAGATGATCGCCAACGGCCAGCA  
 CAGCGAGCTGCTGGACAAGATCTACAGCCAGTACGCCTCGTACAAGGAGGGGCGAGGACCTGGTGC  
 TGGTGGAGGGGCCAGGCCGCTCATGGCGGCGACGGAGCTGGACGCGCAGGTGCGGGCGGGAG  
 GGGGGGAGAGTGGGAGCGGGCCTGCGTTCCGGGGAAAGGCTGGAGGTAGGGATGGGGTGAGTA  
 GGTCCAAGAAGCAAATGAAGGGGCGTATGTGCCCGCAAGCACGCAACTCTCTACGCCCGCCTCA  
 CCCTGCAGATCGCCGCGCCCTGAACGCGCCCGTGCTCATGACTATGACCGGCCAGCCCAACGCG  
 ACCGTTGCCGACTACTACAACCGTGCGGTGAGGGCCCGAGAGGACTGGGCGCCAGTCCATCAGTC  
 AGCAGGGCTGCGGGGCAGGCGCTTTGGGGTAGCAGTCGCCGCTGCTCACAGTGGCGGCTCCATCC  
 ATACCCTAGGGTGTAGCATTGCAAGGACTGGCTGCAGGGAGTTTCGGACCCCGACATGCCCTCGCC  
 TGTTCTTCCCTGCCTCCACCTGCCGCCACCTACCTCTACCTGCCCTCGTCTGCCTCCACCTTCCCC  
 ACGTGCAGATGGTGAAGCGGCAGGTGTTCTGGACCACCACGTGGAGGTGCTGGGCCTGGTCATG  
 AACGGGTGAGAGCCATGGGAGGGGGGGGGCACGGGAATGGAATGAAGTGCGGCATGAGAAGCA  
 GCAGCAGGGCATGGGCATGAGAGGGGCTACCGGGTGTATGCCGGATGGGGAACACTGCACTTAAT  
 GCTGTTGGGAGTGGGGAATAGGAGAGGGTTATTTCCGAGGAGGATGCGGGGCGAGAAGTTGCACC  
 GGGCACAGCTGGGGAGACGCGGTCAAGGAGCCGTCGGGGGCACTTGCATGGGTACGCGGGCCGG  
 ACTGTGGACGCGTGGTGGTTGACAACGACGGCGGCGCCAACCCGGTCTCACCCGGGACGTGCCCA  
 TACACGCGGCACCGTCCAAGGCCAAACCATCCCAAGTGCCTATTTCATGACATATGTATGTTATGAA  
 TAGCTGTTATGGGCCCTGGCGCGGCCTGTCCGCTCGCCGAGCTCGCGAAATGCAGCTGCATGCC  
 CGACATTTTGCGCGAAGAGCTGCTTTTAGCCCCGTAGAGACTCTCGAGCATCTACCTATAGGCACG  
 GCAACGTTGAGATATTGAGGAAATGGCTGCTTGAGGGACCTCGGTGCGGAAATGGCTGGTCGGCCG  
 ATTCTCGCATTTTGTCCGGGATACATTCAAATGCGGTATAATGTGTCTAAATAGCATGTTGAGTGAG  
 TTTATGCCCCCTCCAGCACGTTTCCGCTCGACCGTGCCACACGTACCCATCGAGCTCGCTGGCTC  
 GCTGGCCAAAACAGTCCATTTCCAGCCGACGGCGAGCGTGGACCGCCCTGCCACTCAACCAGCAA  
 GTCAATGCTATGTATGAGAAGTGTCTGAGAGCACGAGGGAGTCAAGGGGTGACCTTTTTGCCATCGG  
 GGAACCCCTATCTGCCCCCAAGACCCCGCGCACGGAAAGGGCCGTACGGCACTGGGGCAAAC  
 GTTTTGCGGGTTGAAGCGAGTGCAAATTTGGACGGTCCCACAACCGGGGTGACCGGGTGG  
 GCGGCGCACACAGCTGGGCTAGAGCGGGGAAGCGGTCAATGGGAGTGCAGGGCTGTGACGAGCG  
 AGGACAATCGTGAGCGATCGATTTCCGGTGGAGAGTACGGCCGAGGCGTGCCTGGCACGTTTCT  
 GCGTTTCCGTTGAAGTCAACAATGACATGCGGCCAGTGGCAGGTAGCTGGAAGCTGTAGAGGGG  
 AAACAAGTGGCGTTTCCACCACACACCGCATGCACGCGGCCATGTGCTCACCTACCCCGCCTGTG  
 CCTCTCCTGGCTCCGCAGCTGCCGCGCCAGTCTCACGCCATCCTGTCCGGCCAGCTCCGGGACA  
 AGTTCCGCGCGGGCGGGGCTGCCCTTCGCCGGCGCCATCCCCACCGACATCATGCTGCGCAACGTC  
 CGGTGAGTTTAAAGCCTTTCTCGTGGCCGGCCGGGTTGAAGCACGGGCAAGTACGCCATCCCCAA  
 CAAACCTTCCATACCCGTCGCCACACCTGATACGCAACCCTTCTCCCCTGACAAGTTGCAACCCT  
 TCCTCCCCTGCCCGCACGCTGCGCAATAATTAACGCAGCCTGGACGAGGTCCAGACCGCCATGGGT  
 GCCAGCGGCTGTACGGCGACAGCCTGCTGACGGACGTGGAGTTCGACGACGTGGTGGTGGCCAG  
 CCAGCGCCTGGAGGAGCTGCTGGAGATCCTGGCGGAGAGGCCATGGGCAGGTGCGCGGCGGGC  
 GGGGCGGGTGGTGTGTTGGTGGTGGTGGTGGATTGCAACCCTGCCAGGATCAAGCGTTATAAA  
 CCAGGAGGCGCAATTGAAACTTACCGAGACGCGTGGGGGGAACGCGTAGAGGGGCGAGGAGGGC  
 GTTGCAGGATTGAGTAGACGAAGCGGAGCACCAGGTGGGGCACGAGGGAAAGCGAGAGGTCTACG  
 TGCACCTACCAATCGTCACACGAGCCCTCGTCAGAAACAGTCTCCGCCtgtgtggaattgtgagcggataaca  
 atttcacacaggaacagctatgaccatgattacgccaagcgcgcaattaaccctcactaaaggaacaaaagctgggtaccgggccccctc

gagcacacacctgtcagaaacacgtctccgccacgtctccctctcacggccgacccccgagccctttgcccttctagggcaccgacaggacc  
caggcgctctcagcatgctcaacaacccgtactcgtgccagcgggtgcccttgtgctggtgatcgttgaagcgcagcgaagcgaaggggagc  
gagcaggcggcctggtgtcgaagggctcgcgccagttcgggtgcctttctccacgcgcctccacacctaccgatcgtgaaggcaggcaa  
atgctcatgtttgcccgaactcggagtcctaaaaagccgctcttctgtcgtcgttccgagacatgtagcaatgatcgcagtgccaccttctgacgcgctc  
ggccccatattcggacgcaattgtcattttagcacaattggagcaaatctggcagggcagtaggctttaaagttgcaaggcagagagcaaaagt  
ggacgcggcgtgattattggtattacgcgacggcccgccgctgtagcggcctccccagggcagggacgattatgatcaatattgttgcgttcgg  
gcactcgtgcgagggctcctgcccgtggggaggggatctgggaattggaggtacgaccgagatggctgctcgggggagggttcctcgccga  
gcaagccagggttaggtgtgctcttgaactcgttgcattctaggacccccactgctactcacaacaagccatattggacgatgcttgcgtgact  
gccccgtcggtatccccgttgcgtgagtggttgcgtgaggatggggcctcgggggctggtgttatcggctcgggggtggtggcgggagttgttgc  
aaggtggcagctctggggccgggggtggcctgttgggtgaggctgagcggctggtgtggtggcggaggtggggattcccgtacctcgttgtg  
aggggtggtgggacgagaggggtcctggtgtggtcaccgaagcgggttccggggcgtccggccagtgccgggtggcggcgggagcagcggctg  
gacgtggcgggtggcgtcgcggggctcgtcgttcgctgcacgcgctggactgggagcgggttccgttcgatcgcagtcctcgcggtgacggtgccc  
caggcggcccgtgctgctgaagggagcgtcactggagatctggacgaggagcgggaaggggtggtcgggggagcggcttctcggcag  
ctggagcggactcggcctcggacgaggatctggcggtttgcacggtcacctgtgcccggacaacgtgctgctgaccctcgtacctgcgaggtg  
accgggctgatcagctggggcgggtcggcctgctggaccggcactccgatctcgcgtggtgctgctgagctggcccacgaggaggaccg  
tggtcgggcccggaggttccgcggcgttctcgggagtagcgggagcggggtgggatggggcggatcggagga aaagctggcgttttaccggctg  
ttggacgagttctctgagatatcgaattctcaggtTTATGAAAATGAGCGGGGGCGACAATGTCAAATGAAGATGCG  
CCGCTCATGCGTGTGCCCTTTATCCGTACCATGCCCTCGCTCACTCCACTTCCCGGTTCTACTTC  
CCCCTCGTCTTCAACCCACCGCCATTTGACAACCCACCTGCTCCTCCTCTCCTTCTGCTCT  
CCTCCTCCACCCGCGTCTTCAGGCCACTCGTGGTCACTCCGCGACCGCCTGGACATCGTGTGG  
GGCTGCTGGCGGCACAGCTGTCCGTGTGGGCCCGCGCGTGGCCGGCATCCTGCTGACGCAGGC  
CGGCTCCGCCCGCTCCGGCCGCAACTACGCGCGTGACACCATCGACCGCATCTTCGCCGGCCTGT  
CAAGCAGCGGCCTGTACAAGGGCAGCCTGCTGCCGGTGAGGCAGGAGGGGGGAGGAGTTGCGG  
GGCGCGGCTGCGGGGCTTGAGGCGGGCTTCGGGAGGACTGTGGGTGGGTGGTGTGGGCATATTC  
GGGGCGGCCGTGAAGGTATCTGCTGTGAACCCACAATTCCGCGACTCCCGTGCATCTAGCAGCAC  
CAGCACCGACACTGACACGCCGTGAATGCATATGTGGTTGTTTCCGGCTGTGTATCGGCCAGGTG  
CTGGTGACGGACATGCCGCTGCGTGACGCCATCAGAAAGCTGGACAACCTGGACGCCGCCATCCT  
GCCCTCATCCACGCGCAAGATCTCGCAGTGCAAGGTGCGGCCGCGCGCACATGCTGTGGTGGCATA  
GAGGGCAGAGAAGGGGTGAGAGGGAGGGGTTGGAGACGGGTAGCGAGGGGCCGGTGCAGATACA  
TCAGTTGTTGTGGCATGTCAAGGATGGGCTACCTCGCCACCTCATGCTCGCGACCTCTGTCCCTC  
GAACCCCTTTGCCTCCTTGCCCCCTTTCTCCCGCAGCGCCTGTTTCGAGCAGTACGTGGACGC  
CAACGCGGTGGTGGCGCGGCTTCAGAACATGGTGCGCCCAACCGCATGACGCCCAAGATGTTTAT  
GCACACGCTCAAGTCCATGTGCAAGTGAGTGCGACGAGGGCCGGGGCTGCGAGCAGTGGGCAACA  
TTGGGGTCTAGAGAAATCGAGTGAGCGGTGCTCAACCGTGGCGGGGGCGAGGGCTGCTGAAGGGA  
CTCGGGATGACAACGTGGGCGGCAATAGAGTCCGCGCCGGGCTGACCCTGCCCGTCCACCACATG  
CCATACCTCCACGCGTCAACGCACCATGTCAACGGCACACGCCGCCCGCCCCACCACAGCGC  
CACGCCCCAGCACATTGTGCTGCCCGAGTCGGAGGACAAGCGCGTGCTGGCGCGCGCGGGAC  
GTGGTGCAGCGCGGCTGGCCAAGATCACGCTGCTGGGAGACCCACCACCATCCTGGTGAGGGA  
GGCAGAGGCGAGGCGAGTGGGCCCGCGGTCTGGGCTACTGGGTGGGCTGGGCGCAGCCGCGAGG  
GTTGTGCCGCTGTGCTGCTTTGATGTGATGTGGGGTAGCTATGTCCAGCCGCCGCGATGCTGCA  
GAACATGCTTCTGTACCTGTGTGTGTGACGGCCTGACAAAAGCAACCTAGCCAGCCTGCCCTGC  
ACCCCTGCTTCCGCCACCGCCGCCACCAGGCCGAGGGCGGCAAGCTGGGCCTGGACCTGTCCG  
GCTGCAACATCCACAACCCCAACGTGGGTACCGGGCCGACCGGTGGTCCCTGTGGGCTGTCCAT  
GGATGGTCTCTGAAATGTGCCGCATGTCTCCCTGGGCTGCGCCTCCTCACTCCTGCAACTCCTCT  
CTTCTCTTCTCGTCCCGCCTTCTCACTGCAGACCTCGGACCGGTTTGACAAGTACGTGGACATGCTG  
GTGGAGGCGAGGAAGAAGAAGGGCATGACGCGCGAGGTGGCGGCCGACACGCTGCACGGTACGC  
GGGTGCGGGGACGGTACCCGAGTTGGAGTGGAACGGGGTGGAGCAGTGGCAGGACTGCAAGGT  
GCTTTTTCACTTCGCTCCGTAGCGTTCGGCGTGCAGGGTGTACACTGTGCAGTATGCCGCAGTT  
GTATAAATTTGTTTTCTTACACGTCAAACAACGCACACAGCGCAGCTGAACTTCTTTGCCACCATG  
ATGATCGTCCGGGCGACGCCGACGGCATGGTGTGGGGCGCGGTGCACACCACCGCCTCCACCGT  
GCGCCCCGCGCTGCAGGTGCGCCGTGCTCTCTGGGACTTCGCCCTGCTTGGCCTCCACCCTTGG  
AGGGCCGCGCTGTTGGCATGTTGGCGGATTTGTGGCTGTGCCCTGTTGCTGCACGTTTACTCTCT  
CCATCGGCTTTGCGTGGCGCACGCGTTCTCAAACAGGGCATAGAACAATGCACACACGCTCTC  
ATGCACACTACCGCAGGTGCTCAAGAGCCCCGACACCCCGCTGGTGTCTCGGTCTTTCATCATGTG  
CCTGCCCGACCGAGTGGTGGTGTACGGCGACTGCGCCGTCAACGTCAACCCCTCCGCCGCCGACC  
TGCGCGAGGTGCGTCCGCAGCCGCGACGACCGGTGTTGCCCTGCACATTAACGAACGGGCGCC



CTGCGCTGCACGCACGGACTTGAGGAAAGCAAGTACCGTTTGGTCACTCCGTTGCTCTACAATATTC  
 TCACAGTTTTTGGGCTGAGCCCCCAGCGAAGCGTTCCAGGGGGGGGGCGAAGCCCCCAGGAA  
 CACCCTGTCCGTGCGTGCGTGGTGTGCGCAAACATAGCATACTGGCACAAACCGCGACTG  
 CTACGTACTAGTATTTGTTAATGCCTATTGCATGTAAATAGGTGGCAGGGAAAATTCGGGCGGAGCG  
 AGAAGTGCCTTCGCGCGTCCATGGAAATTGACTTTCGCGAGGTGCGGAGGAAAGCATCCGGTGCT  
 GCCGATATGCAGTCTATAAGGCAAACCTATGTTGGCGGCAAGCAAAGCGGGGAAGTATATCGAAAAGT  
 CTTTGAGCGACTTGCGCTGCCATGCCGACGCGCCAGAATGCCGAGAAGCCCCGAGGTGCC  
 CCCGCCCGCGCCTAGCCCTTTGAGCGTGGGGCGCCGGGGAGGTGTTGAGTATGGCAGGAGGCG  
 AAAGAAATGCTTGGGGTGTGGGAACGTGACAAGGCACGCATGTGGCGCGGCCCAACCCGAGT  
 GTCCCTAGCCGATGCGCCTGCGCGTGTAGCGGCATGGAGGCTCTGACGGGGCGTTACACGCCTA  
 TTAGCTCCCAAGCGTACGGGGGCTCAGCCATTTTCCAGCTGTACAAAGCTGACACCCCTTGTGG  
 GCTGAGCCCCCAGCGAAGCGTTCAGGGGGGGGGGGCGAAGCCCCCAGGAACACCCCTGTC  
 CGTGCGTTTGAAGAAAAGCGTGCAGGGCCAGGGGAGGGGGGAGGCGGACCAGGGGAGGTGACGG  
 GCAAAGGGTTCAGGGCAGGCAGACGTGACAAACGATAGCAAATGTGAATGAAAAGCAAAGAA  
 TATGTAGCGGCGCAAACCGCGCAAGCGATCGTCGGCAAACATAGCATACTGGCACAAACCTGCG  
 ACTGCTACGTATTAGTATTTGTTAATGCCTATTGCATGTAAATAGGTGGCAGGGAAAATTCGGGCGGA  
 GCGAGAAGTGCCTTCGCGTGTCCATGGAAATTGACTTTCGCGAGGTGCGGAGGAAAGCATCCGGTG  
 CCCGCCGATATGTAGTCTATAAGGCAAACCTATGTTGGCGGCAAGCAAAGCGGGGAAGTATATCGAAA  
 GTCTTTGAGCGACTTGCGCTGCCATGCCGACGCGCCAGAATGCCGAGAAGCCCCGAGGTGCG  
 CCCCCGCCCGCGCCTAGCCCTTTGAGCGTGGGGCGCCGGGGAGGTGTTGAGTATGGCAGGAGG  
 CGAAAGAAATGCTTGGGGTGTGGGAACGTGACAAGGCACGCATGTGGCGCGGGAAATCCCGCA  
 CGGCCCAACCCGAGTGTCCCTAGCCGACGCGCAGGCGCATCGTAGCGGCATGGAGGCTCTGACG  
 GGGCGTTACATGCTTATTAGCTCCAAGCGTACGGGGGCTCAGCCATTTTCCAGCTGTACAAAGCT  
 GACACCCCTTGTCTTGCCTGGTTGTGGCCGTGCCCGCCTGCTGTTGCGCAG**ATCGCCATCACCTC**  
**CAACGACACCGCCGCGGCCTTCGGCATCGAGCCGCGCTGGCCATGCTGTCTACTCCACGCTGG**  
**GCTCCGGCTCCGGCCCCGAC**GTGAGTTGGCTTGACGGGGACTGGGGCTTCGGAGTTTGGGAGGC  
 GTGGGGAAAGTCGCGGTGATAGTGGCGCAGGGAGCCTGAGCGGGGTGGGCGTGGATTGGCTAAG  
 ATTGGCATGACCTGTGCGGCCATTGAAACAAGGCTCCTTCGCGCTTTTATCTTACCGCCCACAG**GT**  
**CCAGAAGGTGAGCGAGGCTGTGGCCATCGTGAAGCAGCGGCGGCCGACATCAAGGTGGAGGGA**  
**CCATCCAGTACGACGCTGCCATTGACCCCAAG**GTGCGTTGCGCGCGCATTTATTTTCGGGGTTTAC  
 TATCTTGTGAAGGGCTTGCCTGGCTTGCATGATACCGGTATGGAATGAAGCGCGTGGATGAGGCGG  
 CGGTAAGTTTGGCACTCTGCCGGCGAACGAGCACACGCACATTGGTACTGGCTTGGTGTGTCCAC  
 TATGCAAGTTCCTCTCCCTAATGTTGGTGTGGCACGCGTGCCTGTGCAG**GTGGCGCGGTCAAG**  
**GTGCAGGGCCTAAGCGAGGTGGCGGGCAAGGCCACCGTGTTCATCTTCCCCGACCTCAACACCGG**  
 TCGTGGCGGCCAAAGGGAGGCCACTGAAAGGGGGCTGGCGGCCGCTGCCTGTGTATGGTTATC  
 TGCTTGCCTGGGCTACACAAACGGCAATGTCACTGTGCAATGCCGTTGCGCTTTCGCCCGGTC  
 GTTCTGGCATCCCCTAACCATCATGCCGCTGCCTCGTCCGCTCCTTACATGTCATGATATACGCA  
**GGCAACAACACGTACAAAGCGGTGCAGCAGTCCACGGTGGCCATCGCCATGGCCCCGTGATGCA**  
**GGTGGCGGTGTTCCCTCGAGTGCCGTTGGGATTCTGCTTTTACCTGTTGAACCAACTGGGCTC**  
 GGGTATGTGGGAACAGCCAGGTGATGTTGGCATCACCGTGCAGTGTGGGCTGGCCGAGCAG  
 ATCAGTGTGCTGCCAGACCCACATTAGACATCCGGCTGCTGACGCACTTCTTTCTTCCATCCGC  
 CCTCGCCGCGCAG**GGTCTACTCAGGCCGTGAACGACCTGTCCCGCGGCTGCACGGTGCCCGAC**  
**ATCATCAACACCATCTGCGTACCTCCATCCAGGCCTCCCGCATGTCATCCGCGCTCGCGCCGCG**  
**GCTGCCAAGGCTGCCGTGCGGGCGTTTAA**GGCAGCAGCAGCAGCAGCCGCGGGCAGCAGCCGGG  
 GGCAGCTAGTTGGGTGGGCATTGACAGACAAAGCGGCCGGAACAGGGATATATGCGCGCAGCCCC  
 GTTTCGCTGGCTGAGCAAGCCAGGAGGCAGGGTACAGGTTGTGCCGGCGAAACGAGCGCAGGCA  
 AGAGGCGGCCGGGCGTGAACGCTGGCTGGTGTGGGCTGATGGGGCTGATCATGGAGCAGTGC  
 CGCTTGCATCTTCGGGGAGCAGTGCCGCTTGCCCAATGACAGGGCGCTCTTGGTTGTGAGGGCG  
 GCGCTTGCCTGCGCGGTGACCGGGCGGTGCTGAGGGGACGACGTGGTAATAGCACATGGCAAT  
 TCATAGGTGAGTGTCTTCAATAACAGTTTTGTTTTGCTTAGTGTGCTGCTTGGTTATATGTTTTGT  
 GCTGGCGCGCAGGGCACTAAGGCTGAGCTGGTGGCCTAGGTGGTGTGAGTCTGGTGTATGCCGGG  
 TGTCGTGAGATGAGAAGGGCGGTGGCGGTGGACAACAGCAGGTAGAATACCGTACAGCCGCCATG  
 ATGCAGATATCACGAAGATAATAAGGAACTTTGGCCCCGCCACGTCCGGCTTGGTGTATGTGTTG  
 CATTATTTTTGGTGTGCAAGGTTGCCCGAAAAGCAAAGCCATGGCTTTCGCGCAGTATGACTTCTGTAC  
 GTCGTAATGTGCTACAAAGACACAGCAGACGGCGAGCCGTATAAAGAGCCTGTCACCGTTGTCC  
 ATTTCTGTAGCGGCTCGCTCTCACGCCTTTTCTTCTGGTCCGAGCGCAGACCTGCTACAACCTGCC

GGTGT CAGGAGATGGCCATCAAGCGGCTTGGGGGGCTGAAGGAGGGGCAGCGGCCCTGGTCAGT  
CAAAGTCTGCAACGACTGCTTGACGACCTGGGTGAGGACCGTGCATGTGCGGGGACGGCTGGGCA  
CTGGGGACGGATTGATTGACAGGTTGACGGTTGAAACAGCTCATGTGCGCTCTCTTCTTCTCCCGG  
TTCCCATCCCCAGAACC GCGACGTCTCCGCCGCCAACGTGATCCGTGTGCTCCTCCTGCTGAAGC  
TGATGGGCTTCGAGCGGCCGACCAAGCTGCAGCGGCCACCATGGCCGCCGGCGGTGGCGGGGCC  
GGGCTGAGAGCCTGAACGGCGCTAGCAGGGCGTGGGGCTGAGGGTGCACGTGCCGATTGGCGGC  
GAGTGACGTGACTAGTTTGTAGCTGCGGGTTAGCACGGACTGTGCACCCACCCAACCGGCCACG  
TCCGGATTTGCGGGGATGCCAAAGGCCCCCAACATAGAGGCGTGTGCTTAGTAGGCGCCCGCGTC  
AAGGTGGCGGGGTTAATAACGACCCGGGATCAGCCCTTTTCTGCCATAAGGCAGCCACCTCCTTG  
TTTGGTGTGCAAAAGAATGAATGCAATAAATGCCAATTATTGCATGCGGGTCGCCGACACCATGAT  
GGTCAGGGATGGCCGACACCGTACGTGGTTCATGTGAAGTGACATTACAAC TTGAGATGGCCCTTAC  
GTGGCTCTTCCACTGATGAGTGCTATGTAGTGGGCATGACTGGGATATGAACTGTCTACCAGCGTGT  
CGAATCCGATAGAAAGAGACGAGCGTGCAGGATTGCATCGGAGCGCCCTGCATTGGTGCTTGCAC  
GAGGCATCAGGGCTGGGGGGAGCGAGCTGCCTTGAGGGAAGGGCGTGGATGTTGTTGGGAAAGG  
CATCACCGGGTAAATTGTGTCCGTGTAACAATTGAAACGG

### **pat2-2 CDS SEQUENCE**

ATGTCTCTGAACAGTAGCACTATGTCGCGCCGGCAGGCGGTGGCCGGGGCCCCGGCAGTGGCGCC  
GTTCCGACACGCCGGGCTGTTCCCGCGCGTCAGGCTCTGCGCGAACCGCCGGGTGGCGCGTGTG  
GCGCCGAAGGCAGCGGGCAACGGCAATATCGCACAGGGCGAGCAGGGCTTTGACACCCTCTTCT  
CTCGGACATCTCCCTAGTGGGCCAGCGCACGCCTCTGCTGCTGGGCTTCTTCAACTACTTCGAGCG  
CCACCTCCCGCATGTGGGCTTCTTTGAGCCATTGCCGCCGAGGCGCTAGCGTCGTCCGAGCTGC  
GTATTGACCGCCACGTTGAGCTAGTGTACAAGGTGTTTAACTCAAGGGCGACGTGCGCGCCATGA  
CGGGCGTGCAGGACGCCGAGGCCGCGCGGATGATCGCAACGGCCAGCACAGCGAGCTGCTGGA  
CAAGATCTACAGCCAGTACGCCTCGTACAAGGAGGGGCAGGACCTGGTGTGTTGGAGGGGCCAG  
GCCCCGCTCATGGGCGGCACGGAGCTGGACGCGCAGATCGCCGCCGCCCTGAACGCGCCCCGTGCT  
CATGACTATGACCGGCCAGCCCAACGCGACCGTTGCCGACTACTACAACCGTGCATGGTGAAGCG  
GCAGGTGTTCTTGACCACCACGTGGAGGTGCTGGGCCTGGTTCATGAACGGGCTGCCGCGCCAGT  
CTCACGCCATCCTGTCCGGCCAGCTCCGGGACAAGTTCGCGGCGGCGGGGCTGCCCTTCGCCGGC  
GCCATCCCCACCGACATCATGCTGCGCAACGTCCGCCTGGACGAGGTCCAGACCGCCATGGGTGC  
CCAGCGGTGTACGGCGGACAGCCTGCTGACGGACGTGGAGTTGACGACGTGGTGGTGGCCAGCC  
AGCGCTGGAGGACTGAGATCCTGGCGGAGAGGCCCATGGGCAGGCCACTGTTGGTGCACC  
TCCGCGGACCCCTGGACATCGTGTGCTGGGGCTGCTGGCGGCACAGCTGTCCGTGTCCGGCCCCG  
GCGTGGCCGGCATCCTGCTGACGAGGCCGGCTCCGCCCGCTCCGGCCGCAACTACGCGCGTGA  
CACCATCGACCGCATCTTCGCCGGCCTGTCAAGCAGCGGCCTGTACAAGGGCAGCCTGCTGCCGG  
TGCTGGTGCAGGACATGCCGCTGCGTGACGCCATCAGAAAGCTGGACAACCTGGACGCCGCCATC  
CTGCCCTCATCCACGCGCAAGATCTCGCAGTGCAAGCGCCTGTTGAGCAGTACGTGGACGCCAAC  
GCGGTGGTGGCGCGGCTTCAGAACATGGTGCGCCCAACCGCATGACGCCCAAGATGTTTCATGCA  
CACGCTCAAGTCCATGTGCAACGCCACGCCCCAGCACATTGTGCTGCCCGAGTCGGAGGACAAGC  
GCGTGTGGCGGCGGCGGCGGACGTGGTGCAGCGCGGCCTGGCCAAGATCACGCTGCTGGGAGA  
CCCCACCACCTCCTGGCCGAGGCGGCCAAGCTGGGCCTGGACCTGTCCGGCTGCAACATCCACA  
ACCCAAACACCTCGGACCGGTTTGACAAGTACGTGGACATGCTGGTGGAGGCGAGGAAGAAGAAG  
GGCATGACGCGCGAGGTGGCGGCCGACACGCTGCACGGCGACGTGAACTTCTTTGCCACCATGAT  
GATCGTCCGCGGCGACGCCGACGGCATGGTGTCCGGCGCGGTGCACACCACCGCCTCCACCGTG  
CGCCCCGCGCTGCAGGTGCTCAAGAGCCCCGACACCCCGCTGGTGTCTCCTCGGTCTTCATCATGTG  
CTGCCCGACCGAGTGGTGGTGTACGGCGACTGCGCCGTCAACGTCAACCCCTCCGCCGCCGACCT  
GGCGCAGATCGCCATCACCTCCAACGACACCGCCCGCGGCCTTCGGCATCGAGCCGCGCGTGGCCA  
TGCTGTCTACTCCACGCTGGGCTCCGGCTCCGGCCCCGACGTCCAGAAGGTGAGCGAGGCTGTG  
GCCATCGTGAAGCAGCGGCCGGCCGACATCAAGGTGGAGGGACCCATCCAGTACGACGCTGCCAT  
TGACCCCAAGGTGGCGGCGGTCAAGGTGCAGGGCCTAAGCGAGGTGGCGGGCAAGGCCACCGTG  
TTCATCTTCCCCGACCTCAACACCGGCAACAACACGTACAAAGCGGTGCAGCAGTCCACGGGTGCC  
ATCGCCATGGGCCCGTCATGCAGGGTCTACTCAGGCCCGTGAACGACCTGTCCCGCGGCTGCAC  
GGTGGCCGACATCATCAACACCATCTGCGTACCTCCATCCAGGCCTCCCGCATGTCATCCGCCCG  
TCGCGCCGCGGCTGCCAAGGCTGCCGTCCGGCGCCGTTAA

**Supplemental Figure 6. Alignments of WT and Truncated ACK and PAT Proteins.**

(A). Alignment of amino acid sequences of WT ACK1 and the truncated protein of the *ack1* mutant. (B). Alignment of amino acid sequences of WT ACK2 and the truncated protein of the *ack2* mutant. (C). Alignment of amino acid sequences of WT PAT2 and the truncated protein of the *pat2-1* mutant. Identical or highly conserved amino acids in all positions are given in red letters (high consensus region), a low consensus amino acid position is given in blue letters, while black letters indicate an overall lack of strong consensus. Alignments were performed using <http://multalin.toulouse.inra.fr/multalin/>.

(A). Alignment of amino acid sequences of WT ACK1 and the truncated protein of the *ack1* mutant.

|           |                                                            |     |     |     |     |     |     |
|-----------|------------------------------------------------------------|-----|-----|-----|-----|-----|-----|
|           | 1                                                          | 10  | 20  | 30  | 40  | 50  | 60  |
|           | -----+-----+-----+-----+-----+-----+-----+-----            |     |     |     |     |     |     |
| ACK1      | MLAGKYPVGSAYPPRNTAPSGKGSKYL VYNAGSSSIKFKIFTAETLLPGAAGLFDRI |     |     |     |     |     |     |
| ack1      | MLAGKYPVGSAYPPRNTAPSGKGSKYL VYNAGSSSIKFKIFTAETLLPGAAGLFDRI |     |     |     |     |     |     |
| Consensus | MLAGKYPVGSAYPPRNTAPSGKGSKYL VYNAGSSSIKFKIFTAETLLPGAAGLFDRI |     |     |     |     |     |     |
|           | 61                                                         | 70  | 80  | 90  | 100 | 110 | 120 |
|           | -----+-----+-----+-----+-----+-----+-----+-----            |     |     |     |     |     |     |
| ACK1      | ANCYLKASVPDDGGKPKKFEKKIPAKDHLTAMQDIMSFI                    |     |     |     |     |     |     |
| ack1      | ANCYLKASVPDDGGKPKKFEKKIPIVTRALVNTSPPRSPSHGRPRSPFALS        |     |     |     |     |     |     |
| Consensus | ANCYLKASVPDDGGKPKKFEKKIPakdralar#dimpridengrprfafalc.....  |     |     |     |     |     |     |
|           | 121                                                        | 130 | 140 | 150 | 160 | 170 | 180 |
|           | -----+-----+-----+-----+-----+-----+-----+-----            |     |     |     |     |     |     |
| ACK1      | GLDMSQPKLLTPDYIRCIQDASHFAPLHNPPHLQGIYASQKVF                |     |     |     |     |     |     |
| ack1      | GLDMSQPKLLTPDYIRCIQDASHFAPLHNPPHLQGIYASQKVF                |     |     |     |     |     |     |
| Consensus | .....                                                      |     |     |     |     |     |     |
|           | 181                                                        | 190 | 200 | 210 | 220 | 230 | 240 |
|           | -----+-----+-----+-----+-----+-----+-----+-----            |     |     |     |     |     |     |
| ACK1      | MPPESSYYVGLPYDMEYKHKIRRYGFHGTSHKYLVDQAAAMLGK               |     |     |     |     |     |     |
| ack1      | MPPESSYYVGLPYDMEYKHKIRRYGFHGTSHKYLVDQAAAMLGK               |     |     |     |     |     |     |
| Consensus | .....                                                      |     |     |     |     |     |     |
|           | 241                                                        | 250 | 260 | 270 | 280 | 290 | 300 |
|           | -----+-----+-----+-----+-----+-----+-----+-----            |     |     |     |     |     |     |
| ACK1      | VAAYRGGQCVDTSMGHTPLEGLLMGTRCGDIDPAVYLHIQNLGL               |     |     |     |     |     |     |
| ack1      | VAAYRGGQCVDTSMGHTPLEGLLMGTRCGDIDPAVYLHIQNLGL               |     |     |     |     |     |     |
| Consensus | .....                                                      |     |     |     |     |     |     |
|           | 301                                                        | 310 | 320 | 330 | 340 | 350 | 360 |
|           | -----+-----+-----+-----+-----+-----+-----+-----            |     |     |     |     |     |     |
| ACK1      | LGLTGSNDLRTVIEGAGKGEPRSQLGLDMFYRRYRKYIGAYNAHLDGQY          |     |     |     |     |     |     |
| ack1      | LGLTGSNDLRTVIEGAGKGEPRSQLGLDMFYRRYRKYIGAYNAHLDGQY          |     |     |     |     |     |     |
| Consensus | .....                                                      |     |     |     |     |     |     |
|           | 361                                                        | 370 | 380 | 390 | 400 | 410 | 420 |
|           | -----+-----+-----+-----+-----+-----+-----+-----            |     |     |     |     |     |     |
| ACK1      | NSALYRGLICDRMQALGIAYDKDANAAAYGGKQADISGPGARIRALVIPTDEEL     |     |     |     |     |     |     |
| ack1      | NSALYRGLICDRMQALGIAYDKDANAAAYGGKQADISGPGARIRALVIPTDEEL     |     |     |     |     |     |     |
| Consensus | .....                                                      |     |     |     |     |     |     |
|           | 421                                                        | 431 |     |     |     |     |     |
|           | -----+-----                                                |     |     |     |     |     |     |
| ACK1      | LQVYRGAALAA                                                |     |     |     |     |     |     |
| ack1      | LQVYRGAALAA                                                |     |     |     |     |     |     |
| Consensus | .....                                                      |     |     |     |     |     |     |

**(B).** Alignment of amino acid sequences of WT ACK2 and the truncated ACK2 protein of the *ack2* mutant.

|             |                                                                |     |     |     |     |     |     |
|-------------|----------------------------------------------------------------|-----|-----|-----|-----|-----|-----|
|             | 1                                                              | 10  | 20  | 30  | 40  | 50  | 60  |
|             | -----+-----+-----+-----+-----+-----+-----                      |     |     |     |     |     |     |
| ACK2        | MQRVLYLNAGSSSLKFKLFTAAGTSLGEAGLGGQFDRIGDVANCTLKASQPGAAPGMKPR   |     |     |     |     |     |     |
| <i>ack2</i> | MQRVLYLNAGSSSLKFKLFTAAGTSLGEAGLGGQFDRIGDVANCTLKASQPGAAPGMKPR   |     |     |     |     |     |     |
| Consensus   | MQRVLYLNAGSSSLKFKLFTAAGTSLGEAGLGGQFDRIGDVANCTLKASQPGAAPGMKPR   |     |     |     |     |     |     |
|             | 61                                                             | 70  | 80  | 90  | 100 | 110 | 120 |
|             | -----+-----+-----+-----+-----+-----+-----                      |     |     |     |     |     |     |
| ACK2        | KMELKVPAQDHVGAMKGILDFIKENVSATFASEVVAVGHRIVHGLDLSQPVLLTPSSTAT   |     |     |     |     |     |     |
| <i>ack2</i> | KMELKVPAQDHVGAMKGILDFIKENVSATFASEVVAVGHRIVHGLDLSQPVLLTPSSTAT   |     |     |     |     |     |     |
| Consensus   | KMELKVPAQDHVGAMKGILDFIKENVSATFASEVVAVGHRIVHGLDLSQPVLLTPSSTAT   |     |     |     |     |     |     |
|             | 121                                                            | 130 | 140 | 150 | 160 | 170 | 180 |
|             | -----+-----+-----+-----+-----+-----+-----                      |     |     |     |     |     |     |
| ACK2        | IKQAAYLAPLHNPPGLQGI EAATEVFSGYPQVAVFDATAFHQTMPPHAYMYGLPYELYEKH |     |     |     |     |     |     |
| <i>ack2</i> | IKQAAYLAPLHNPPGLQGI EAATEVFSGYPQVAVFDATAFHQTMPPHAYMYGLPYELYEKH |     |     |     |     |     |     |
| Consensus   | IKQAAYLAPLHNPPGLQGI EAATEVFSGYPQVAVFDATAFHQTMPPHAYMYGLPYELYEKH |     |     |     |     |     |     |
|             | 181                                                            | 190 | 200 | 210 | 220 | 230 | 240 |
|             | -----+-----+-----+-----+-----+-----+-----                      |     |     |     |     |     |     |
| ACK2        | KIRRYGFHGTSHKYLVEQAAMLGKPYSDTNVITCHLNGSSVAAYRGGQCYDTSMGLTP     |     |     |     |     |     |     |
| <i>ack2</i> | KIRRYGFHGTSHKYLVEQAAMLGKPYSDTNVITCHLNGSSVAAYRGGQCYDTSMGLTP     |     |     |     |     |     |     |
| Consensus   | KIRRYGFHGTSHKYLVEQAAMLGKPYSDTNVITCHLNGSSVAAYRGGQCYDTSMGLTP     |     |     |     |     |     |     |
|             | 241                                                            | 250 | 260 | 270 | 280 | 290 | 300 |
|             | -----+-----+-----+-----+-----+-----+-----                      |     |     |     |     |     |     |
| ACK2        | LEGLLMGTRCGMDPAVYLHIQNCGLNVKETDTLLNKKSGLLGLTGSNDLRAVIEGAGK     |     |     |     |     |     |     |
| <i>ack2</i> | LEGLLMGTRCGMDPAVYLHIQNCGLNVKETDTLLNKKSGLLGLTGSNDLRAVIEGAGK     |     |     |     |     |     |     |
| Consensus   | LEGLLMGTRCGMDPAVYLHIQNCGLNVKETDTLLNKKSGLLGLTGSNDLRAVIEGAGK     |     |     |     |     |     |     |
|             | 301                                                            | 310 | 320 | 330 | 340 | 350 | 360 |
|             | -----+-----+-----+-----+-----+-----+-----                      |     |     |     |     |     |     |
| ACK2        | GELRSQLGLDMFTYRKYIGAYTAALDGKYDAVYVFSAGIGENSPFIRKLI AEPLHARGN   |     |     |     |     |     |     |
| <i>ack2</i> | GELRSQLGLDMFTYRKYIGAYTAALDGKYDAVYVFSAGIGENSPFIRKLI AEPLHARKV   |     |     |     |     |     |     |
| Consensus   | GELRSQLGLDMFTYRKYIGAYTAALDGKYDAVYVFSAGIGENSPFIRKLI AEPLHARGN   |     |     |     |     |     |     |
|             | 361                                                            | 370 | 380 | 390 | 400 | 410 | 414 |
|             | -----+-----+-----+-----+-----+-----+-----                      |     |     |     |     |     |     |
| ACK2        | QLDHAANDTAVGRAGVISTPGSRVQLLYIPTDEELSI AEQTLQVAKGALGAAAA        |     |     |     |     |     |     |
| <i>ack2</i> | AGSL                                                           |     |     |     |     |     |     |
| Consensus   | agdh.....                                                      |     |     |     |     |     |     |

(C). Alignment of amino acid sequences of WT PAT2 and truncated PAT2 protein of the *pat2-1* mutant.

|           |                                                             |     |     |     |     |     |     |     |     |  |
|-----------|-------------------------------------------------------------|-----|-----|-----|-----|-----|-----|-----|-----|--|
|           | 1                                                           | 10  | 20  | 30  | 40  | 50  | 60  | 70  | 80  |  |
| PAT2      | -----+-----+-----+-----+-----+-----+-----+-----+-----+----- |     |     |     |     |     |     |     |     |  |
| pat2-1    | -----+-----+-----+-----+-----+-----+-----+-----+-----+----- |     |     |     |     |     |     |     |     |  |
| Consensus | -----+-----+-----+-----+-----+-----+-----+-----+-----+----- |     |     |     |     |     |     |     |     |  |
|           | 81                                                          | 90  | 100 | 110 | 120 | 130 | 140 | 150 | 160 |  |
| PAT2      | -----+-----+-----+-----+-----+-----+-----+-----+-----+----- |     |     |     |     |     |     |     |     |  |
| pat2-1    | -----+-----+-----+-----+-----+-----+-----+-----+-----+----- |     |     |     |     |     |     |     |     |  |
| Consensus | -----+-----+-----+-----+-----+-----+-----+-----+-----+----- |     |     |     |     |     |     |     |     |  |
|           | 161                                                         | 170 | 180 | 190 | 200 | 210 | 220 | 230 | 240 |  |
| PAT2      | -----+-----+-----+-----+-----+-----+-----+-----+-----+----- |     |     |     |     |     |     |     |     |  |
| pat2-1    | -----+-----+-----+-----+-----+-----+-----+-----+-----+----- |     |     |     |     |     |     |     |     |  |
| Consensus | -----+-----+-----+-----+-----+-----+-----+-----+-----+----- |     |     |     |     |     |     |     |     |  |
|           | 241                                                         | 250 | 260 | 270 | 280 | 290 | 300 | 310 | 320 |  |
| PAT2      | -----+-----+-----+-----+-----+-----+-----+-----+-----+----- |     |     |     |     |     |     |     |     |  |
| pat2-1    | -----+-----+-----+-----+-----+-----+-----+-----+-----+----- |     |     |     |     |     |     |     |     |  |
| Consensus | -----+-----+-----+-----+-----+-----+-----+-----+-----+----- |     |     |     |     |     |     |     |     |  |
|           | 321                                                         | 330 | 340 | 350 | 360 | 370 | 380 | 390 | 400 |  |
| PAT2      | -----+-----+-----+-----+-----+-----+-----+-----+-----+----- |     |     |     |     |     |     |     |     |  |
| pat2-1    | -----+-----+-----+-----+-----+-----+-----+-----+-----+----- |     |     |     |     |     |     |     |     |  |
| Consensus | -----+-----+-----+-----+-----+-----+-----+-----+-----+----- |     |     |     |     |     |     |     |     |  |
|           | 401                                                         | 410 | 420 | 430 | 440 | 450 | 460 | 470 | 480 |  |
| PAT2      | -----+-----+-----+-----+-----+-----+-----+-----+-----+----- |     |     |     |     |     |     |     |     |  |
| pat2-1    | -----+-----+-----+-----+-----+-----+-----+-----+-----+----- |     |     |     |     |     |     |     |     |  |
| Consensus | -----+-----+-----+-----+-----+-----+-----+-----+-----+----- |     |     |     |     |     |     |     |     |  |
|           | 481                                                         | 490 | 500 | 510 | 520 | 530 | 540 | 550 | 560 |  |
| PAT2      | -----+-----+-----+-----+-----+-----+-----+-----+-----+----- |     |     |     |     |     |     |     |     |  |
| pat2-1    | -----+-----+-----+-----+-----+-----+-----+-----+-----+----- |     |     |     |     |     |     |     |     |  |
| Consensus | -----+-----+-----+-----+-----+-----+-----+-----+-----+----- |     |     |     |     |     |     |     |     |  |
|           | 561                                                         | 570 | 580 | 590 | 600 | 610 | 620 | 630 | 640 |  |
| PAT2      | -----+-----+-----+-----+-----+-----+-----+-----+-----+----- |     |     |     |     |     |     |     |     |  |
| pat2-1    | -----+-----+-----+-----+-----+-----+-----+-----+-----+----- |     |     |     |     |     |     |     |     |  |
| Consensus | -----+-----+-----+-----+-----+-----+-----+-----+-----+----- |     |     |     |     |     |     |     |     |  |
|           | 641                                                         | 650 | 660 | 670 | 680 | 690 | 700 | 710 | 720 |  |
| PAT2      | -----+-----+-----+-----+-----+-----+-----+-----+-----+----- |     |     |     |     |     |     |     |     |  |
| pat2-1    | -----+-----+-----+-----+-----+-----+-----+-----+-----+----- |     |     |     |     |     |     |     |     |  |
| Consensus | -----+-----+-----+-----+-----+-----+-----+-----+-----+----- |     |     |     |     |     |     |     |     |  |
|           | 721                                                         | 730 | 740 | 750 | 760 | 770 | 780 | 790 | 92  |  |
| PAT2      | -----+-----+-----+-----+-----+-----+-----+-----+-----+----- |     |     |     |     |     |     |     |     |  |
| pat2-1    | -----+-----+-----+-----+-----+-----+-----+-----+-----+----- |     |     |     |     |     |     |     |     |  |
| Consensus | -----+-----+-----+-----+-----+-----+-----+-----+-----+----- |     |     |     |     |     |     |     |     |  |

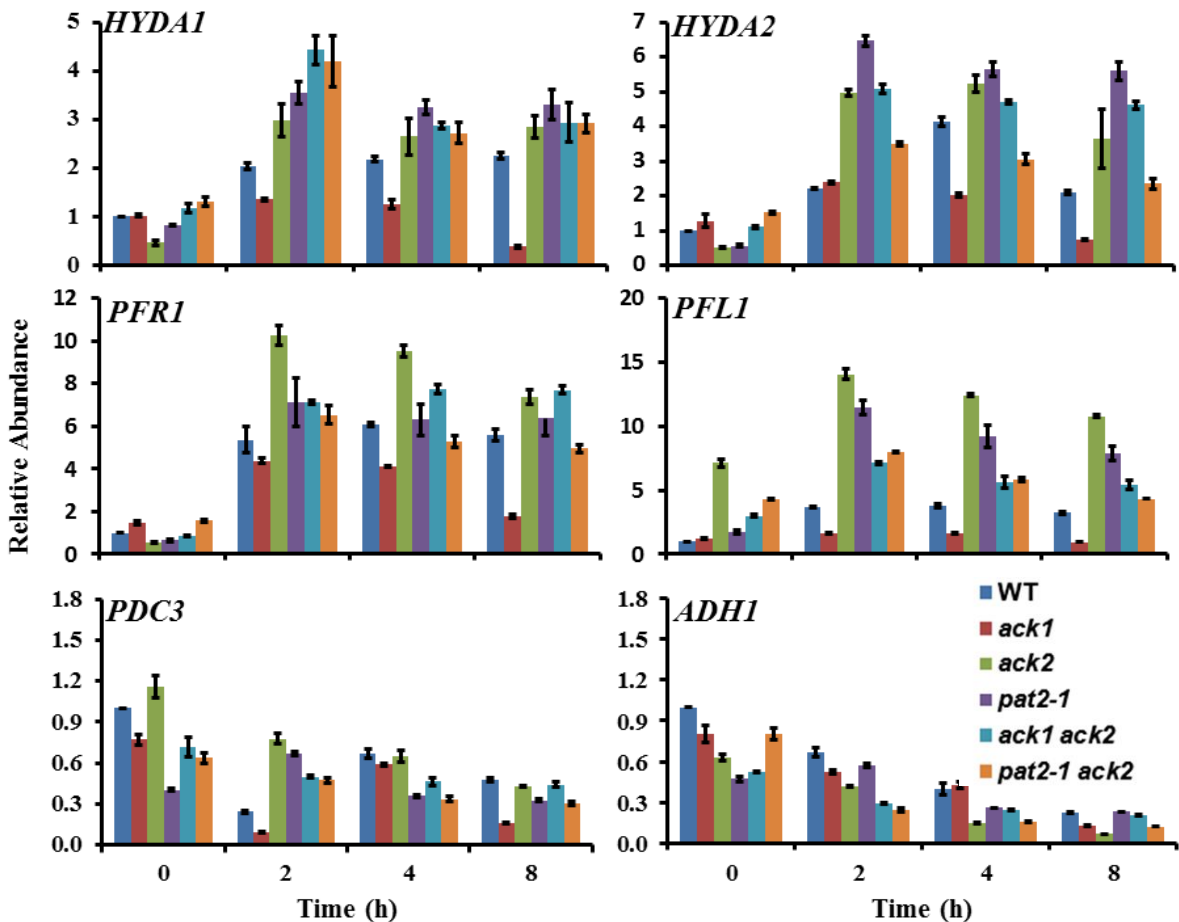

### Supplemental Figure 7. Changes in Abundance of Transcripts Encoding Fermentative Enzymes in *pat* and *ack* Mutants.

RT-qPCR was used to determine transcript levels from the indicated fermentative genes in WT and single and double mutant strains under dark anoxic conditions. There were no significant differences between the values based on *t*-tests. Errors bars represent SD.

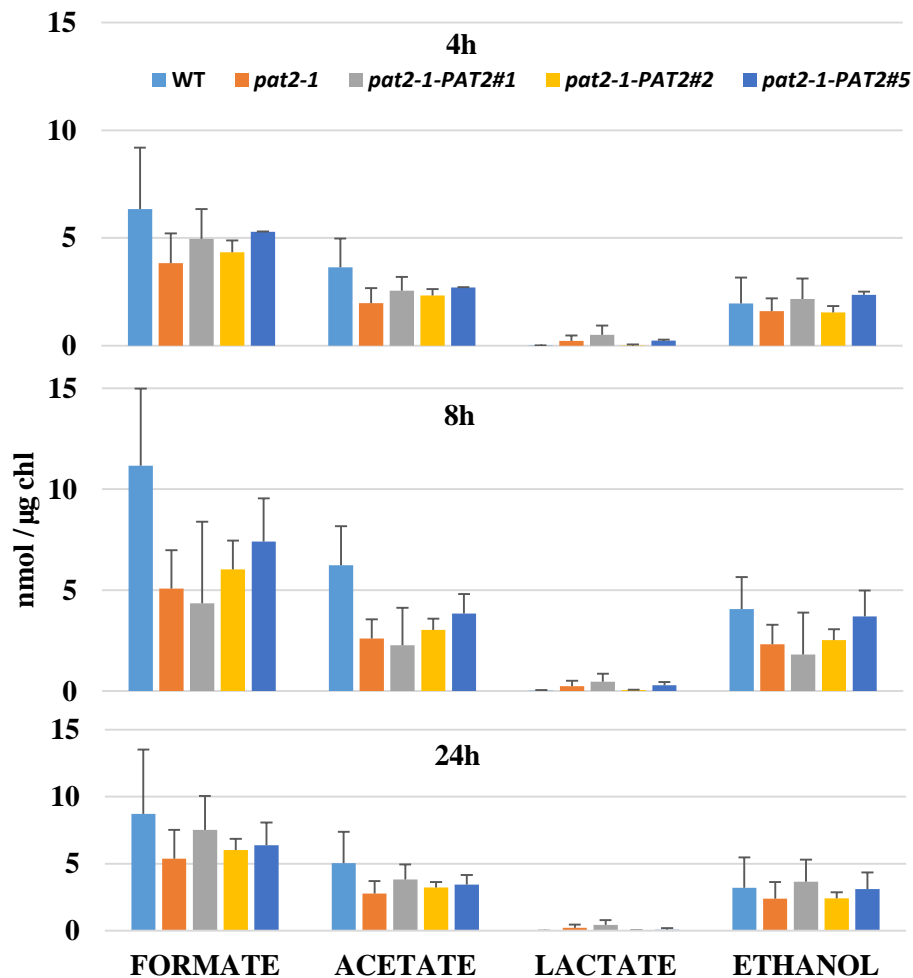

**Supplemental Figure 8. Accumulation of External Metabolites in the Complemented Strains of *pat2-1*.**

HPLC quantitation of extracellular metabolites secreted by the indicated mutants after 4, 8 or 24 h of dark anoxic acclimation. Errors bars represent SEM.

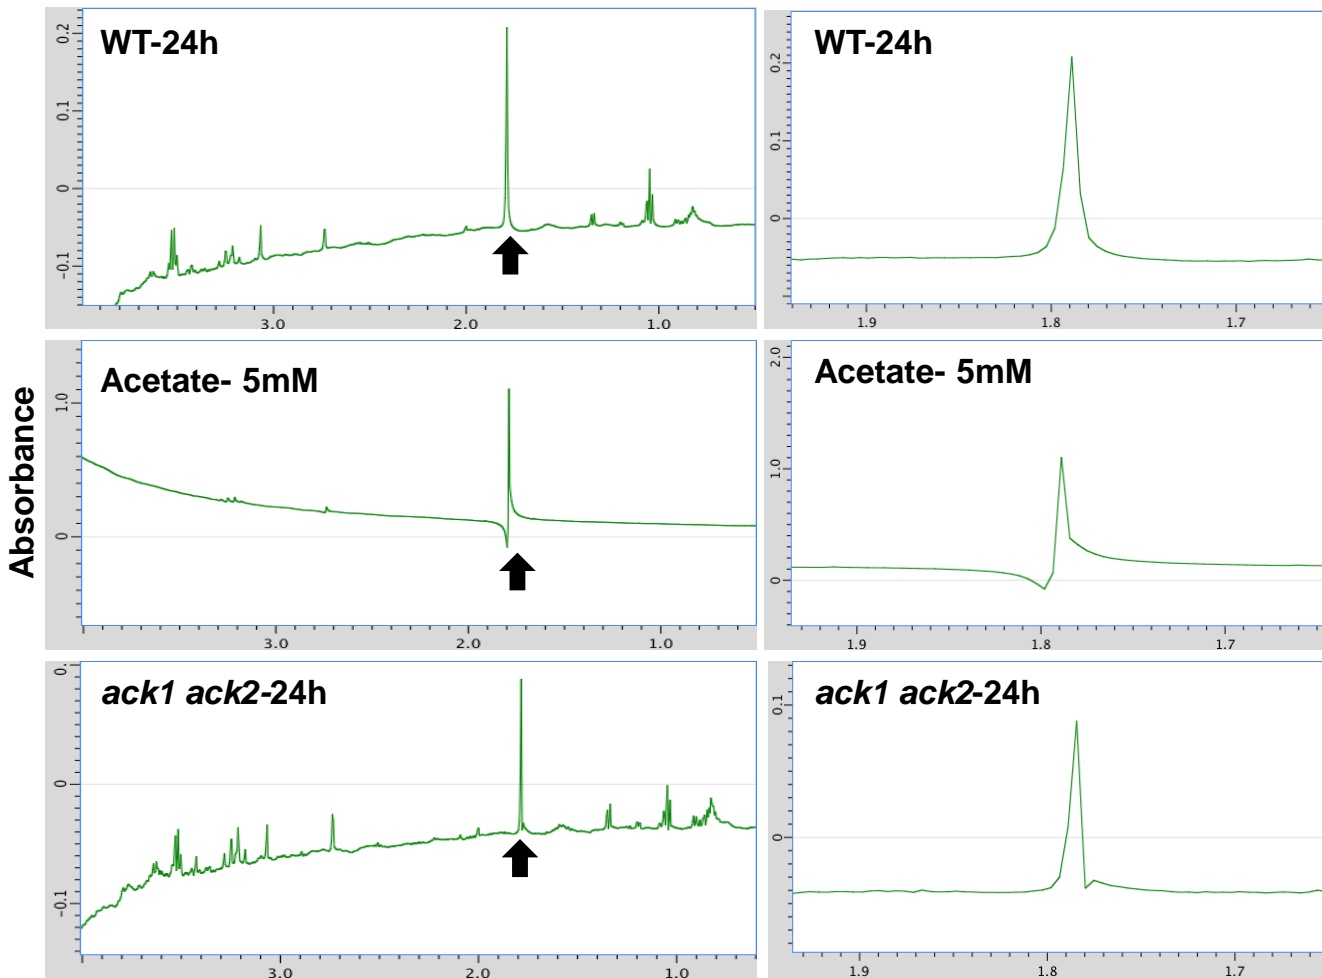

**Supplemental Figure 9. Nuclear Magnetic Resonance (NMR) to Confirm the Acetate Production in *ack1 ack2* Double Mutants.**

NMR confirmation of acetate secreted by the WT and *ack1 ack2* mutant strains after 24 h of dark anoxic acclimation. 5 mM acetate was applied as positive controls. Arrows represent the acetate absorbance peak. The right pics are the close-up pic of the acetate absorbance peaks.



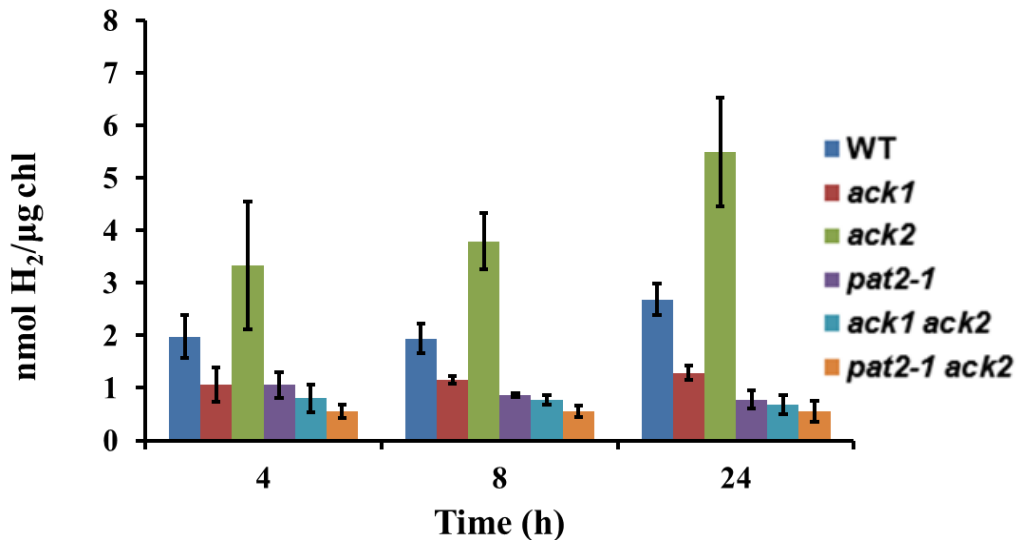

### Supplemental Figure 10. Fermentative H<sub>2</sub> Production by Various Mutants.

Fermentative H<sub>2</sub> production at the indicated times of dark anoxic acclimation determined using gas chromatography from cultures of the indicated mutants. There were no significant differences between the values based on *t*-tests. Errors bars represent SD.

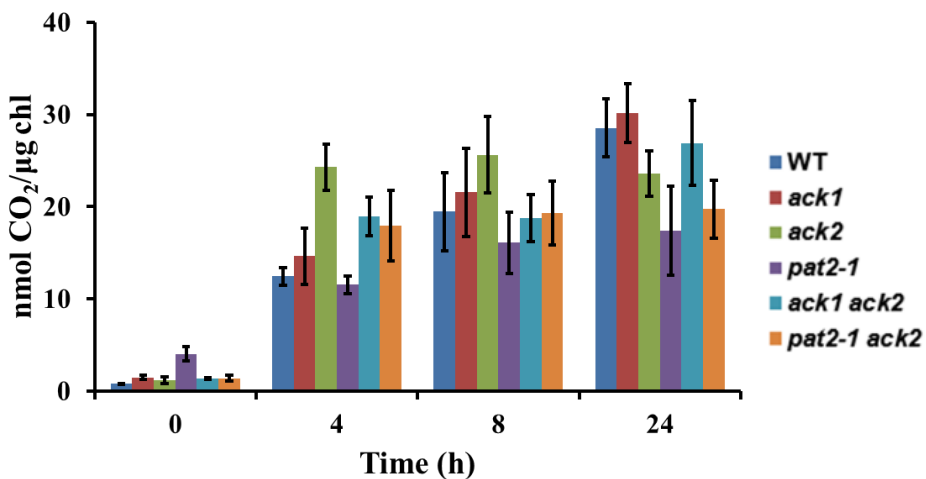

### Supplemental Figure 11. Fermentative CO<sub>2</sub> Production by Various Mutants.

Fermentative CO<sub>2</sub> production at indicated times of dark anoxic acclimation determined using gas chromatography from cultures of the indicated mutants. There were no significant differences between the values based on *t*-tests. Errors bars represent SD.

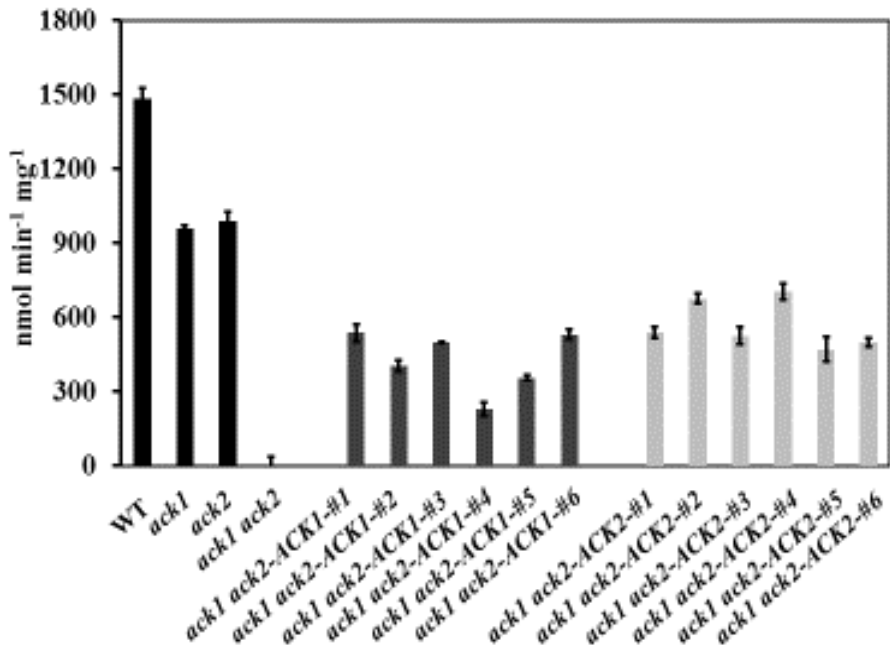

**Supplemental Figure 12. *In Vitro* Acetate Kinase Activity in Mutant and Complemented Strains.**

Acetate kinase activity was measured in the *ack1*, *ack2* and *ack1 ack2* mutants. The *ack1 ack2-ACK1-#1* to #6 lines are the *ack1 ack2* double mutants transformed with *ACK1*, while *ack1 ack2-ACK2-#1* to #6 are *ack1 ack2* double mutants transformed with *ACK2*. Error bars represent SD.

A

1 10 20 30 40 50 60 70 80 90 100 110 120 130  
 AC51-194063  
 AC52-391501  
 AC53-196311  
 AC54-511767  
 Consensus  
 MGLAARACCRARVPLSLEGRARVRLTQSVRYLGVATAVRVLVYIADVTVEEGYSGEHLGLAQLAARLAPASGAGRQPRGCLPRAAGSCGPPYPERAGSSALFRQALFKSKAPVYVHAFGRPPRFVSARGGATRA

131 140 150 160 170 180 190 200 210 220 230 240 250 260  
 DGGVYVALLSGSSTFSLGATRASLPVLRHARRARPARAGCSAREADLCLDARASGARTFARVPLGFLGGAGAGVYVSGSGGAARAGVYVPLGLLIARVAVSAGDEPARAGDGGGGGVEVARVRA

261 270 280 290 300 310 320 330 340 350 360 370 380 390  
 AC51-194063  
 AC52-391501  
 AC53-196311  
 AC54-511767  
 Consensus  
 GAARVADSSAKRSRHPITGGSVYVPPSPQLSPPPPVPVVSAPQARAPPPTPTATPVNHLSTQARLSASQDHSKSTSYVTSGSGRGRISLAAARREARQITLEPSSPSTRSLRALHLQTVQSRITAVN

391 400 410 420 430 440 450 460 470 480 490 500 510 520  
 DDFAREGDEALHNKGRHS-PLCGNINQENVPVHSVAREINNAHYLDLRIETAGDRDRVATVGGNDGEEVRLYSELXSKRYCRANV-KSLGKRVGRSDVYHNSLVLPELPAHPLACRIGRIGV

521 530 540 550 560 570 580 590 600 610 620 630 640 650  
 AC51-194063  
 AC52-391501  
 AC53-196311  
 AC54-511767  
 Consensus  
 IYVFGFARLSEARLISGSRVYVIT-THRPKPKTGLKATVNDLCTEKNHNTVYVNLVLEL-PLIAREVE-GSKHGRQVYVTAER-PPHARPELKYIYSGTQPKK-

651 660 670 680 690 700 710 720 730 740 750 760 770 780  
 SVVFGFARLSEARLISGSRVYVIT-THRPKPKTGLKATVNDLCTEKNHNTVYVNLVLEL-PLIAREVE-GSKHGRQVYVTAER-PPHARPELKYIYSGTQPKK-

781 790 800 810 820 830 840 850 860 870 880 890 900 910  
 AC51-194063  
 AC52-391501  
 AC53-196311  
 AC54-511767  
 Consensus  
 AHWYVVDGGRCPDTHAQITTEGHHITPLPGATPL-KPESRITLFFGVEVPLDEK-GNEL-GQPCGVLCKKPKPSRHRVTVGDRHARE-QTYFSAKYGYFVIGDGRDRDHYVHITGDDVYDLV

911 920 930 940 950 960 970 980 990 1000 1010 1020 1030 1040  
 AC51-194063  
 AC52-391501  
 AC53-196311  
 AC54-511767  
 Consensus  
 SGRHIGTEVESHLVEHPSGERRVYV-GVENPIKQSTYVYVITLVEGPDARAKELISYVYKTLGEPFAPPDVIHAPLKTARSKLHRRVLRKLRASGKEDL-GDTSILNDPSSVQVVLVEGK

1041 1050 1060 1070 1080 1090 1100 1110 1120 1130 1140 1150 1160 1170  
 AC51-194063  
 AC52-391501  
 AC53-196311  
 AC54-511767  
 Consensus  
 LGVDVGGARLVLYLQGLPPAPARALLTVYRDTGALDKLKSGLVHARLRASGRADMDLRAGVGVYVLSVSHVSRHGRGSSSTTASRALLSTTGMLNFRAPVYAGGSGGGGSLGRARSSAH

1171 1180 1190 1200 1210 1220 1230 1240 1250 1260 1270 1280 1290 1300  
 AC51-194063  
 AC52-391501  
 AC53-196311  
 AC54-511767  
 Consensus  
 HAPPPAPQALSPHGPGICGAGGSSGGGGGGGGVHGPELSSAPARDELLQLQARAAASASGGGGGGGSSCHSVSIVSNAVGAARVAVSAGAGRQLQPGGGVGGSSGGRLSALPSSSSAVYNTGATT

1301 1310 1320 1330 1340 1350 1360 1370 1380 1390 1400 1409  
 AC51-194063  
 AC52-391501  
 AC53-196311  
 AC54-511767  
 Consensus  
 GTGTATVAGRGGSTCGSSHGVGGGGGGGGGCGAEGPTATALLTVMDLEETYESGHRARQALVDSLITTTLAGNTSGRHALHGGPGPAGGGGGVDDGTANG

B

ALDH1-102889  
 ALDH2-130434  
 ALDH3-135619  
 ALDH8-412458  
 ALDH5-283125  
 ALDH6-390966  
 ALDH7-406746  
 ALDH4-150809  
 Consensus  
 MSLRAALGHARR-VAHEGSLVGV

1 10 20 30 40 50 60 70 80 90 100 110 120 130  
 HNLNGALAPHLNHSYCSAGIGASREQPPSAGCGATGATATATSPSSSGRPAPPTASVYPTSSVYPTASFLPTASVYPTASFLAGAAARGLVRAITRQLALAAITSAALPAPSPRGLPQPLPQSLGG

131 140 150 160 170 180 190 200 210 220 230 240 250 260  
 Consensus  
 MSLRAALGHARR-VAHEGSLVGV

261 270 280 290 300 310 320 330 340 350 360 370 380 390  
 ALDH1-102889  
 ALDH2-130434  
 ALDH3-135619  
 ALDH8-412458  
 ALDH5-283125  
 ALDH6-390966  
 ALDH7-406746  
 ALDH4-150809  
 Consensus  
 AKPSKL-IT-EVVRSDIITDYATEGRYVLEGGILLNSDFSPGNARMLCLVSPKGLVGLVITLPPFVYVNLAVSKLAPALHAGNAVILKPTT---GQAVAGIHWVQCFHARGLPQALSVATGRGE

391 400 410 420 430 440 450 460 470 480 490 500 510 520  
 ALDH1-102889  
 ALDH2-130434  
 ALDH3-135619  
 ALDH8-412458  
 ALDH5-283125  
 ALDH6-390966  
 ALDH7-406746  
 ALDH4-150809  
 Consensus  
 LGDFLITHPDVCISFVGGDTG---TSIARKAGRV---PLNELGKGVKIVCED---ADLDAANKIHKGGFVSGQRCTAVKLVVRA---PVADR

521 530 540 550 560 570 580 590 600 610 620 630 640 650  
 ALDH1-102889  
 ALDH2-130434  
 ALDH3-135619  
 ALDH8-412458  
 ALDH5-283125  
 ALDH6-390966  
 ALDH7-406746  
 ALDH4-150809  
 Consensus  
 LVAARVAGVAKLSVGR-EDDCDITPV-VSESSANFTEGLANDAKKAGATFVTEGAR---REG---NLITPVLIDHTVADLAEPEFGVPLVHRRVSSYVAEREH---CNKSKY

651 660 670 680 690 700 710 720 730 740 750 760 770 780  
 ALDH1-102889  
 ALDH2-130434  
 ALDH3-135619  
 ALDH8-412458  
 ALDH5-283125  
 ALDH6-390966  
 ALDH7-406746  
 ALDH4-150809  
 Consensus  
 GLQGVCFTRDINAIKISDAHEGTQVQVNSAPRAG-DHFFPQGRDGGTSGQGRINSANIKIKSTVNLDKESYTLG

781 790 800  
 ALDH1-102889  
 ALDH2-130434  
 ALDH3-135619  
 ALDH8-412458  
 ALDH5-283125  
 ALDH6-390966  
 ALDH7-406746  
 ALDH4-150809  
 Consensus  
 GHTFTLTPSAGHAGLNEQVNDVAGVGN-VPVPLPFFSFTGARGSLDGHVYRAGVYVYQITVYKHPKEDIRGTSNPATLSSSSGSKS---SGCKPRLPLGRDVRGS

C

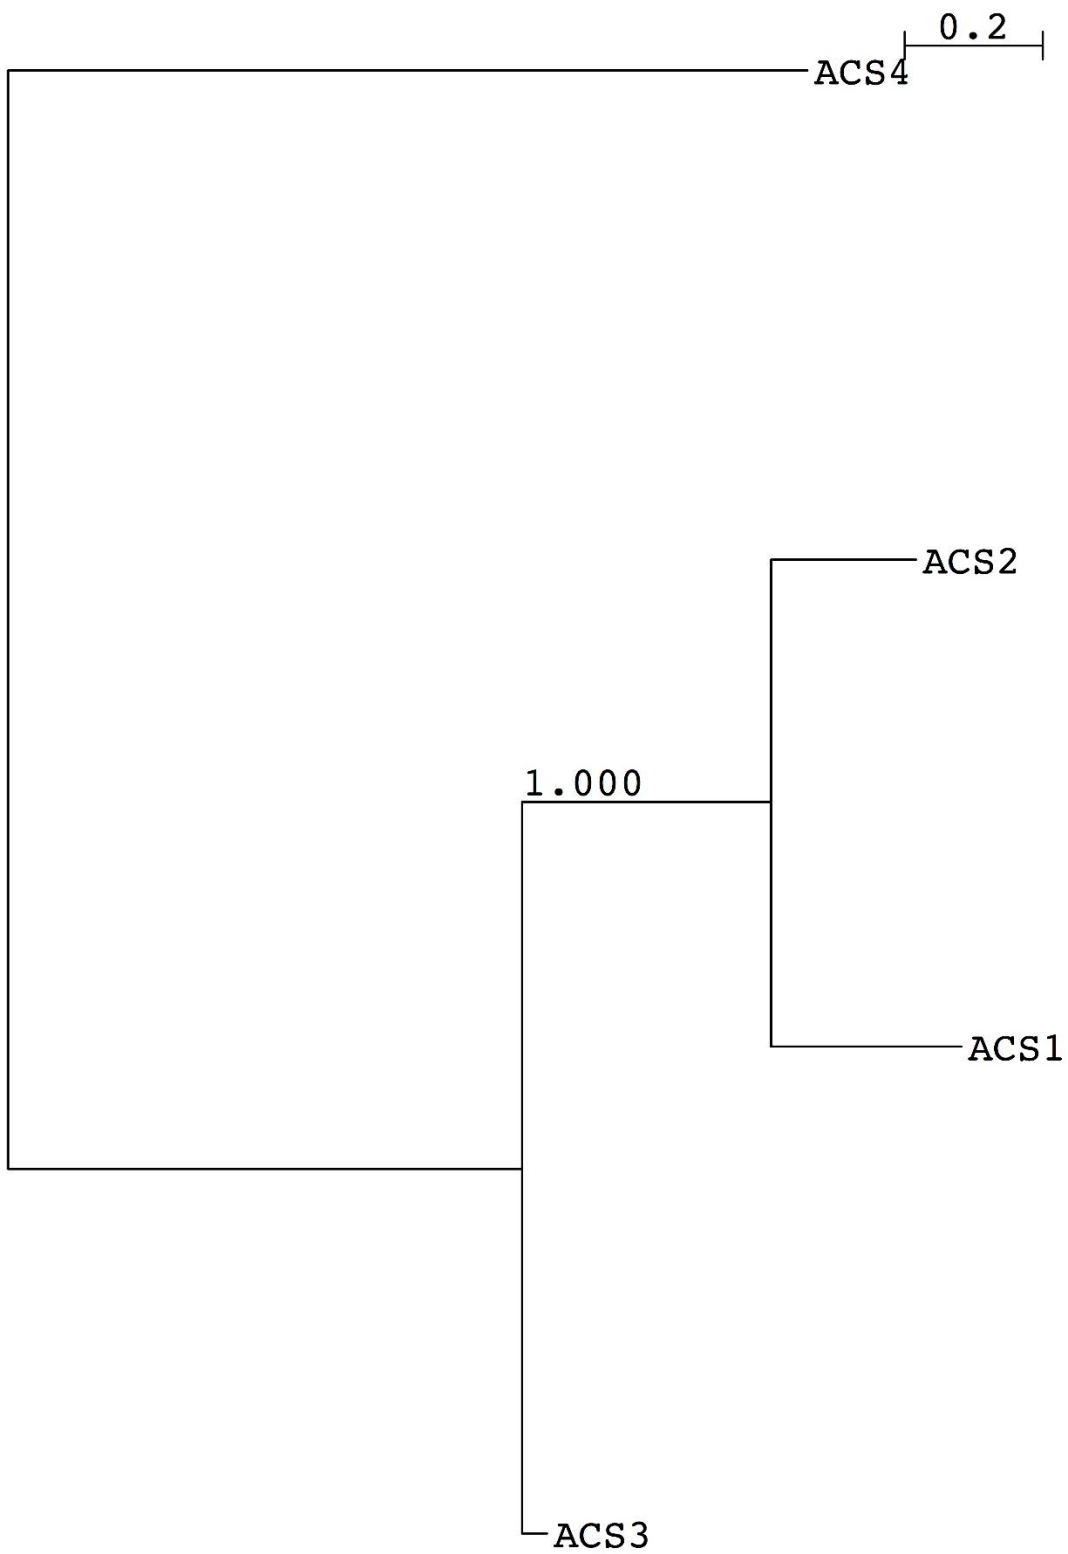

**D**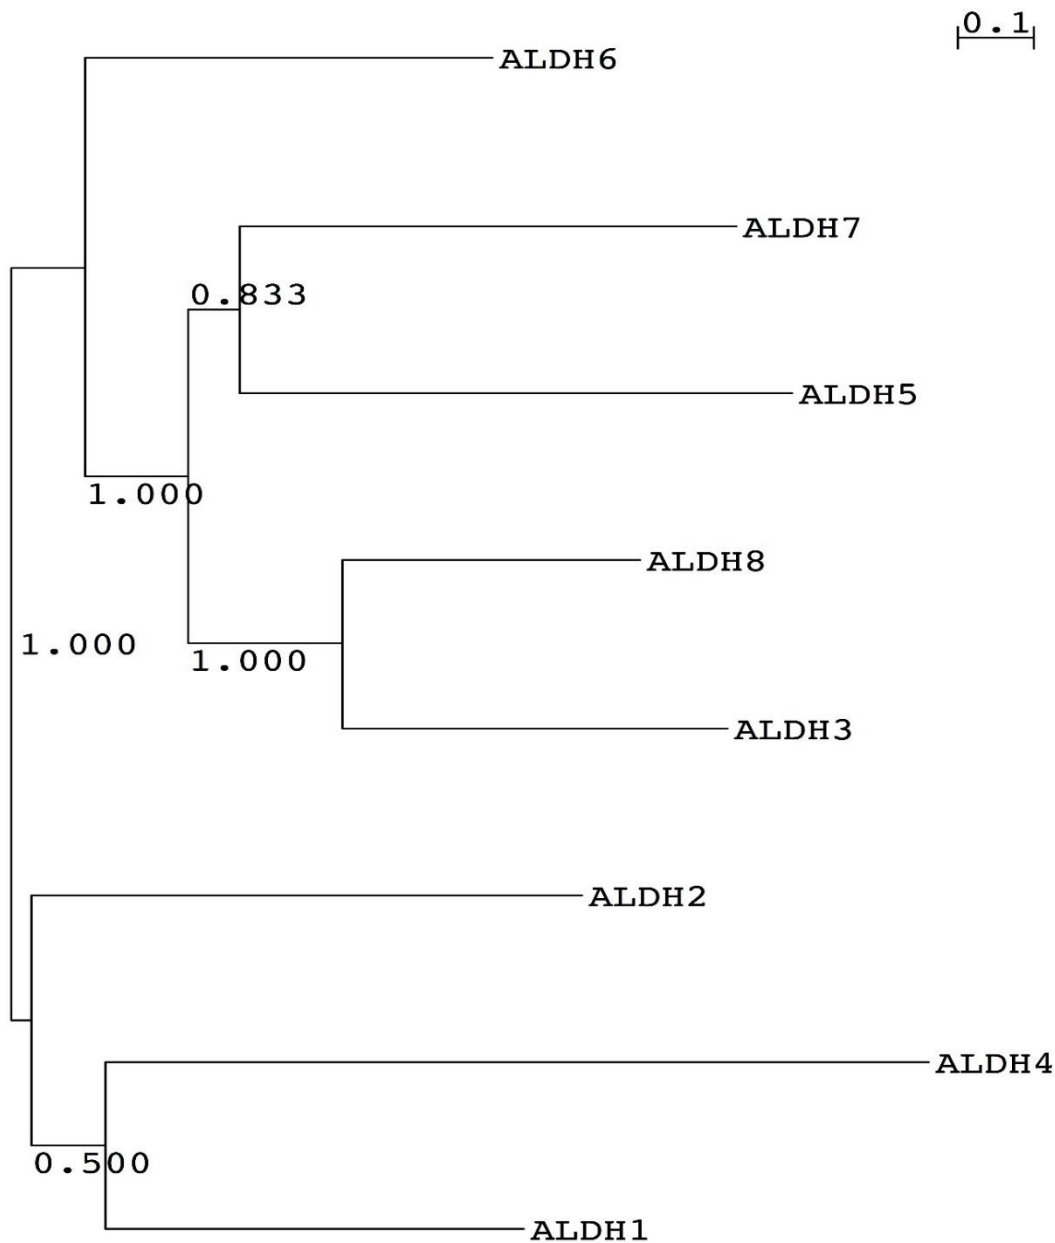

### Supplemental Figure 13. Alignments and Phylogenetic Analyses of Chlamydomonas ACS and ALDH Proteins.

Alignments of 4 ACS (A) and 8 ALDH (B) protein homologs along with phylogenetic analysis (C and D for ACS and ALDH, respectively). Protein IDs are given on the right. Alignments was performed using the online software <http://multalin.toulouse.inra.fr/multalin/> (Corpet, 1988). Identical or highly conserved amino acids in all positions are given in red letters (high consensus region), a low consensus amino acid position is given in blue letters, while black letters indicate an overall lack of strong consensus. The settings for the alignment were: Symbol comparison table: blosum62; Gap weight: 12; Gap length weight: 2; Consensus levels: high=90% low=50%. MrBAYES (via the Cipres Portal) was used to generate the trees (<https://www.phylo.org/portal2/>) (Miller et al., 2010). Newicktops (via the Mobyly Portal) was used to draw the trees <http://mobyly.pasteur.fr/>) (Bertrand et al., 2009). The numbers associated with the phylogenies (C and D) are boot strap values.

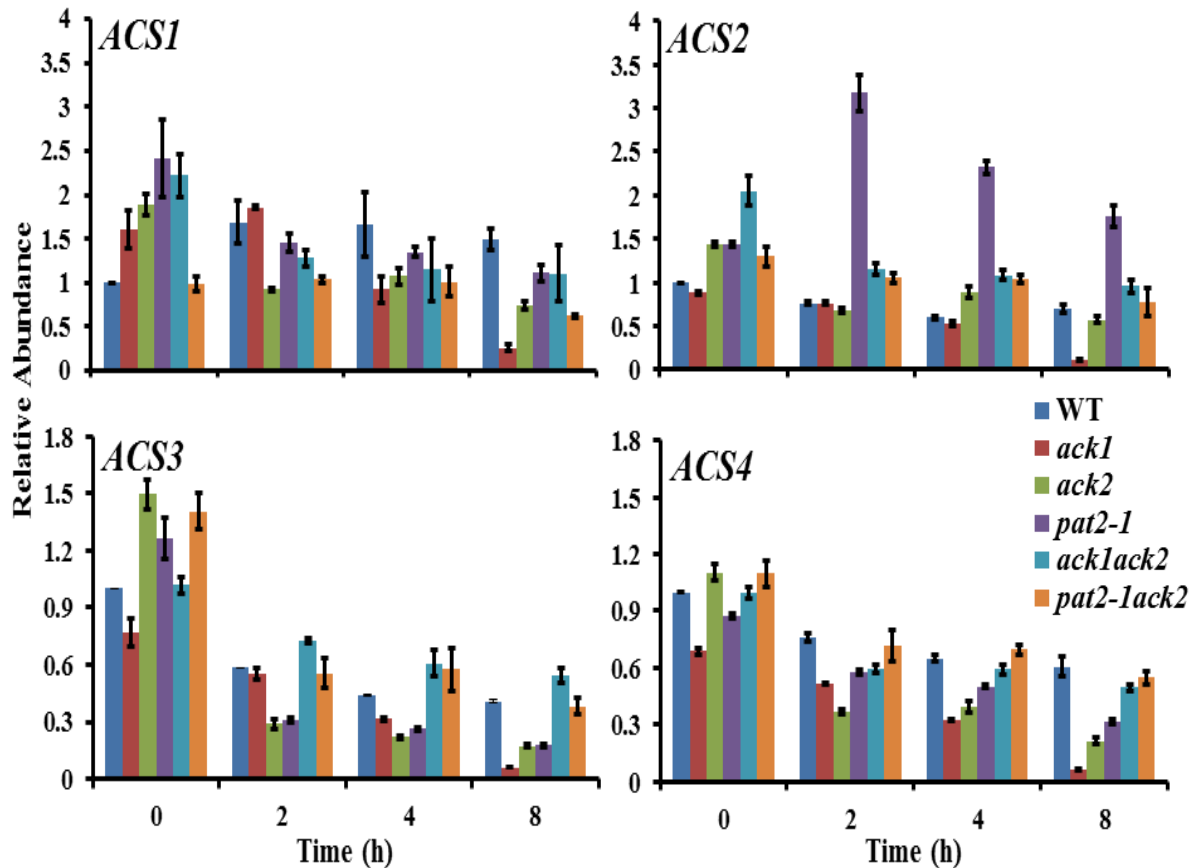

**Supplemental Figure 14. Changes in Levels of Putative Acetyl-CoA Synthetase Transcripts.**

RT-qPCR was used to assess transcript levels of 4 ACS genes in the indicated mutants. Error bars represent SD.

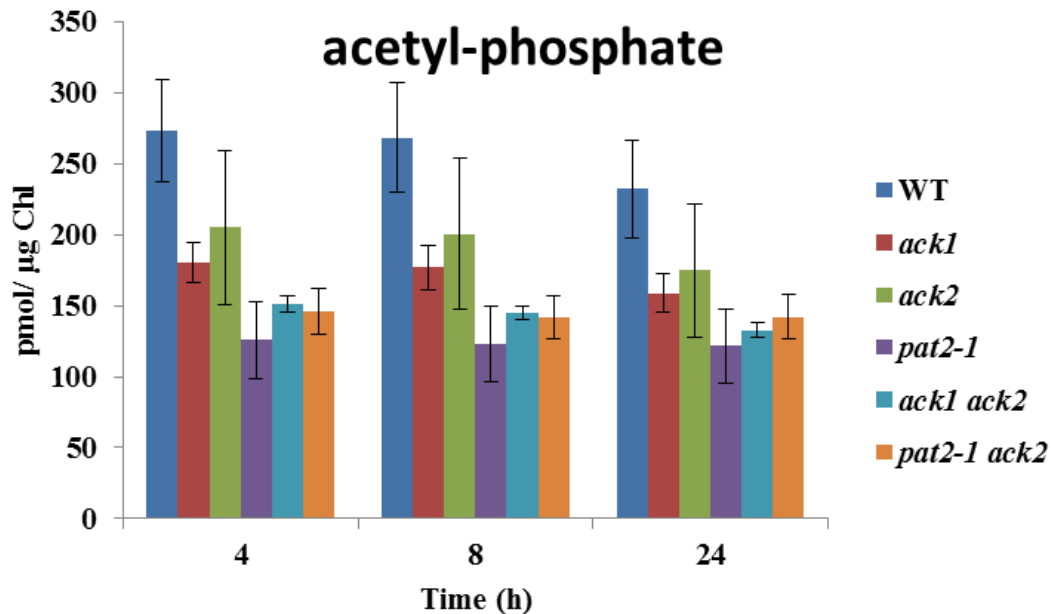

**Supplemental Figure 15. Accumulation of Intracellular Acetyl-Phosphate.**

Acetyl-phosphate was measured in the indicated mutants after 4, 8 or 24 h of dark anoxic acclimation. Errors bars represent SD.



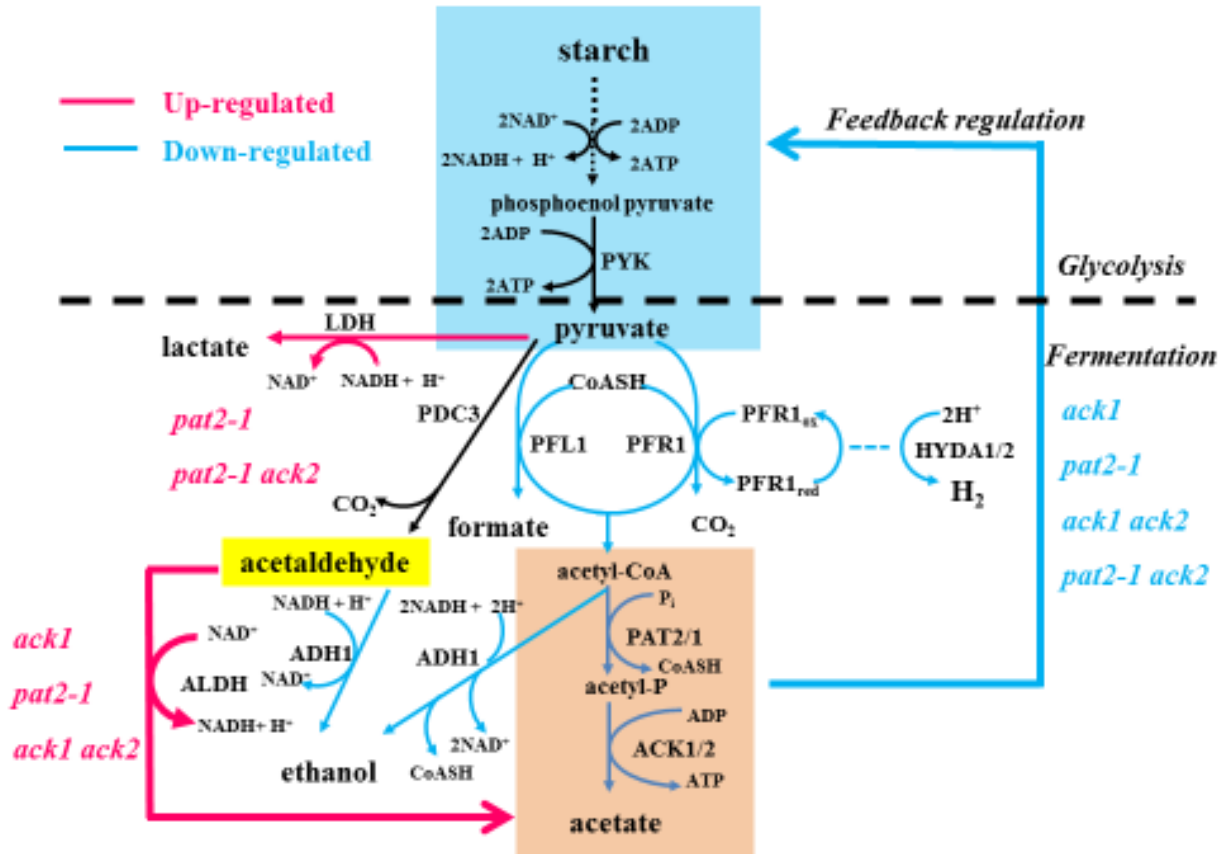

**Supplemental Figure 16. Proposed Anoxic Metabolisms in Single and Double Mutants.**

The light blue background highlights the glycolytic breakdown of starch, and the orange-brown background represents the acetate-producing pathways by the chloroplast and mitochondrial PAT-ACK enzymes. The blue arrows represent reactions and pathways that appear to be suppressed in a subpopulation of mutants (as indicated), while the red arrows represent pathways that appear to be more active in a subpopulation of mutants (as indicated). The black dashed line separates glycolysis from the fermentative pathways of metabolism. The blue dashed line represents omitted electron transfer components involved in hydrogenase reduction (e.g. ferredoxin). The black dashed arrow represents the omitted pathways from starch to phosphoenol pyruvate. Acetaldehyde is highlighted (yellow) to emphasize that the ALDH pathway may be active in some of the mutant strains.

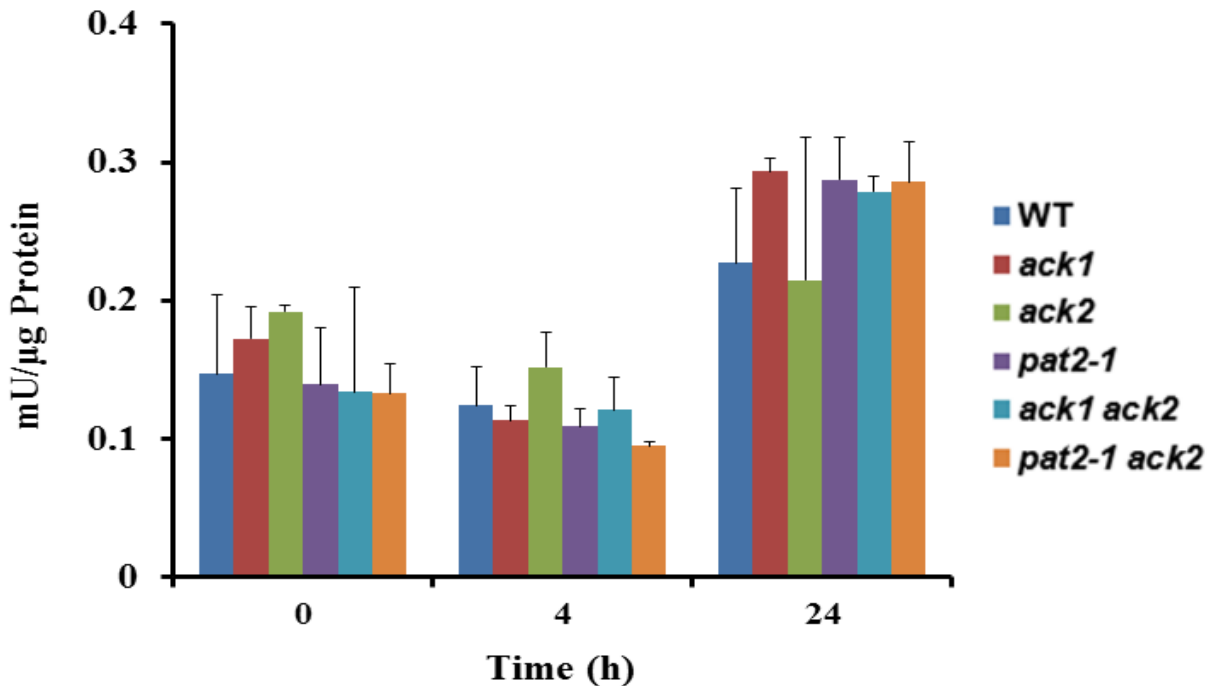

**Supplemental Figure 17. *In Vitro* Aldehyde Dehydrogenase Activity.**

Aldehyde dehydrogenase activity in WT and the indicated mutants after acclimation to dark, anoxic conditions. Errors bars represent SD. One unit (U) is the amount of enzyme that will generate 1.0 mol of NADH per min at pH 8 at room temperature.

**A**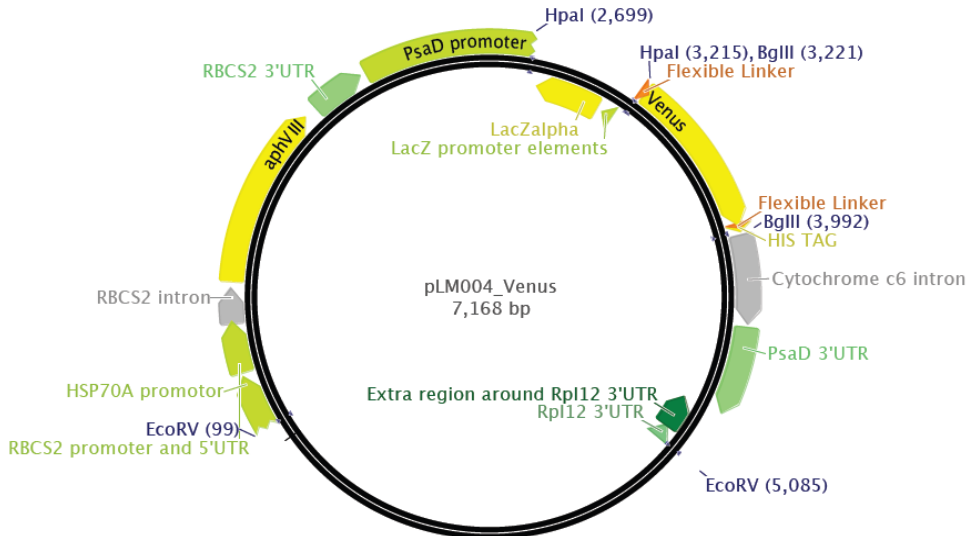**B**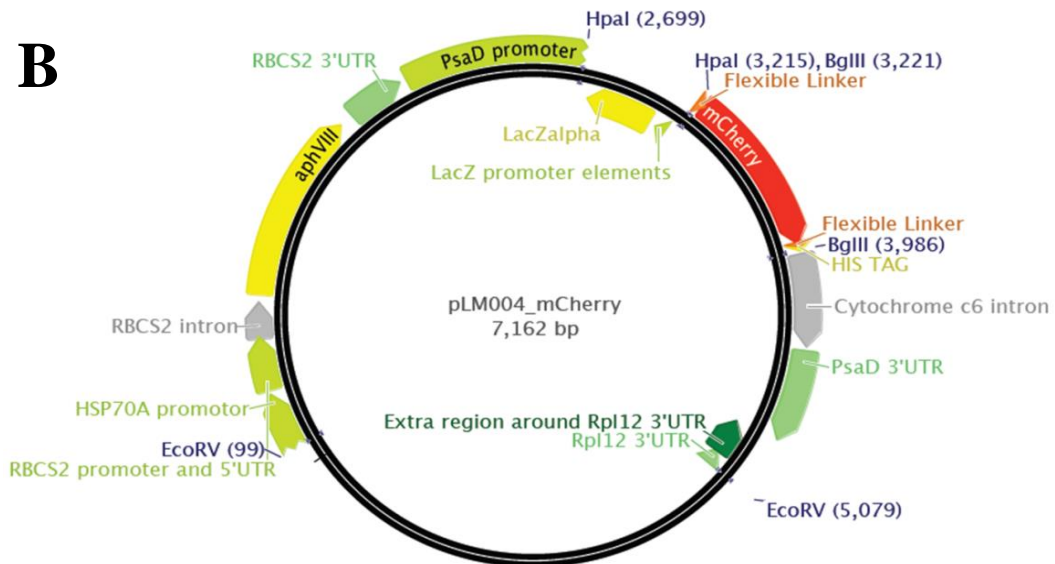**Supplemental Figure 18. Maps of Plasmids used for Protein Subcellular Localization.**

Schematic representations of the pLM004\_Venus (A) and pLM004\_mCherry (B) plasmids, which were used to generate fluorescent fusion proteins for subcellular localization of the ACK and PAT enzymes. Additional information provided in the Methods.

**Supplemental Table 1. Intracellular Pyruvate Levels.**

Intracellular concentrations of pyruvate during a transition from photoautotrophic growth to fermentative metabolism. Values are presented as fg pyruvate cell<sup>-1</sup>. Values shown are the range of biological duplicates. Two replicate samples of each biological duplicate were analyzed. Single values represent the technical average of a single biological replicate.

| <b>Time (h)</b> | <b>WT</b> | <b><i>ack1</i></b> | <b><i>ack2</i></b> | <b><i>ack1ack2</i></b> | <b><i>pat2-1</i></b> | <b><i>pat2-1ack2</i></b> |
|-----------------|-----------|--------------------|--------------------|------------------------|----------------------|--------------------------|
| <b>4</b>        | 1.3 – 1.4 | 0.9 – 2.5          | 1.7 – 1.8          | 2.0 – 3.8              | 2.1 – 4.2            | 2.8                      |
| <b>8</b>        | 1.1 – 1.3 | 0.2 – 0.5          | 0.6 – 1.8          | 2.3 – 5.1              | 1.9                  | 0.7 – 0.9                |
| <b>24</b>       | 0.3 – 0.6 | 0.6 – 0.6          | 0.6 – 0.6          | 0.4 – 0.9              | 0.9 – 1.1            | 0.4 – 0.7                |

**Supplemental Table 2. Primers Used in this Study.**

**(A).** Primers used for the genetic screen to identify the mutants, to amplify the genes for complementation, and for genotyping progenies of the genetic crosses.

**(B).** Primers for generating the constructs used for subcellular localization.

**(C).** Primers used for qRT-PCR.

| Gene                                                                                                                                                                 | Use of Primers | Orientation | Sequence                      | T <sub>m</sub> |
|----------------------------------------------------------------------------------------------------------------------------------------------------------------------|----------------|-------------|-------------------------------|----------------|
| <b>A. Primers used for the genetic screen to identify the mutants, to amplify the genes for complementation, and for genotyping progenies of the genetic crosses</b> |                |             |                               |                |
| ACK1-F1                                                                                                                                                              | Mutant Screen  | forward     | 5'- ATACCTAGAATGCTGGCTGGC -3' | 60.6 °C        |
| ACK1-R1                                                                                                                                                              | Mutant Screen  | reverse     | 5'- GCATGTCACAGCGAGGAGT -3'   | 60.0 °C        |
| ACK1-F2                                                                                                                                                              | Mutant Screen  | forward     | 5'- ACTCCTCGCTGTGACATGC -3'   | 60.0 °C        |
| ACK1-R2                                                                                                                                                              | Mutant Screen  | reverse     | 5'- AAGCAGGAGGAAGGAGAAGG -3'  | 60.0 °C        |
| ACK1-F3                                                                                                                                                              | Mutant Screen  | forward     | 5'- CCTTCTCCTTCTCCTGCTT -3'   | 60.0 °C        |
| ACK1-R3                                                                                                                                                              | Mutant Screen  | reverse     | 5'- CACCACCCACCTGACTTCTT -3'  | 60.0 °C        |
| ACK1-F4                                                                                                                                                              | Mutant Screen  | forward     | 5'- AAGAAGTCAGGTGGGTGGTG -3'  | 60.0 °C        |
| ACK1-R4                                                                                                                                                              | Mutant Screen  | reverse     | 5'- GCAGCTGCCGTAGATCTGTA -3'  | 59.2 °C        |
| ACK1-F5                                                                                                                                                              | Mutant Screen  | forward     | 5'- TACAGATCTACGGCAGCTGC -3'  | 59.2 °C        |
| ACK1-R5                                                                                                                                                              | Mutant Screen  | reverse     | 5'- TGTAGGTCCCTTCTCCATCG -3'  | 60.0 °C        |
| ACK2-F1                                                                                                                                                              | Mutant Screen  | forward     | 5'- GTATCGCGAGAAACGATGC -3'   | 59.4 °C        |
| ACK2-R1                                                                                                                                                              | Mutant Screen  | reverse     | 5'- CAACAGGTGGAGGTGTGATG -3'  | 60.0 °C        |
| ACK2-F2                                                                                                                                                              | Mutant Screen  | forward     | 5'- CATCACACCTCCACCTGTTG -3'  | 60.0 °C        |
| ACK2-R2                                                                                                                                                              | Mutant Screen  | reverse     | 5'- CAAGCAGATGAGGACAAGCA -3'  | 60.1 °C        |
| ACK2-F3                                                                                                                                                              | Mutant Screen  | forward     | 5'- TGCTTGTCTCATCTGCTTG -3'   | 60.1 °C        |
| ACK2-R3                                                                                                                                                              | Mutant Screen  | reverse     | 5'- TACAATGCCTTGCACGAGAG -3'  | 60.0 °C        |
| ACK2-F4                                                                                                                                                              | Mutant Screen  | forward     | 5'- CTCTCGTGCAAGGCATTGTA -3'  | 60.0 °C        |
| ACK2-R4                                                                                                                                                              | Mutant Screen  | reverse     | 5'- CTGATGACCGGGCAGAGTAT -3'  | 60.0 °C        |
| ACK2-F5                                                                                                                                                              | Mutant Screen  | forward     | 5'- ATACTCTGCCGGTCATCAG -3'   | 60.0 °C        |
| ACK2-R5                                                                                                                                                              | Mutant Screen  | reverse     | 5'- GAGGGAACCCATCACAACCTG -3' | 60.4 °C        |
| ACK2-F6                                                                                                                                                              | Mutant Screen  | forward     | 5'- CAGTTGTGATGGGTTCCTC -3'   | 60.4 °C        |
| ACK2-R6                                                                                                                                                              | Mutant Screen  | reverse     | 5'- CACCTGCAGGTCTGCTC -3'     | 60.6 °C        |
| PAT2-F1                                                                                                                                                              | Mutant Screen  | forward     | 5'- ATCGAATACTTTCGGCTCGA -3'  | 59.8 °C        |
| PAT2-R1                                                                                                                                                              | Mutant Screen  | reverse     | 5'- ACCGTATGGAACGCAGGA -3'    | 60.1 °C        |
| PAT2-F2                                                                                                                                                              | Mutant Screen  | forward     | 5'- TCCTGCGTTCCATACGGT -3'    | 60.1 °C        |
| PAT2-R2                                                                                                                                                              | Mutant Screen  | reverse     | 5'- TCACCGCACGGTTGTAGTAG -3'  | 59.8 °C        |
| PAT2-F3                                                                                                                                                              | Mutant Screen  | forward     | 5'- CTACTACAACCGTGCGGTGA -3'  | 59.8 °C        |
| PAT2-R3                                                                                                                                                              | Mutant Screen  | reverse     | 5'- TCTCTACGGGGGCTAAAAGC -3'  | 60.7 °C        |
| PAT2-F4                                                                                                                                                              | Mutant Screen  | forward     | 5'- GCTTTTAGCCCCGTAGAGA -3'   | 60.7 °C        |
| PAT2-R4                                                                                                                                                              | Mutant Screen  | reverse     | 5'- TTTCCCCTCTACAGCTTCCA -3'  | 59.8 °C        |
| PAT2-F5                                                                                                                                                              | Mutant Screen  | forward     | 5'- TGGAAGCTGTAGAGGGGAAA -3'  | 59.8 °C        |
| PAT2-R5                                                                                                                                                              | Mutant Screen  | reverse     | 5'- GTGCTCCGCTTCGTCTACTC -3'  | 60.2 °C        |
| PAT2-F6                                                                                                                                                              | Mutant Screen  | forward     | 5'- GAGTAGACGAAGCGGAGCAC -3'  | 60.2 °C        |

|             |                 |         |                                           |         |
|-------------|-----------------|---------|-------------------------------------------|---------|
| PAT2-R6     | Mutant Screen   | reverse | 5'- CTATGCCACCACAGCATGTC -3'              | 60.1 °C |
| PAT2-F7     | Mutant Screen   | forward | 5'- GACATGCTGTGGTGGCATAG -3'              | 60.1 °C |
| PAT2-R7     | Mutant Screen   | reverse | 5'- CGTCACACACACAGGTGACA -3'              | 60.3 °C |
| PAT2-F8     | Mutant Screen   | forward | 5'- TGTCACCTGTGTGTGTGACG -3'              | 60.3 °C |
| PAT2-R8     | Mutant Screen   | reverse | 5'- GAGAGCGTGTGTGCATTTGT -3'              | 60.0 °C |
| PAT2-F9     | Mutant Screen   | forward | 5'- ACAAATGCACACACGCTCTC -3'              | 60.0 °C |
| PAT2-R9     | Mutant Screen   | reverse | 5'- AGCCCAAACAAGGGGTGT -3'                | 60.4 °C |
| PAT2-F10    | Mutant Screen   | forward | 5'- ACACCCCTTGTTTGGGCT -3'                | 60.4 °C |
| PAT2-R10    | Mutant Screen   | reverse | 5'- CCACAACCACGCAAGACA -3'                | 60.3 °C |
| PAT2-F11    | Mutant Screen   | forward | 5'- TGTCTTGCGTGGTTGTGG -3'                | 60.3 °C |
| PAT2-R11    | Mutant Screen   | reverse | 5'- GACAGTGACATTGCCGTTTG -3'              | 60.2 °C |
| PAT2-F12    | Mutant Screen   | forward | 5'- CAAACGGCAATGTCACGTGTC -3'             | 60.2 °C |
| PAT2-R12    | Mutant Screen   | reverse | 5'- CGCCCTACACAACCAAGAG -3'               | 59.3 °C |
| RB1         | Mutant Screen   | forward | 5'- ATGGGGCGGTATCGGAGGAAAAG-3'            | 60.0 °C |
| RB2         | Mutant Screen   | forward | 5'- TACCGGCTGTTGGACGAGTTCTTCTG -3'        | 60.0 °C |
| RIM1        | Mutant Screen   | reverse | 5'- GCTGGCAGGAGTACGGGTTG -3'              | 58.0 °C |
| MID-UP      | Mating type     | forward | 5'- ATGGCCTGTTTCTTAGC -3'                 | 61.6 °C |
| MID-LOW     | Mating type     | reverse | 5'- CTACATGTGTTTCTTGACG-3'                | 52.0 °C |
| FUS-UP      | Mating type     | forward | 5'- ATGCCTATCTTTCTCATTCT-3'               | 52.0 °C |
| FUS-LOW     | Mating type     | reverse | 5'- GCAAATAACACGTCTGGAAG-3'               | 52.0 °C |
| Paro-up     | Southern Blot   | forward | 5'- ATGGGGCGGTATCGGAGGAAAAG -3'           | 60.0 °C |
| Paro-dw     | Southern Blot   | reverse | 5'- TACCGGCTGTTGGACGAGTTCTTCTG -3'        | 60.0 °C |
| ACK1-COM-F1 | Complementation | forward | 5'- GAATTCCAAAGACGCAAACATATACG-3'         | 56.2 °C |
| ACK1-COM-R1 | Complementation | reverse | 5'- TAGGATCCAATTATCCGAGCTACACACT-3'       | 56.8 °C |
| ACK1-COM-F2 | Complementation | forward | 5'- GCACTAGCCACAAGTACCTGG-3'              | 60.0 °C |
| ACK2-COM-F1 | Complementation | forward | 5'- GAATTCCCGTAGGGGGTATTGATATACAA<br>G-3' | 59.9 °C |
| ACK2-COM-R1 | Complementation | reverse | 5'- TAGGATCCCCCTGTCACATTGACTCACG-3'       | 60.2 °C |
| PAT2-COM-F1 | Complementation | forward | 5'- GAATTCATGTCTCTGAACAGTAGCACTAT<br>G-3' | 58.5 °C |
| PAT2-COM-R1 | Complementation | reverse | 5'- GGATCCGGTGGGCATTGACAGACAA-3'          | 59.1 °C |
| PAT2-COM-F2 | Complementation | forward | 5'- CGACTACTACAACCGTGCGA-3'               | 59.9 °C |
| PAT2-COM-F3 | Complementation | forward | 5'- ATCACGCTGCTGGGAGAC-3'                 | 59.9 °C |

**B. Primers for generating the constructs used for subcellular localization**

|            |              |         |                                               |         |
|------------|--------------|---------|-----------------------------------------------|---------|
| ACK1-Loc-F | Localization | forward | 5'- GTTAACATGCTGGCTGGCAAAGTGCCTGTC<br>GGT -3' | 60.0 °C |
| ACK1-Loc-R | Localization | reverse | 5'- GGTAAACAGCGGCCAGCGCCGCGCC -3'             | 60.0 °C |
| ACK2-Loc-F | Localization | forward | 5'- GGTAAACATGAAGCCGCGCAAATGGGAGC<br>-3'      | 60.0 °C |
| ACK2-Loc-R | Localization | reverse | 5'- GGTAACTGCCGCTGCGGCTCCCAA -3'              | 60.0 °C |
| PAT1-Loc-F | Localization | forward | 5'- GGTAAACATGGCCTTCGCGAGCAGCAGCAT<br>-3'     | 60.0 °C |
| PAT1-Loc-R | Localization | reverse | 5'- GGTAAACCTTGGGCGCTGCTGCCGC -3'             | 60.0 °C |

|                                    |              |         |                                             |         |
|------------------------------------|--------------|---------|---------------------------------------------|---------|
| PAT2-Loc-F                         | Localization | forward | 5'-GGTAAACATGTCTCTGAACAGTAGCACTAT<br>GT -3' | 60.0 °C |
| PAT2-Loc-R                         | Localization | reverse | 5'-GGTAAACGAACGGCCGCGACGGCAGC -3'           | 60.0 °C |
| <b>C. Primers used for qRT-PCR</b> |              |         |                                             |         |
| PFL1                               | qRT-PCR      | forward | 5'- ATGTACGCGAACACCCATGAA-3'                | 54.6 °C |
| PFL1                               | qRT-PCR      | reverse | 5'- GTCACCTGGGCGTACTTGAT-3'                 | 57.1 °C |
| PFR1                               | qRT-PCR      | forward | 5'- CGCGCAGGGCACAATCACAC-3'                 | 62 °C   |
| PFR1                               | qRT-PCR      | reverse | 5'- ATCAGACGGCGCCACAAACACA-3'               | 61.9 °C |
| ACK1-B                             | qRT-PCR      | forward | 5'- CAACTGCGTGTGAAGGCTA-3'                  | 57.4 °C |
| ACK1-B                             | qRT-PCR      | reverse | 5'- AAGGTGCTCGACACGTTCTC-3'                 | 55.2 °C |
| ACK1-A                             | qRT-PCR      | forward | 5'- GCCGTACGACATGTACGAGA-3'                 | 60.0 °C |
| ACK1-A                             | qRT-PCR      | reverse | 5'- AGGTGATGACGTTGGTCTCC-3'                 | 60.0 °C |
| ACK2-B                             | qRT-PCR      | forward | 5'- GCAGCAGCTCGCTTAAGTTT-3'                 | 56.2 °C |
| ACK2-B                             | qRT-PCR      | reverse | 5'- GCACTTTGAGCTCCCATTTG-3'                 | 54.6 °C |
| PAT1                               | qRT-PCR      | forward | 5'- ATCAACTTCTTCGGCACCAT-3'                 | 55.2 °C |
| PAT1                               | qRT-PCR      | reverse | 5'- ATGGAGGACACGAGGCTAGA -3'                | 54.8 °C |
| PAT2-B                             | qRT-PCR      | forward | 5'- ACCCTCTTCTCTCGGACAT-3'                  | 57.4 °C |
| PAT2-B                             | qRT-PCR      | reverse | 5'- GTCGCCCTTGAGGTTAAACA-3'                 | 55.2 °C |
| PAT2-A                             | qRT-PCR      | forward | 5'- GTTCATGCACACGCTCAAGT -3'                | 60.0 °C |
| PAT2-A                             | qRT-PCR      | reverse | 5'- CTCCCAGCAGCGTGATCT -3'                  | 60.0 °C |
| HYDA1                              | qRT-PCR      | forward | 5'- CGGGAACGTGGGTAGCATTTAGG-3'              | 59.8 °C |
| HYDA1                              | qRT-PCR      | reverse | 5'- CGCCAAGGGTCCACATCAGAGT-3'               | 61.5 °C |
| HYDA2                              | qRT-PCR      | forward | 5'- GCGGGCAAGTTCTTCAATCT-3'                 | 61.6 °C |
| HYDA2                              | qRT-PCR      | reverse | 5'- AGGCCGAATGACTCAGCAAT-3'                 | 62.0 °C |
| PDC3                               | qRT-PCR      | forward | 5'- TACTCCACTGCCGGCTACTC-3'                 | 58.6 °C |
| PDC3                               | qRT-PCR      | reverse | 5'- AGAGCCATGCGCTTGTAGAT-3'                 | 61.6 °C |
| LDH                                | qRT-PCR      | forward | 5'- AGTTAGCCAAGGCGGGTGTG-3'                 | 55.5 °C |
| LDH                                | qRT-PCR      | reverse | 5'- TGTTGAGCGCGAAGATGAGC-3'                 | 61.6 °C |
| ADH1                               | qRT-PCR      | forward | 5'- GCACCTGCTGAACATCAAGA-3'                 | 55.6 °C |
| ADH1                               | qRT-PCR      | reverse | 5'- AGGATGTGGGTGACCTTGTC-3'                 | 56.9 °C |
| ACS1                               | qRT-PCR      | forward | 5'- TCCAACATCAACGTGGAGAA -3'                | 60.1 °C |
| ACS1                               | qRT-PCR      | reverse | 5'- GTCATTGCCCTCCCAAATA-3'                  | 59.8 °C |
| ACS2                               | qRT-PCR      | forward | 5'- GTGCTGGTGTACGAGAACGA -3'                | 59.9 °C |
| ACS2                               | qRT-PCR      | reverse | 5'- CGAGGTGTACAGCAGGAACA -3'                | 59.9 °C |
| ACS3                               | qRT-PCR      | forward | 5'- ACTCATCTGGGAGGGCAAC -3'                 | 60.1 °C |
| ACS3                               | qRT-PCR      | reverse | 5'- AGGTAGATGGTCACGGCATC -3'                | 60.0 °C |
| ACS4                               | qRT-PCR      | forward | 5'- GACGAGAAGGGCAACGAGT-3'                  | 60.4 °C |
| ACS4                               | qRT-PCR      | reverse | 5'- GAAGTAGTAGCCGGGGAAGG-3'                 | 60.1 °C |
| ALDH1                              | qRT-PCR      | forward | 5'- CGCAGACCTGATCGACTACA -3'                | 60.0 °C |
| ALDH1                              | qRT-PCR      | reverse | 5'- GTTGACCGGGTAGTTGAAGG -3'                | 59.5 °C |
| ALDH2                              | qRT-PCR      | forward | 5'- GGTTCATCGTTTCTTCGCTTC -3'               | 59.8 °C |

|       |         |         |                               |         |
|-------|---------|---------|-------------------------------|---------|
| ALDH2 | qRT-PCR | reverse | 5'- AACTCGGATTTGGTGGTCAG -3'  | 60.0 °C |
| ALDH3 | qRT-PCR | forward | 5'- CAGCTGGAGACACTGGACAA -3'  | 60.0 °C |
| ALDH3 | qRT-PCR | reverse | 5'- AAGGTGTAGGCCAGGTAGGG -3'  | 60.0 °C |
| ALDH4 | qRT-PCR | forward | 5'- CTACCGTCCTTGTTGCACCT -3'  | 60.1 °C |
| ALDH4 | qRT-PCR | reverse | 5'- TCTCATCCACCTGTGTGTGC -3'  | 60.8 °C |
| ALDH5 | qRT-PCR | forward | 5'- ATCTGGGAGGAGGAGGTGTT -3'  | 59.6 °C |
| ALDH5 | qRT-PCR | reverse | 5'- ATGTAGGTGGTGGCGAAGTC -3'  | 60.0 °C |
| ALDH6 | qRT-PCR | forward | 5'- GACAAAGGCACCTTCGATGT -3'  | 60.1 °C |
| ALDH6 | qRT-PCR | reverse | 5'- TGATGCTGCAGAATGAGGTC -3'  | 60.0 °C |
| ALDH7 | qRT-PCR | forward | 5'- CGAAGGTGCTGAAAGCCTAC -3'  | 60.0 °C |
| ALDH7 | qRT-PCR | reverse | 5'- GCCCTAGGCCAGTCGTA ACT -3' | 60.7 °C |
| ALDH8 | qRT-PCR | forward | 5'- CCTACCGCGCTAAGTACCTG -3'  | 60.0 °C |
| ALDH8 | qRT-PCR | reverse | 5'- GACCCGCGTAGTAGTCAAG -3'   | 60.0 °C |



**Supplemental Table 3. Constructs Used in this Study**

| Use             | Construct    | Plasmid name       | Insert or PCR product | Primers                     | Plasmid backbone | Cloning method |
|-----------------|--------------|--------------------|-----------------------|-----------------------------|------------------|----------------|
| Localization    | Venus        | pLM004_Venus       | -                     | -                           | pUC19            | -              |
|                 | Venus:ACK1   | pLM004ACK1_Venus   | ACK1CDS               | ACK1-Loc-F/<br>ACK1-Loc-R1  | pUC19            | HpaI/HpaI      |
|                 | Venus:ACK2   | pLM004ACK2_Venus   | ACK2CDS               | ACK2-Loc-F/<br>ACK2-Loc-R1  | pUC19            | HpaI/HpaI      |
|                 | Venus:PAT1   | pLM004PAT1_Venus   | PAT1CDS               | PAT1-Loc-F/<br>PAT1-Loc-R1  | pUC19            | HpaI/HpaI      |
|                 | Venus:PAT2   | pLM004PAT2_Venus   | PAT2CDS               | PAT2-Loc-F/<br>PAT2-Loc-R1  | pUC19            | HpaI/HpaI      |
|                 | mCherry      | pLM004_mCherry     | -                     | -                           | pUC19            | -              |
|                 | mCherry:ACK2 | pLM004ACK2_mCherry | ACK2CDS               | ACK2-Loc-F/<br>ACK2-Loc-R1  | pUC19            | HpaI/HpaI      |
|                 | mCherry:PAT1 | pLM004PAT1_mCherry | PAT1CDS               | PAT1-Loc-F/<br>PAT1-Loc-R1  | pUC19            | HpaI/HpaI      |
| Complementation | PSAD:ACK1    | pJM43Ble_ACK1      | ACK1 cDNA             | ACK1-COM-F1/<br>ACK1-COM-R1 | pSP124           | EcoRI/BamHI    |
|                 | PSAD:ACK2    | pJM43Ble_ACK2      | ACK2 cDNA             | ACK2-COM-F1/<br>ACK2-COM-R1 | pSP124           | EcoRI/BamHI    |
|                 | PSAD:PAT2    | pJM43Ble_ACK2      | PAT1 cDNA             | PAT2-COM-F1/<br>PAT2-COM-R1 | pSP124           | EcoRI/BamHI    |
